# Supplementary material
Source: PubMed Central journal article supplement (PMC9002717)
Supplement: jamapediatr-e220483-s001.pdf [file jamapediatr-e220483-s001.pdf]

## Supplementary Online Content

Ninan K, Liyanage SK, Murphy KE, Asztalos EV, McDonald SD. Evaluation of long-term outcomes associated with preterm exposure to antenatal corticosteroids: a systematic review and meta-analysis. *JAMA Pediatr*. Published online April 11, 2022. doi:10.1001/jamapediatrics.2022.0483

**eTable 1.** Inclusion and Exclusion Criteria for a Systematic Review and Meta-analysis of Long-Term Outcomes Associated with Preterm Exposure to Antenatal Corticosteroids

**eTable 2.** Individual Adjusted Neurodevelopmental/Psychological Outcomes of Included Studies on a Single Course of Antenatal Corticosteroids vs. Non-Exposure in a Systematic Review and Meta-analysis of Long-Term Outcomes Associated with Preterm Exposure to Antenatal Corticosteroids

**eTable 3.** Individual Unadjusted Neurodevelopmental/Psychological Outcomes of Included Studies on a Single Course of Antenatal Corticosteroids vs. Non-Exposure in a Systematic Review and Meta-analysis of Long-Term Outcomes Associated with Preterm Exposure to Antenatal Corticosteroids

**eTable 4.** Individual Adjusted Neurodevelopmental/Psychological Outcomes of Included Studies on an Unspecified Number of Courses of Antenatal Corticosteroids vs. Non-Exposure in a Systematic Review and Meta-analysis of Long-Term Outcomes Associated with Preterm Exposure to Antenatal Corticosteroids

**eTable 5.** Individual Unadjusted Neurodevelopmental/Psychological Outcomes of Included Studies on an Unspecified Number of Courses of Antenatal Corticosteroids vs. Non-Exposure in a Systematic Review and Meta-analysis of Long-Term Outcomes Associated with Preterm Exposure to Antenatal Corticosteroids

**eTable 6.** Summary of Findings Table of Secondary Meta-analyzed Outcomes in a Systematic Review and Meta-analysis of Long-Term Outcomes Associated with Preterm Exposure to Antenatal Corticosteroids

**eTable 7.** Other Long-Term Outcomes of Included Studies in a Systematic Review and Meta-analysis of Long-Term Outcomes Associated with Preterm Exposure to Antenatal Corticosteroids

**eTable 8.** Newcastle-Ottawa Scale Quality Assessment Scores for Non-Randomized Studies Included in a Systematic Review and Meta-analysis of Long-Term Outcomes Associated with Preterm Exposure to Antenatal Corticosteroids

**eFigure 1.** Visual Representation of Available Individual Adjusted Neurodevelopmental/Psychological Outcomes in a Systematic Review and Meta-analysis of Long-Term Outcomes Associated with Preterm Exposure to Antenatal Corticosteroids

**eFigure 2.** Forest Plots of Sensitivity Analyses and Meta-analyzed Unadjusted Neurodevelopmental/Psychological and Other Outcomes in a Systematic Review and Meta-analysis of Long-Term Outcomes Associated with Preterm Exposure to Antenatal Corticosteroids

**eFigure 3.** Visual Representation of Available Individual Unadjusted Neurodevelopmental/Psychological Outcomes in a Systematic Review and Meta-analysis of Long-Term Outcomes Associated with Preterm Exposure to Antenatal Corticosteroids

**eFigure 4.** Infographic Abstract of a Systematic Review and Meta-analysis of Long-Term Outcomes Associated with Preterm Exposure to Antenatal Corticosteroids

**eAppendix 1.** Electronic Search Strategies for a Systematic Review and Meta-analysis of Long-Term Outcomes Associated with Preterm Exposure to Antenatal Corticosteroids

**eAppendix 2.** Excluded Key Articles from a Systematic Review and Meta-analysis of Long-Term Outcomes Associated with Preterm Exposure to Antenatal Corticosteroids

**eAppendix 3.** Confounding Factors Addressed in a Systematic Review and Meta-analysis of Long-Term Outcomes Associated with Preterm Exposure to Antenatal Corticosteroids

## **eReferences**

This supplementary material has been provided by the authors to give readers additional information about their work.

**eTable 1.** Inclusion and Exclusion Criteria for a Systematic Review and Meta-analysis of Long-Term Outcomes Associated with Preterm Exposure to Antenatal Corticosteroids

| Study (country)<br>[Risk of bias assessment]         | Inclusion criteria                                                                                                                                                                                                                                                                                                                                                                                                                                                                                                                                                                                       | Exclusion criteria                                                                                                                                                                                                                                                                                                  |
|------------------------------------------------------|----------------------------------------------------------------------------------------------------------------------------------------------------------------------------------------------------------------------------------------------------------------------------------------------------------------------------------------------------------------------------------------------------------------------------------------------------------------------------------------------------------------------------------------------------------------------------------------------------------|---------------------------------------------------------------------------------------------------------------------------------------------------------------------------------------------------------------------------------------------------------------------------------------------------------------------|
| <b>A single course of ACS versus those unexposed</b> |                                                                                                                                                                                                                                                                                                                                                                                                                                                                                                                                                                                                          |                                                                                                                                                                                                                                                                                                                     |
| <i>Children born preterm</i>                         |                                                                                                                                                                                                                                                                                                                                                                                                                                                                                                                                                                                                          |                                                                                                                                                                                                                                                                                                                     |
| Chawla, 2013 (U.S.) <sup>1</sup><br>★★★★★★           | <ul style="list-style-type: none"> <li>• GA &lt;28 weeks</li> <li>• BW 400-1000g</li> <li>• Included data on race/ethnicity of children at baseline [ACS group, n=80; unexposed group, n=28]               <ul style="list-style-type: none"> <li>○ African American in ACS group (n=63)</li> <li>○ African American in unexposed group (n=26)</li> </ul> </li> </ul>                                                                                                                                                                                                                                    | <ul style="list-style-type: none"> <li>• Stillbirths</li> <li>• Congenital infections</li> <li>• Chromosomal or major congenital anomalies</li> <li>• Neonates not resuscitated at birth due to extreme prematurity</li> </ul>                                                                                      |
| Gover, 2012 (Canada) <sup>2</sup><br>★★★★★★½         | <ul style="list-style-type: none"> <li>• GA ≤32 weeks</li> </ul>                                                                                                                                                                                                                                                                                                                                                                                                                                                                                                                                         | <ul style="list-style-type: none"> <li>• Major congenital anomalies</li> <li>• Maternal heroin or cocaine use during pregnancy</li> <li>• Major infant impairment</li> <li>• Infants exposed to a partial course or more than a single course of ACS</li> <li>• Infants on hydrocortisone post-discharge</li> </ul> |
| Chawla, 2016 (U.S.) <sup>3</sup><br>★★★★★★           | <ul style="list-style-type: none"> <li>• BW 401-1000 g/a GA of 22-27 weeks as determined by early ultrasonography or last menstrual period</li> <li>• Included data on race/ethnicity of mothers at baseline [ACS group, n=3630; unexposed group, n=833]               <ul style="list-style-type: none"> <li>○ White in ACS group (n=1987)</li> <li>○ African American in ACS group (n=1445)</li> <li>○ Other in ACS group (n=198)</li> <li>○ White in unexposed group (n=394)</li> <li>○ African American in unexposed group (n=399)</li> <li>○ Other in unexposed group (n=40)</li> </ul> </li> </ul> | <ul style="list-style-type: none"> <li>• Infants who died within 12h of birth without aggressive neonatal care</li> </ul>                                                                                                                                                                                           |
| Lee, 2008 (U.S.) <sup>4</sup><br>★★★★★★½             | <ul style="list-style-type: none"> <li>• BW 401-1000g</li> <li>• Born at NICHD Neonatal Research Network centers</li> <li>• Included data on race/ethnicity of children followed-up [betamethasone group, n=563; dexamethasone group, n=408; unexposed group, n=153]</li> </ul>                                                                                                                                                                                                                                                                                                                          | <ul style="list-style-type: none"> <li>• Congenital or chromosomal anomaly</li> <li>• Inborn error of metabolism</li> <li>• Exposure to both dexamethasone and betamethasone</li> <li>• Outborn infants</li> </ul>                                                                                                  |

| Study (country)<br>[Risk of bias<br>assessment]    | Inclusion criteria                                                                                                                                                                                                                                                                                                                                                                                                                  | Exclusion criteria                                                                                                                                                                                                                                  |
|----------------------------------------------------|-------------------------------------------------------------------------------------------------------------------------------------------------------------------------------------------------------------------------------------------------------------------------------------------------------------------------------------------------------------------------------------------------------------------------------------|-----------------------------------------------------------------------------------------------------------------------------------------------------------------------------------------------------------------------------------------------------|
|                                                    | <ul style="list-style-type: none"> <li>○ “Non-white” in betamethasone group (56%)</li> <li>○ “Non-white” in dexamethasone group (70%)</li> <li>○ “Non-white” in unexposed group (79%)</li> </ul>                                                                                                                                                                                                                                    |                                                                                                                                                                                                                                                     |
| Agarwal, 2018<br>(Singapore) <sup>5</sup><br>★★★★★ | <ul style="list-style-type: none"> <li>• PTB/ VLBW (<math>\leq 1250</math> g)</li> <li>• Born at the KK Women’s and Children’s Hospital (KKH)</li> <li>• Survived until follow-up</li> <li>• Included data on race/ethnicity of all children at baseline [n=165]               <ul style="list-style-type: none"> <li>○ Chinese (53%)</li> <li>○ Malay (27%)</li> <li>○ Indian (15%)</li> <li>○ “Other” (5%)</li> </ul> </li> </ul> | <ul style="list-style-type: none"> <li>• Major congenital malformations</li> </ul>                                                                                                                                                                  |
| Kim, 2018 (Korea) <sup>6</sup><br>★★★★½            | <ul style="list-style-type: none"> <li>• 21-23 weeks GA (determined by the LMP or crown-rump length on 1<sup>st</sup> trimester ultrasonography)</li> </ul>                                                                                                                                                                                                                                                                         | <ul style="list-style-type: none"> <li>• Stillbirth</li> <li>• Voluntary termination of pregnancy or parental elective non-resuscitations</li> <li>• Delayed-interval delivery in twin pregnancies</li> <li>• Major congenital anomalies</li> </ul> |
| Laughon, 2009 (U.S.) <sup>7</sup><br>★★★★½         | <ul style="list-style-type: none"> <li>• GA &lt;28 weeks</li> <li>• Children able to walk independently (Gross Motor Function Classification System)</li> </ul>                                                                                                                                                                                                                                                                     | <ul style="list-style-type: none"> <li>• NS</li> </ul>                                                                                                                                                                                              |
| McElrath, 2009 (U.S.) <sup>8</sup><br>★★★★½        | <ul style="list-style-type: none"> <li>• &lt;28 weeks GA</li> </ul>                                                                                                                                                                                                                                                                                                                                                                 | <ul style="list-style-type: none"> <li>• Birth defects and/or aneuploidy</li> </ul>                                                                                                                                                                 |
| Lardon, 2017 (Spain) <sup>9</sup><br>★★★★½         | <ul style="list-style-type: none"> <li>• Preterm infants</li> <li>• BW &lt;1,500 g</li> </ul>                                                                                                                                                                                                                                                                                                                                       | <ul style="list-style-type: none"> <li>• Major malformation detectable in fetus or newborn</li> <li>• Genetic syndromes or metabolic disturbances</li> </ul>                                                                                        |
| Tseng, 2016 (Taiwan) <sup>10</sup><br>★★★★½        | <ul style="list-style-type: none"> <li>• GA &lt;35 weeks</li> <li>• BW &lt;1500g</li> </ul>                                                                                                                                                                                                                                                                                                                                         | <ul style="list-style-type: none"> <li>• NS</li> </ul>                                                                                                                                                                                              |

| Study (country)<br>[Risk of bias<br>assessment]                    | Inclusion criteria                                                                                                                                                                                                                                                                                                                                                                   | Exclusion criteria                                                                                                                                                                                                                               |
|--------------------------------------------------------------------|--------------------------------------------------------------------------------------------------------------------------------------------------------------------------------------------------------------------------------------------------------------------------------------------------------------------------------------------------------------------------------------|--------------------------------------------------------------------------------------------------------------------------------------------------------------------------------------------------------------------------------------------------|
| <b>Unspecified number of courses of ACS versus those unexposed</b> |                                                                                                                                                                                                                                                                                                                                                                                      |                                                                                                                                                                                                                                                  |
| <i>Children born preterm or at term</i>                            |                                                                                                                                                                                                                                                                                                                                                                                      |                                                                                                                                                                                                                                                  |
| Lamminmaki 2021<br>(Finland) <sup>11</sup><br>★★★★★½               | <ul style="list-style-type: none"> <li>• Preterm &amp; term</li> <li>• Matched controls for sex, GA ±6 days, and date of birth ±3 days</li> </ul>                                                                                                                                                                                                                                    | <ul style="list-style-type: none"> <li>• NS</li> </ul>                                                                                                                                                                                           |
| Raikkonen, 2020<br>(Finland) <sup>12</sup><br>★★★★★½               | <ul style="list-style-type: none"> <li>• Singletons</li> <li>• Valid maternal and child personal identification codes for register data linkage</li> <li>• Available data on GA at birth</li> <li>• Survived until end of 1<sup>st</sup> year of life</li> </ul>                                                                                                                     | <ul style="list-style-type: none"> <li>• NS</li> </ul>                                                                                                                                                                                           |
| Wolford, 2020 (Finland) <sup>13</sup><br>★★★★★                     | <ul style="list-style-type: none"> <li>• Singleton live-born infants</li> <li>• Women with known risk factors for PE and IUGR</li> <li>• Women with no known risk factors</li> </ul>                                                                                                                                                                                                 | <ul style="list-style-type: none"> <li>• NS</li> </ul>                                                                                                                                                                                           |
| <i>Children born preterm</i>                                       |                                                                                                                                                                                                                                                                                                                                                                                      |                                                                                                                                                                                                                                                  |
| Haslam, 2018 (Canada) <sup>14</sup><br>★★★★★½                      | <ul style="list-style-type: none"> <li>• Born at 23-28 weeks GA and admitted to a NICU</li> <li>• Included data on race/ethnicity of all children at baseline [n=2187] <ul style="list-style-type: none"> <li>○ First Nations (n=77)</li> <li>○ East Asian (n=60)</li> <li>○ South Asian (n=144)</li> <li>○ White (n=1260)</li> <li>○ “Other/unknown” (n=646)</li> </ul> </li> </ul> | <ul style="list-style-type: none"> <li>• Stillborn</li> <li>• Moribund</li> <li>• Major congenital anomalies,</li> <li>• Admitted to NICU &gt;24h after birth</li> </ul>                                                                         |
| Aviram, 2021<br>(Canada) <sup>15</sup><br>★★★★★                    | <ul style="list-style-type: none"> <li>• Singletons</li> <li>• Live births</li> <li>• 34-36 weeks and 6 days GA</li> </ul>                                                                                                                                                                                                                                                           | <ul style="list-style-type: none"> <li>• Multi-fetal gestations</li> <li>• Genetic or major structural abnormalities,</li> <li>• Deliveries complicated by intrapartum asphyxia</li> <li>• No data on exposure to ACS/other variables</li> </ul> |
| Raikkonen, 2020<br>(Finland) <sup>12</sup><br>★★★★★½               | <ul style="list-style-type: none"> <li>• Singletons</li> <li>• Valid maternal and child personal identification codes for register data linkage</li> <li>• Available data on GA at birth</li> <li>• Survived until end of 1<sup>st</sup> year of life</li> </ul>                                                                                                                     | <ul style="list-style-type: none"> <li>• NS</li> </ul>                                                                                                                                                                                           |

| Study (country)<br>[Risk of bias<br>assessment] | Inclusion criteria                                                                                                                                                                                                                                                                                                                           | Exclusion criteria                                                                                                                                                                                                                                                                                         |
|-------------------------------------------------|----------------------------------------------------------------------------------------------------------------------------------------------------------------------------------------------------------------------------------------------------------------------------------------------------------------------------------------------|------------------------------------------------------------------------------------------------------------------------------------------------------------------------------------------------------------------------------------------------------------------------------------------------------------|
| Gentle, 2020 (U.S.) <sup>16</sup><br>★★★★★★     | <ul style="list-style-type: none"> <li>• Born at 22-26 weeks GA</li> <li>• Included data on race/ethnicity of children at baseline [ACS group, n=2752; unexposed group, n=341] <ul style="list-style-type: none"> <li>○ “Non-white race” in ACS group (n=1343)</li> <li>○ “Non-white race” in unexposed group (n=186)</li> </ul> </li> </ul> | <ul style="list-style-type: none"> <li>• Major congenital anomaly</li> <li>• Death occurred in first 12h after birth without receiving delivery room resuscitation (no ventilation, intubation or medications)</li> </ul>                                                                                  |
| Hutcheon, 2020<br>(Canada) <sup>17</sup> ★★★★★★ | <ul style="list-style-type: none"> <li>• GA 31-36 weeks and 6 days</li> </ul>                                                                                                                                                                                                                                                                | <ul style="list-style-type: none"> <li>• Children moved out of province before age 4</li> <li>• Births with no ultrasound confirmed- or revised- estimate of GA in days</li> <li>•</li> </ul>                                                                                                              |
| Bulbul, 2020 (Turkey) <sup>18</sup><br>★★★★★½   | <ul style="list-style-type: none"> <li>• ≤34 weeks GA from participating hospital</li> </ul>                                                                                                                                                                                                                                                 | <ul style="list-style-type: none"> <li>• Babies born in other centers and referred to participating hospital</li> <li>• Congenital major anomaly or congenital metabolic disease</li> </ul>                                                                                                                |
| Miyazaki, 2015 (Japan) <sup>19</sup><br>★★★★★½  | <ul style="list-style-type: none"> <li>• VLBW neonates born in tertiary perinatal centers</li> <li>•</li> </ul>                                                                                                                                                                                                                              | <ul style="list-style-type: none"> <li>• Multiple pregnancies</li> <li>• GA &gt;31 weeks</li> <li>• Major congenital malformations</li> <li>• Hospitalization following an out-of-hospital birth</li> <li>• No pathological examination of the placenta</li> </ul>                                         |
| Ushida, 2020a (Japan) <sup>20</sup><br>★★★★★½   | <ul style="list-style-type: none"> <li>• BW ≤1,500g and born at 24-31 weeks GA</li> <li>• Women with complete data about maternal and neonatal characteristics</li> </ul>                                                                                                                                                                    | <ul style="list-style-type: none"> <li>• &lt;24 weeks GA</li> <li>• Children from higher order multiple births (triplets, quadruplets)</li> <li>• Major congenital abnormalities</li> <li>• Transfer from other facilities</li> <li>• Co-twin fetal death</li> <li>• Incomplete medical records</li> </ul> |
| Ushida, 2020b (Japan) <sup>21</sup><br>★★★★★½   | <ul style="list-style-type: none"> <li>• BW ≤1,500g and born at 24-31 weeks GA</li> </ul>                                                                                                                                                                                                                                                    | <ul style="list-style-type: none"> <li>• &lt;24 weeks GA</li> <li>• Multiple pregnancies</li> <li>• Major congenital abnormalities</li> <li>• Out of hospital births</li> <li>• Incomplete medical records</li> </ul>                                                                                      |

| <b>Study (country)<br/>[Risk of bias<br/>assessment]</b>    | <b>Inclusion criteria</b>                                                                                                                                                                                                                 | <b>Exclusion criteria</b>                                                                                                                                                                                                                                                                |
|-------------------------------------------------------------|-------------------------------------------------------------------------------------------------------------------------------------------------------------------------------------------------------------------------------------------|------------------------------------------------------------------------------------------------------------------------------------------------------------------------------------------------------------------------------------------------------------------------------------------|
| Basset, 2018 (France) <sup>22</sup><br>★★★★★                | <ul style="list-style-type: none"> <li>• Born at 24-33 weeks GA</li> <li>• Born in 1 of 24 maternity clinics and hospitalized in 1 of the 3 NICUs</li> <li>• Remaining alive until discharge and enrolled in follow-up program</li> </ul> | <ul style="list-style-type: none"> <li>• Missing data regarding ACS or birth head circumference</li> <li>• Genetic abnormalities or malformations</li> <li>• Extreme birth weight/head circumference (<math>ZS \leq 3</math> or <math>&gt;3</math>)</li> </ul>                           |
| Ishikawa, 2015 (Japan) <sup>23</sup><br>★★★★★½              | <ul style="list-style-type: none"> <li>• BW &lt;1500g</li> <li>• SGA</li> </ul>                                                                                                                                                           | <ul style="list-style-type: none"> <li>• Multiple pregnancies</li> <li>• &gt;34 weeks GA or uncertain GA</li> <li>• Uncertain administration of ACS</li> <li>• Major congenital malformation</li> <li>• Hospitalization following an out-of-hospital birth</li> </ul>                    |
| Li, 2019 (China) <sup>24</sup><br>★★★★★½                    | <ul style="list-style-type: none"> <li>• Extremely preterm (&lt;28 weeks GA)</li> </ul>                                                                                                                                                   | <ul style="list-style-type: none"> <li>• NS</li> </ul>                                                                                                                                                                                                                                   |
| Ochiai, 2014 (Japan) <sup>25</sup><br>★★★★★½                | <ul style="list-style-type: none"> <li>• Born at 22-24 weeks GA</li> </ul>                                                                                                                                                                | <ul style="list-style-type: none"> <li>• NS</li> </ul>                                                                                                                                                                                                                                   |
| Young, 2016 (Canada) <sup>26</sup><br>★★★★★½                | <ul style="list-style-type: none"> <li>• Born <math>\leq 32</math> weeks GA</li> <li>• From participating NICU</li> </ul>                                                                                                                 | <ul style="list-style-type: none"> <li>• Known chromosomal or major congenital abnormality</li> </ul>                                                                                                                                                                                    |
| Kallen, 2015 (Sweden) <sup>27</sup><br>★★★★★½               | <ul style="list-style-type: none"> <li>• Live-born infants (including multiple births and infants with malformations)</li> </ul>                                                                                                          | <ul style="list-style-type: none"> <li>• Stillborn</li> <li>• Infants born outside the country and transferred after birth for neonatal care</li> </ul>                                                                                                                                  |
| Kiechl-Kohlendorfer, 2009 (Austria) <sup>28</sup><br>★★★★★½ | <ul style="list-style-type: none"> <li>• Born &lt;32 weeks GA</li> <li>• Born at included NICU</li> </ul>                                                                                                                                 | <ul style="list-style-type: none"> <li>• Died before or after discharge</li> <li>• Hospitalization following an out-of-hospital birth</li> <li>• Major congenital anomalies</li> </ul>                                                                                                   |
| Sun, 2015 (China) <sup>29</sup><br>★★★★★½                   | <ul style="list-style-type: none"> <li>• Born &lt;32 weeks GA/ birth weight &lt;1,500 g</li> <li>• Respiratory distress syndrome requiring mechanical ventilation less than 24 hours of life</li> </ul>                                   | <ul style="list-style-type: none"> <li>• Genetic or metabolic diseases</li> <li>• Congenital abnormalities</li> <li>• Pneumothorax</li> </ul>                                                                                                                                            |
| <i>Children born at term</i>                                |                                                                                                                                                                                                                                           |                                                                                                                                                                                                                                                                                          |
| Melamed, 2019 (Canada) <sup>30</sup><br>★★★★★★★             | <ul style="list-style-type: none"> <li>• Singleton infants</li> <li>• Born term (<math>\geq 37</math> weeks GA) in Ontario</li> </ul>                                                                                                     | <ul style="list-style-type: none"> <li>• Multiple gestations</li> <li>• Cases complicated by intrapartum asphyxia (umbilical artery pH&lt;7.1)</li> <li>• Genetic or major structural abnormalities</li> <li>• Data on exposure to ACS or on other variables were unavailable</li> </ul> |

| Study (country)<br>[Risk of bias<br>assessment]      | Inclusion criteria                                                                                                                                                                                                                                               | Exclusion criteria                                     |
|------------------------------------------------------|------------------------------------------------------------------------------------------------------------------------------------------------------------------------------------------------------------------------------------------------------------------|--------------------------------------------------------|
| Raikkonen, 2020<br>(Finland) <sup>12</sup><br>★★★★★½ | <ul style="list-style-type: none"> <li>• Singletons</li> <li>• Valid maternal and child personal identification codes for register data linkage</li> <li>• Available data on GA at birth</li> <li>• Survived until end of 1<sup>st</sup> year of life</li> </ul> | <ul style="list-style-type: none"> <li>• NS</li> </ul> |

**Legend:**

ACS – antenatal corticosteroids; PTB – preterm birth; VLBW – very low birth weight; g – grams; GA – gestational age; LMP – last menstrual period; BW – birth weight; h – hours; NS – not stated/defined; mg – milligrams; NICHD – Eunice Kennedy Shriver National Institute of Child Health and Human Development; IQR – interquartile ratio; PE – preeclampsia; IUGR – intrauterine growth restriction; SD – standard deviation; NICU – neonatal intensive care unit; ZS – z-score; SGA – small for gestational age; RDS – respiratory distress syndrome; PAO<sub>2</sub> – partial pressure of oxygen ration; FIO<sub>2</sub> – fraction of inspired oxygen ration

Newcastle-Ottawa Scale: ★ – point awarded; ½ – half point awarded



**eTable 2.** Individual Adjusted Neurodevelopmental/Psychological Outcomes of Included Studies on a Single Course of Antenatal Corticosteroids vs. Non-Exposure in a Systematic Review and Meta-analysis of Long-Term Outcomes Associated with Preterm Exposure to Antenatal Corticosteroids

| Study (country) [Risk of bias assessment]  | Neurodevelopmental/psychological outcomes (with definitions when available)                                                                                                                                     | Single course of ACS (n/N) | Unexposed group (n/N) | Reported relative effect (95% CI) | Absolute effect (95% CI)                               | GRADE certainty          |
|--------------------------------------------|-----------------------------------------------------------------------------------------------------------------------------------------------------------------------------------------------------------------|----------------------------|-----------------------|-----------------------------------|--------------------------------------------------------|--------------------------|
| <i>Children born preterm</i>               |                                                                                                                                                                                                                 |                            |                       |                                   |                                                        |                          |
| Chawla, 2016 (U.S.) <sup>3</sup><br>★★★★★★ | Neurodevelopmental impairment <ul style="list-style-type: none"> <li>• moderate to severe cerebral palsy based on the GMFCS levels 3-5, a cognitive score &lt;85 on BSID-III, blindness, or deafness</li> </ul> | 651/2405                   | 166/419               | <b>Adj OR: 0.70 (0.55-0.89)</b>   | <b>81 fewer per 1,000</b> (from 131 fewer to 28 fewer) | Meta-analyzed (Table 2)  |
|                                            | Blindness <ul style="list-style-type: none"> <li>• bilateral visual acuity of 20/200 or less</li> </ul>                                                                                                         | 12/2402                    | 1/417                 | Adj OR: 2.73 (0.34-21.76)         | 4 more per 1,000 (from 2 fewer to 47 more)             | Meta-analyzed (eTable 6) |
|                                            | Deafness <ul style="list-style-type: none"> <li>• hearing impairment despite amplification or cochlear implants</li> </ul>                                                                                      | 31/2405                    | 10/418                | Adj OR: 0.58 (0.28-1.23)          | 10 fewer per 1,000 (from 17 fewer to 5 more)           | Meta-analyzed (eTable 6) |
|                                            | Any cerebral palsy                                                                                                                                                                                              | 252/2404                   | 73/418                | <b>Adj OR: 0.51 (0.38-0.70)</b>   | <b>77 fewer per 1,000</b> (from 100 fewer to 46 fewer) | Meta-analyzed (eTable 6) |
|                                            | Moderate to severe cerebral palsy <ul style="list-style-type: none"> <li>• GMFCS levels 3-5</li> </ul>                                                                                                          | 126/2404                   | 26/418                | Adj OR: 0.87 (0.55-1.37)          | 8 fewer per 1,000 (from 27 fewer to 21 more)           | Meta-analyzed (eTable 6) |

| Study (country) [Risk of bias assessment] | Neurodevelopmental/psychological outcomes (with definitions when available)                                                                    | Single course of ACS (n/N)                                                                          | Unexposed group (n/N) | Reported relative effect (95% CI)                                                                                                                          | Absolute effect (95% CI)                                                                                                                                         | GRADE certainty               |
|-------------------------------------------|------------------------------------------------------------------------------------------------------------------------------------------------|-----------------------------------------------------------------------------------------------------|-----------------------|------------------------------------------------------------------------------------------------------------------------------------------------------------|------------------------------------------------------------------------------------------------------------------------------------------------------------------|-------------------------------|
|                                           | BSID-III cognitive score <70                                                                                                                   | 192/2396                                                                                            | 53/419                | Adj OR: 0.72 (0.51-1.01)                                                                                                                                   | 32 fewer per 1,000 (from 58 fewer to 1 more)                                                                                                                     | ⊕○○○<br>Very low <sup>a</sup> |
|                                           | BSID-III cognitive score 70-84                                                                                                                 | 423/2396                                                                                            | 109/419               | <b>Adj OR: 0.76 (0.59-0.99)</b>                                                                                                                            | <b>49 fewer per 1,000</b> (from 88 fewer to 2 fewer)                                                                                                             | ⊕⊕○○<br>Low                   |
|                                           | BSID-III cognitive score <85                                                                                                                   | 615/2396                                                                                            | 162/419               | <b>Adj OR: 0.69 (0.54-0.87)</b>                                                                                                                            | <b>84 fewer per 1,000</b> (from 133 fewer to 32 fewer)                                                                                                           | Meta-analyzed (eTable 6)      |
| Lee, 2008 (U.S.) <sup>4</sup><br>★★★★★½   | Neurodevelopmental impairment <ul style="list-style-type: none"> <li>cerebral palsy, MDI &lt;70, PDI &lt;70, deafness, or blindness</li> </ul> | <ul style="list-style-type: none"> <li><i>Dex</i>: 167/408</li> <li><i>Beta</i>: 191/563</li> </ul> | 69/153                | <ul style="list-style-type: none"> <li><i>Dex v none</i>; Adj OR: 0.74 (0.48-1.15)</li> <li><i>Beta v none</i>; <b>Adj OR: 0.63 (0.41-0.97)</b></li> </ul> | <ul style="list-style-type: none"> <li>73 fewer per 1,000 (from 168 fewer to 35 more)</li> <li><b>110 fewer per 1,000</b> (from 199 fewer to 8 fewer)</li> </ul> | Meta-analyzed (Table 2)       |

| Study (country) [Risk of bias assessment] | Neurodevelopmental/psychological outcomes (with definitions when available)                 | Single course of ACS (n/N)                                                                        | Unexposed group (n/N) | Reported relative effect (95% CI)                                                                                                                          | Absolute effect (95% CI)                                                                                                                                     | GRADE certainty          |
|-------------------------------------------|---------------------------------------------------------------------------------------------|---------------------------------------------------------------------------------------------------|-----------------------|------------------------------------------------------------------------------------------------------------------------------------------------------------|--------------------------------------------------------------------------------------------------------------------------------------------------------------|--------------------------|
|                                           | Blindness <ul style="list-style-type: none"> <li>20/200 visual acuity or less</li> </ul>    | <ul style="list-style-type: none"> <li><i>Dex</i>: 4/408</li> <li><i>Beta</i>: 5/563</li> </ul>   | 1/153                 | <ul style="list-style-type: none"> <li><i>Dex v none</i>; Adj OR: 1.51 (0.17-13.61)</li> <li><i>Beta v none</i>; Adj OR: 1.36 (0.16-11.77)</li> </ul>      | <ul style="list-style-type: none"> <li>110 fewer per 1,000 (from 199 fewer to 8 fewer)</li> <li>2 more per 1,000 (from 5 fewer to 65 more)</li> </ul>        | Meta-analyzed (eTable 6) |
|                                           | Deafness <ul style="list-style-type: none"> <li>use of hearing aids in both ears</li> </ul> | <ul style="list-style-type: none"> <li><i>Dex</i>: 13/408</li> <li><i>Beta</i>: 5/563</li> </ul>  | 5/153                 | <ul style="list-style-type: none"> <li><i>Dex v none</i>; Adj OR: 0.85 (0.28-2.59)</li> <li><i>Beta v none</i>; Adj OR: <b>0.22 (0.06-0.82)</b></li> </ul> | <ul style="list-style-type: none"> <li>5 fewer per 1,000 (from 23 fewer to 48 more)</li> <li><b>25 fewer per 1,000</b> (from 31 fewer to 6 fewer)</li> </ul> | Meta-analyzed (eTable 6) |
|                                           | Cerebral palsy                                                                              | <ul style="list-style-type: none"> <li><i>Dex</i>: 55/408</li> <li><i>Beta</i>: 56/563</li> </ul> | 20/153                | <ul style="list-style-type: none"> <li><i>Dex v none</i>; Adj OR: 0.91 (0.46-1.80)</li> <li><i>Beta v none</i>; Adj OR: 0.67 (0.34-1.33)</li> </ul>        | <ul style="list-style-type: none"> <li>10 fewer per 1,000 (from 66 fewer to 82 more)</li> <li>39 fewer per 1,000 (from 82 fewer to 36 more)</li> </ul>       | Meta-analyzed (eTable 6) |

| Study (country) [Risk of bias assessment] | Neurodevelopmental/psychological outcomes (with definitions when available) | Single course of ACS (n/N)                                                                              | Unexposed group (n/N) | Reported relative effect (95% CI)                                                                                                                       | Absolute effect (95% CI)                                                                                                                                     | GRADE certainty                                                           |
|-------------------------------------------|-----------------------------------------------------------------------------|---------------------------------------------------------------------------------------------------------|-----------------------|---------------------------------------------------------------------------------------------------------------------------------------------------------|--------------------------------------------------------------------------------------------------------------------------------------------------------------|---------------------------------------------------------------------------|
|                                           | Moderate or severe cerebral palsy                                           | <ul style="list-style-type: none"> <li>• <i>Dex</i>: 29/408</li> <li>• <i>Beta</i>: 30/563</li> </ul>   | 10/153                | <ul style="list-style-type: none"> <li>• <i>Dex v none</i>; Adj OR: 0.86 (0.34-2.15)</li> <li>• <i>Beta v none</i>; Adj OR: 0.61 (0.25-1.51)</li> </ul> | <ul style="list-style-type: none"> <li>• 9 fewer per 1,000 (from 42 fewer to 65 more)</li> <li>• 24 fewer per 1,000 (from 48 fewer to 30 more)</li> </ul>    | Meta-analyzed (eTable 6)                                                  |
|                                           | BSID-II MDI <70                                                             | <ul style="list-style-type: none"> <li>• <i>Dex</i>: 135/408</li> <li>• <i>Beta</i>: 163/563</li> </ul> | 58/153                | <ul style="list-style-type: none"> <li>• <i>Dex v none</i>; Adj OR: 0.73 (0.46-1.15)</li> <li>• <i>Beta v none</i>; Adj OR: 0.70 (0.45-1.09)</li> </ul> | <ul style="list-style-type: none"> <li>• 71 fewer per 1,000 (from 160 fewer to 33 more)</li> <li>• 80 fewer per 1,000 (from 164 fewer to 20 more)</li> </ul> | <p>⊕○○○<br/>Very low<sup>a</sup></p> <p>⊕○○○<br/>Very low<sup>a</sup></p> |
|                                           | BSID-II PDI <70                                                             | <ul style="list-style-type: none"> <li>• <i>Dex</i>: 98/408</li> <li>• <i>Beta</i>: 107/563</li> </ul>  | 31/153                | <ul style="list-style-type: none"> <li>• <i>Dex v none</i>; Adj OR: 1.25 (0.71-2.18)</li> <li>• <i>Beta v none</i>; Adj OR: 0.89 (0.51-1.55)</li> </ul> | <ul style="list-style-type: none"> <li>• 38 more per 1,000 (from 50 fewer to 154 more)</li> <li>• 18 fewer per 1,000 (from 88 fewer to 80 more)</li> </ul>   | <p>⊕○○○<br/>Very low<sup>a</sup></p> <p>⊕○○○<br/>Very low<sup>a</sup></p> |

| Study (country) [Risk of bias assessment]       | Neurodevelopmental/psychological outcomes (with definitions when available)                                                                                                      | Single course of ACS (n/N)                                                                          | Unexposed group (n/N) | Reported relative effect (95% CI)                                                                                                                          | Absolute effect (95% CI)                                                                                                                                      | GRADE certainty                                          |
|-------------------------------------------------|----------------------------------------------------------------------------------------------------------------------------------------------------------------------------------|-----------------------------------------------------------------------------------------------------|-----------------------|------------------------------------------------------------------------------------------------------------------------------------------------------------|---------------------------------------------------------------------------------------------------------------------------------------------------------------|----------------------------------------------------------|
|                                                 | Unimpaired <ul style="list-style-type: none"> <li>the absence of the following: cerebral palsy, blindness, deafness, MDI <math>\geq</math>85, PDI <math>\geq</math>85</li> </ul> | <ul style="list-style-type: none"> <li><i>Dex</i>: 106/408</li> <li><i>Beta</i>: 225/563</li> </ul> | 32/153                | <ul style="list-style-type: none"> <li><i>Dex v none</i>; Adj OR: 1.50 (0.91-2.48)</li> <li><i>Beta v none</i>; <b>Adj OR: 2.42 (1.49-3.91)</b></li> </ul> | <ul style="list-style-type: none"> <li>75 more per 1,000 (from 15 fewer to 187 more)</li> <li><b>181 more per 1,000</b> (from 74 more to 299 more)</li> </ul> | <p>⊕○○○<br/>Very low<sup>a</sup></p> <p>⊕⊕○○<br/>Low</p> |
| Laughon, 2007 (Unspecified) <sup>7</sup> ★★★★★½ | BSID-II PDI score <55                                                                                                                                                            | 71/588                                                                                              | 4/93                  | <b>Adj OR: 2.3 (1.5-3.5)</b>                                                                                                                               | <b>51 more per 1,000</b> (from 20 more to 93 more)                                                                                                            | ⊕○○○<br>Very low <sup>a,b</sup>                          |
| Lardon, 2017 (Spain) <sup>9</sup> ★★★★★½        | Visual sensory disorder <ul style="list-style-type: none"> <li>myopia, loss of vision or strabismus</li> </ul>                                                                   | 17/134                                                                                              | 4/37                  | Adj OR: 1.08 (0.28-4.17)                                                                                                                                   | 8 more per 1,000 (from 75 fewer to 228 more)                                                                                                                  | Meta-analyzed (eTable 6)                                 |
|                                                 | Auditory sensory disorder <ul style="list-style-type: none"> <li>sensorineural deafness</li> </ul>                                                                               | 10/134                                                                                              | 2/37                  | Adj OR: 1.19 (0.22-6.26)                                                                                                                                   | 10 more per 1,000 (from 42 fewer to 209 more)                                                                                                                 | Meta-analyzed (eTable 6)                                 |
|                                                 | Behavioral/conduct disorder <ul style="list-style-type: none"> <li>autism spectrum disorder</li> </ul>                                                                           | 6/134                                                                                               | 2/37                  | Adj OR: 0.72 (0.13-4.01)                                                                                                                                   | 15 fewer per 1,000 (from 47 fewer to 132 more)                                                                                                                | ⊕○○○<br>Very low <sup>a,b</sup>                          |

| Study (country) [Risk of bias assessment] | Neurodevelopmental/psychological outcomes (with definitions when available)                                                                                                                         | Single course of ACS (n/N) | Unexposed group (n/N) | Reported relative effect (95% CI) | Absolute effect (95% CI)                        | GRADE certainty              |
|-------------------------------------------|-----------------------------------------------------------------------------------------------------------------------------------------------------------------------------------------------------|----------------------------|-----------------------|-----------------------------------|-------------------------------------------------|------------------------------|
|                                           | Motor disorder <ul style="list-style-type: none"> <li>mild neuromotor disorder, diparesis, hemiparesis or tetraparesis</li> </ul>                                                                   | 25/134                     | 7/37                  | Adj OR: 0.59 (0.25-1.38)          | 68 fewer per 1,000 (from 134 fewer to 54 more)  | ⊕○○○ Very low <sup>a,b</sup> |
|                                           | Cognitive delay                                                                                                                                                                                     | 62/134                     | 18/37                 | Adj OR: 0.84(0.28-2.46)           | 43 fewer per 1,000 (from 277 fewer to 213 more) | ⊕○○○ Very low <sup>a,b</sup> |
|                                           | Multiple deficiency <ul style="list-style-type: none"> <li>profound intellectual deficiency associated with more or less severe motor disturbances or sensory or behavioral disturbances</li> </ul> | 5/134                      | 1/37                  | Adj OR 1.60 (0.14-18.3)           | 16 more per 1,000 (from 23 fewer to 310 more)   | ⊕○○○ Very low <sup>a,b</sup> |

**Legend:**

ACS – antenatal corticosteroids; SD – standard deviation; CI – confidence interval; BSID – Bayley Scales of Infant and Toddler Development; NS – not stated/defined; adj – adjusted; OR – odds ratio; GMFCS – Gross Motor Function Classification System; MDI – mental development index; PDI – psychomotor development index; Dex – dexamethasone; Beta – betamethasone; v – versus

Newcastle-Ottawa Scale: ★ – point awarded, ½ – half point awarded

GRADE Assessment: Low rating indicates no serious concerns in GRADE domains and no other considerations were made; a–serious rating for imprecision due to small sample size/wide 95% CI's; b–serious rating for risk of bias due to low Newcastle-Ottawa scale rating (i.e., <6 stars).

**Green font**– a statistically significant beneficial outcome, **grey highlighting** – not measured/reported, **red font**– a statistically significant harmful outcome

**eTable 3.** Individual Unadjusted Neurodevelopmental/Psychological Outcomes of Included Studies on a Single Course of Antenatal Corticosteroids vs. Non-Exposure in a Systematic Review and Meta-analysis of Long-Term Outcomes Associated with Preterm Exposure to Antenatal Corticosteroids

| Study (country) [Risk of bias assessment]   | Neurodevelopmental/psychological outcomes (with definitions when available)                                                                                                                                     | Single course of ACS (n/N) or Mean (SD) | Unexposed group (n/N) or Mean (SD) | Reported effect measure & size (95% CI)                | GRADE certainty               |
|---------------------------------------------|-----------------------------------------------------------------------------------------------------------------------------------------------------------------------------------------------------------------|-----------------------------------------|------------------------------------|--------------------------------------------------------|-------------------------------|
| <i>Children born preterm</i>                |                                                                                                                                                                                                                 |                                         |                                    |                                                        |                               |
| Chawla, 2013 (U.S.) <sup>1</sup><br>★★★★★★  | Neurodevelopmental impairment <ul style="list-style-type: none"> <li>• moderate to severe cerebral palsy based on the GMFCS levels 3-5, a cognitive score &lt;85 on BSID-III, blindness, or deafness</li> </ul> | 16/51                                   | 3/8                                | p=0.08                                                 | Meta-analyzed (eTable 6)      |
|                                             | Blindness <ul style="list-style-type: none"> <li>• bilateral visual acuity of 20/200 or less</li> </ul>                                                                                                         | 0/51                                    | 0/8                                | p=0.15                                                 | Meta-analyzed (eTable 6)      |
|                                             | Deafness <ul style="list-style-type: none"> <li>• the need for bilateral amplification or cochlear implants</li> </ul>                                                                                          | 3/51                                    | 0/8                                | p=0.47                                                 | Meta-analyzed (eTable 6)      |
|                                             | Any cerebral palsy                                                                                                                                                                                              | 13/51                                   | 3/8                                | p=0.27                                                 | Meta-analyzed (eTable 6)      |
|                                             | Moderate/severe cerebral palsy <ul style="list-style-type: none"> <li>• GMFCS levels 3-5</li> </ul>                                                                                                             | 7/51                                    | 1/8                                | p=0.82                                                 | Meta-analyzed (eTable 6)      |
|                                             | BSID-III MDI/cognitive score <70                                                                                                                                                                                | 14/51                                   | 3/8                                | p=0.68                                                 | ⊕○○○<br>Very low <sup>a</sup> |
|                                             | BSID-III MDI/cognitive score <85                                                                                                                                                                                | 27/51                                   | 5/8                                | p=0.13                                                 | Meta-analyzed (eTable 6)      |
| Agarwal, 2018 <sup>5</sup> (India)<br>★★★★★ | Neurodevelopmental impairment <ul style="list-style-type: none"> <li>• presence of neurosensory impairment (cerebral palsy, deafness, or blindness) or with BSID-III score &lt;70 in any domain</li> </ul>      | NS                                      | NS                                 | Lack of ACS:<br><b>unadjusted OR: 2.91 (1.21-7.00)</b> | ⊕○○○<br>Very low <sup>a</sup> |
|                                             | Abnormal cognition<br>significant delay: <70 on the BSID-III cognitive scores                                                                                                                                   | 1/122                                   | 8/43                               | Lack of ACS:<br><b>unadjusted OR: 41.5 (3.5-485.7)</b> | ⊕○○○<br>Very low <sup>a</sup> |

| Study (country) [Risk of bias assessment]          | Neurodevelopmental/psychological outcomes (with definitions when available)                                                                                                                                                                                                                | Single course of ACS (n/N) or Mean (SD) | Unexposed group (n/N) or Mean (SD) | Reported effect measure & size (95% CI)          | GRADE certainty                 |
|----------------------------------------------------|--------------------------------------------------------------------------------------------------------------------------------------------------------------------------------------------------------------------------------------------------------------------------------------------|-----------------------------------------|------------------------------------|--------------------------------------------------|---------------------------------|
|                                                    | Abnormal language significant delay: <70 on the BSID-III language score                                                                                                                                                                                                                    | 15/122                                  | 14/43                              | Lack of ACS: <b>unadjusted OR: 2.8 (1.1-7.4)</b> | ⊕○○○<br>Very low <sup>a</sup>   |
| Kim, 2018 (Korea) <sup>6</sup><br>★★★★★½           | Neurodevelopmental impairment <ul style="list-style-type: none"> <li>cerebral palsy GMFCS level ≥ II, MDI&lt;70 on BSID-II or cognitive score &lt;85 on BSID-III, suspicion of developmental delay on Denver Developmental Screening test, blindness or use of cochlear implant</li> </ul> | 24/25                                   | 15/16                              | p=0.197                                          | Meta-analyzed (eTable 6)        |
|                                                    | Cerebral palsy <ul style="list-style-type: none"> <li>Any level using the GMFCS</li> </ul>                                                                                                                                                                                                 | 14/27<br>≥ level III: 0/26              | 9/18<br>≥ level III: 1/18          | p=0.659<br>≥ level III: p=0.171                  | Meta-analyzed (eTable 6)        |
|                                                    | Developmental delay by BSID or Denver Developmental Screening test                                                                                                                                                                                                                         | 24/25                                   | 14/17                              | p=0.162                                          | ⊕○○○<br>Very low <sup>a,b</sup> |
| Laughon, 2007 (Unspecified) <sup>7</sup><br>★★★★★½ | BSID-II MDI score <55                                                                                                                                                                                                                                                                      | 71/588                                  | 10/93                              |                                                  | ⊕○○○<br>Very low <sup>a,b</sup> |
|                                                    | BSID-II MDI score of 55-59                                                                                                                                                                                                                                                                 | 65/588                                  | 8/93                               |                                                  | ⊕○○○<br>Very low <sup>a,b</sup> |
|                                                    | BSID-II PDI score of 55-59                                                                                                                                                                                                                                                                 | 88/588                                  | 14/93                              |                                                  | ⊕○○○<br>Very low <sup>a,b</sup> |
| McElrath, 2009 (U.S.) <sup>8</sup><br>★★★★★½       | Quadriplegia                                                                                                                                                                                                                                                                               | 6/681                                   | 8/113                              |                                                  | ⊕○○○<br>Very low <sup>a,b</sup> |
|                                                    | Diparesis                                                                                                                                                                                                                                                                                  | 4/681                                   | 4/113                              |                                                  | Meta-analyzed (eTable 6)        |
|                                                    | Hemiparesis                                                                                                                                                                                                                                                                                | 2/681                                   | 0/113                              |                                                  | Meta-analyzed (eTable 6)        |
| Lardon, 2017 (Spain) <sup>9</sup><br>★★★★★½        | Mild motor disorder                                                                                                                                                                                                                                                                        | 16/134                                  | 3/37                               |                                                  | ⊕○○○<br>Very low <sup>a,b</sup> |
|                                                    | Diparesis                                                                                                                                                                                                                                                                                  | 4/134                                   | 1/37                               |                                                  | Meta-analyzed (eTable 6)        |



| Study (country) [Risk of bias assessment]   | Neurodevelopmental/psychological outcomes (with definitions when available) | Single course of ACS (n/N) or Mean (SD) | Unexposed group (n/N) or Mean (SD) | Reported effect measure & size (95% CI) | GRADE certainty                 |
|---------------------------------------------|-----------------------------------------------------------------------------|-----------------------------------------|------------------------------------|-----------------------------------------|---------------------------------|
|                                             | Hemiparesis                                                                 | 3/134                                   | 1/37                               |                                         | Meta-analyzed (eTable 6)        |
|                                             | Tetraparesis                                                                | 2/134                                   | 2/37                               |                                         | ⊕○○○<br>Very low <sup>a,b</sup> |
|                                             | Mild cognitive delay                                                        | 55/134                                  | 15/37                              |                                         | ⊕○○○<br>Very low <sup>a,b</sup> |
|                                             | Moderate cognitive delay                                                    | 6/134                                   | 3/37                               |                                         | ⊕○○○<br>Very low <sup>a,b</sup> |
|                                             | Serious cognitive delay                                                     | 1/134                                   | 0/37                               |                                         | ⊕○○○<br>Very low <sup>a,b</sup> |
| Tseng, 2016 (Taiwan) <sup>10</sup><br>★★★★½ | BSID-II MDI score                                                           | 90.38 (3.31)                            | 79.94 (3.58)                       | p=0.043                                 | ⊕○○○<br>Very low <sup>a,b</sup> |
|                                             | BSID-II PDI score                                                           | 78.17 (3.81)                            | 76.13 (4.51)                       | p>0.05                                  | ⊕○○○<br>Very low <sup>a,b</sup> |
|                                             | MDI <70 on the BSID-II scale                                                | 3/24                                    | 3/16                               | p>0.05                                  | Meta-analyzed (eTable 6)        |

**Legend:**

ACS – antenatal corticosteroids; SD – standard deviation; CI – confidence interval; BSID – Bayley Scales of Infant and Toddler Development; NS – not stated/defined; adj – adjusted; OR – odds ratio; GMFCS – Gross Motor Function Classification System; MDI – mental development index; PDI – psychomotor development index; Dex – dexamethasone; Beta – betamethasone; v – versus

Newcastle-Ottawa Scale: ★ – point awarded, ½ – half point awarded

GRADE Assessment: Low rating indicates no serious concerns in GRADE domains and no other considerations were made; a–serious rating for imprecision due to small sample size/wide 95% CI's; b–serious rating for risk of bias due to low Newcastle-Ottawa scale rating (i.e., <6 stars). For pooled outcomes refer to eTable 6.

**Green font**– a statistically significant beneficial outcome, **grey highlighting** – not measured/reported, **red font**– a statistically significant harmful outcome

**eTable 4.** Individual Adjusted Neurodevelopmental/Psychological Outcomes of Included Studies on an Unspecified Number of Courses of Antenatal Corticosteroids vs. Non-Exposure in a Systematic Review and Meta-analysis of Long-Term Outcomes Associated with Preterm Exposure to Antenatal Corticosteroids

| Study (country) [Risk of bias assessment]         | Neurodevelopmental/psychological outcomes (with definitions when available)                                                                                                                                                                                                                                                                                                                                                                                                                                                      | Unspecified number of courses of ACS (n/N)                               | Unexposed group (n/N)                                                   | Reported relative effect (95% CI)                                                                                                                                   | Absolute effect (95% CI)                                | GRADE certainty                                   |
|---------------------------------------------------|----------------------------------------------------------------------------------------------------------------------------------------------------------------------------------------------------------------------------------------------------------------------------------------------------------------------------------------------------------------------------------------------------------------------------------------------------------------------------------------------------------------------------------|--------------------------------------------------------------------------|-------------------------------------------------------------------------|---------------------------------------------------------------------------------------------------------------------------------------------------------------------|---------------------------------------------------------|---------------------------------------------------|
| <i>Children born preterm or at term</i>           |                                                                                                                                                                                                                                                                                                                                                                                                                                                                                                                                  |                                                                          |                                                                         |                                                                                                                                                                     |                                                         |                                                   |
| Lamminmaki 2021 (Finland) <sup>11</sup><br>★★★★★½ | Pre-school Activities Inventory Score <ul style="list-style-type: none"> <li>Psychometric scale to discriminate gender-typical behavior within and between sexes</li> </ul>                                                                                                                                                                                                                                                                                                                                                      | Mean (SD):<br>Male: 68.5 (10.6), n=171<br><br>Female: 27.5 (11.3), n=166 | Mean (SD):<br>Male: 68.6 (9.9), n=213<br><br>Female: 28.2 (10.0), n=186 | β=0.3, (-1.7 to 2.3); p=0.75<br><br>β = 1.3 (-1.1 to 3.6); p=0.29                                                                                                   |                                                         | ⊕⊕○○<br>Low                                       |
| Raikkonen, 2020 (Finland) <sup>12</sup><br>★★★★★½ | Any mental and behavioral disorder in all children born preterm/term <ul style="list-style-type: none"> <li><i>all consecutive sibling pairs discordant for treatment-exposure vs concordant for non-exposure</i></li> <li><i>younger treatment-exposed and older non-exposed vs both younger and older non-exposed</i></li> <li><i>all consecutive sibling pairs with first sibling pair discordant for treatment-exposure for each mother versus first sibling pair concordant for non-exposure for each mother</i></li> </ul> | 1785/14868                                                               | 42243/655229                                                            | <ul style="list-style-type: none"> <li><b>Adj HR: 1.38 (1.21-1.58)</b></li> <li><b>Adj HR: 1.53 (1.29-1.81)</b></li> <li><b>Adj HR: 1.36 (1.17-1.57)</b></li> </ul> |                                                         | ⊕⊕○○<br>Low<br><br>⊕⊕○○<br>Low<br><br>⊕⊕○○<br>Low |
|                                                   | Psychological development disorders                                                                                                                                                                                                                                                                                                                                                                                                                                                                                              | 956/14868                                                                | 19089/655229                                                            | <b>Adj HR: 1.31 (1.21-1.42)</b>                                                                                                                                     | <b>89 more per 10,000</b><br>(from 60 more to 120 more) | ⊕⊕○○<br>Low                                       |

| Study (country)<br>[Risk of bias<br>assessment] | Neurodevelopmental/psychological<br>outcomes<br>(with definitions when available)           | Unspecified<br>number of<br>courses of<br>ACS (n/N) | Unexposed<br>group<br>(n/N) | Reported<br>relative effect<br>(95% CI) | Absolute<br>effect (95%<br>CI)                                  | GRADE<br>certainty            |
|-------------------------------------------------|---------------------------------------------------------------------------------------------|-----------------------------------------------------|-----------------------------|-----------------------------------------|-----------------------------------------------------------------|-------------------------------|
|                                                 | Autism spectrum disorders                                                                   | 96/14868                                            | 2807/655229                 | Adj HR: 1.25<br>(0.99-1.58)             | 11 more per<br>10,000<br>(from 0 fewer<br>to 25 more)           | ⊕⊕○○<br>Low                   |
|                                                 | Attention-deficit/hyperactivity or conduct<br>disorders                                     | 216/14868                                           | 6773/655229                 | <b>Adj HR: 1.18<br/>(1.01-1.38)</b>     | <b>18 more per<br/>10,000</b><br>(from 1 more to<br>39 more)    | ⊕⊕○○<br>Low                   |
|                                                 | Mixed disorders of conduct and emotions;<br>emotional, social functioning, or tic disorders | 181/14868                                           | 6350/655229                 | <b>Adj HR: 1.20<br/>(1.02-1.42)</b>     | <b>19 more per<br/>10,000</b><br>(from 2 more to<br>40 more)    | ⊕⊕○○<br>Low                   |
|                                                 | Other behavioral and emotional disorders                                                    | 345/14868                                           | 8049/655229                 | <b>Adj HR: 1.16<br/>(1.02-1.32)</b>     | <b>19 more per<br/>10,000</b><br>(from 2 more to<br>39 more)    | ⊕⊕○○<br>Low                   |
|                                                 | Psychotic, mood, neurotic, stress-related, or<br>somatization disorders                     | 71/14868                                            | 2241/655229                 | Adj HR: 1.28<br>(0.98-1.67)             | 10 more per<br>10,000<br>(from 1 fewer<br>to 23 more)           | ⊕⊕○○<br>Low                   |
|                                                 | Eating disorders                                                                            | 6/14868                                             | 243/655229                  | Adj HR: 0.67<br>(0.31-1.47)             | 1 fewer per<br>10,000<br>(from 3 fewer<br>to 2 more)            | ⊕○○○<br>Very low <sup>a</sup> |
|                                                 | Sleep disorders                                                                             | 79/14868                                            | 2110/655229                 | <b>Adj HR: 1.52<br/>(1.18-1.96)</b>     | <b>17 more per<br/>10,000</b><br>(from 6 more to<br>31 more)    | ⊕⊕○○<br>Low                   |
|                                                 | Mild, moderate, unspecified intellectual<br>disability                                      | 101/14868                                           | 2259/655229                 | <b>Adj HR: 0.66<br/>(0.52-0.83)</b>     | <b>12 fewer per<br/>10,000</b><br>(from 17 fewer<br>to 6 fewer) | ⊕⊕○○<br>Low                   |

| Study (country)<br>[Risk of bias<br>assessment]    | Neurodevelopmental/psychological<br>outcomes<br>(with definitions when available)                                                                                                                                                                                                                         | Unspecified<br>number of<br>courses of<br>ACS (n/N) | Unexposed<br>group<br>(n/N) | Reported<br>relative effect<br>(95% CI)                                                    | Absolute<br>effect (95%<br>CI)                                             | GRADE<br>certainty             |
|----------------------------------------------------|-----------------------------------------------------------------------------------------------------------------------------------------------------------------------------------------------------------------------------------------------------------------------------------------------------------|-----------------------------------------------------|-----------------------------|--------------------------------------------------------------------------------------------|----------------------------------------------------------------------------|--------------------------------|
|                                                    | Severe, profound intellectual disability                                                                                                                                                                                                                                                                  | 18/14868                                            | 219/655229                  | Adj HR: 1.15<br>(0.63-2.12)                                                                | 1 more per<br>10,000<br>(from 1 fewer<br>to 4 more)                        | ⊕⊕○○<br>Low                    |
| Wolford, 2020<br>(Finland) <sup>13</sup><br>★★★★★★ | Disorders of psychological development                                                                                                                                                                                                                                                                    | 19/117                                              | 238/4591                    | <b>Adj OR: 3.57</b><br><b>(1.94-6.59)</b>                                                  | <b>1,115 more</b><br><b>per 10,000</b><br>(from 441 more<br>to 2,130 more) | ⊕○○○<br>Very low <sup>a</sup>  |
|                                                    | Behavioral and emotional disorders with onset<br>usually occurring in childhood and adolescence                                                                                                                                                                                                           | 14/117                                              | 184/4591                    | <b>Adj OR: 2.66</b><br><b>(1.30-5.46)</b>                                                  | <b>599 more per</b><br><b>10,000</b><br>(from 114 more<br>to 1,456 more)   | ⊕○○○<br>Very low <sup>a</sup>  |
| <i>Children born preterm</i>                       |                                                                                                                                                                                                                                                                                                           |                                                     |                             |                                                                                            |                                                                            |                                |
| Haslam, 2018<br>(Canada) <sup>14</sup><br>★★★★★★★½ | Severe neurodevelopmental impairment<br>at least one of the following: GMFCS 3-5,<br>BSID-III <-2 SD, hearing aid or cochlear<br>implant, bilaterally blind                                                                                                                                               | 276/1963                                            |                             | <b>Adj OR: 0.62</b><br><b>(0.39-0.98)</b>                                                  | N/A                                                                        | Meta-<br>analyzed<br>(Table 2) |
|                                                    | Severe neurodevelopmental impairment<br>at least one of the following: GMFCS 4-5,<br>BSID-III cognitive or language composite score<br><-3 SD, bilaterally blind                                                                                                                                          | 64/1963                                             |                             | Adj OR: 0.83<br>(0.40-1.73)                                                                | N/A                                                                        | ⊕○○○<br>Very low <sup>a</sup>  |
| Aviram, 2021<br>(Canada) <sup>15</sup><br>★★★★★★★  | Investigation for suspected neurocognitive<br>disorder <ul style="list-style-type: none"> <li>any physician service claim with a<br/>diagnosis code related to a suspected<br/>neurocognitive disorder</li> <li>after removing NICU admitted infants<br/>and BW &lt;10th percentile from model</li> </ul> | 1156/2689                                           | 8581/22979                  | <b>Adj HR: 1.12</b><br><b>(1.05-1.20)</b><br><br><b>Adj HR: 1.14</b><br><b>(1.07-1.22)</b> | <b>342 more per</b><br><b>10,000</b><br>(from 145 more<br>to 559 more)     | ⊕⊕○○<br>Low                    |

| Study (country)<br>[Risk of bias<br>assessment]      | Neurodevelopmental/psychological<br>outcomes<br>(with definitions when available)                                                                                                                                                                                        | Unspecified<br>number of<br>courses of<br>ACS (n/N) | Unexposed<br>group<br>(n/N) | Reported<br>relative effect<br>(95% CI)                        | Absolute<br>effect (95%<br>CI)                           | GRADE<br>certainty            |
|------------------------------------------------------|--------------------------------------------------------------------------------------------------------------------------------------------------------------------------------------------------------------------------------------------------------------------------|-----------------------------------------------------|-----------------------------|----------------------------------------------------------------|----------------------------------------------------------|-------------------------------|
|                                                      | Visual testing <ul style="list-style-type: none"> <li>any consultations or assessments from an ophthalmologist or optometrist.</li> <li>after removing NICU admitted infants and BW &lt;10th percentile from model</li> </ul>                                            | 1860/2689                                           | 15483/22979                 | Adj HR: 1.06<br>(1.01-1.11)<br><br>Adj HR: 1.06<br>(1.01-1.12) | 212 more per<br>10,000<br>(from 36 more<br>to 378 more)  | ⊕⊕○○<br>Low                   |
|                                                      | Audiometry testing <ul style="list-style-type: none"> <li>physician service claim for hearing deficits (i.e., outside of the routine provincial infant screening program)</li> <li>after removing NICU admitted infants and BW &lt;10th percentile from model</li> </ul> | 627/2689                                            | 4559/22979                  | Adj HR: 1.20<br>(1.10-1.31)<br><br>Adj HR: 1.21<br>(1.11-1.32) | 347 more per<br>10,000<br>(from 175 more<br>to 531 more) | ⊕⊕○○<br>Low                   |
| Raikkonen,<br>2020 (Finland) <sup>12</sup><br>★★★★★½ | Psychological development disorders                                                                                                                                                                                                                                      | 687/8138                                            | 1095/20472                  | Adj HR: 0.96<br>(0.86-1.08)                                    | 21 fewer per<br>10,000<br>(from 73 fewer<br>to 42 more)  | ⊕⊕○○<br>Low                   |
|                                                      | Autism spectrum disorders                                                                                                                                                                                                                                                | 68/8138                                             | 123/20472                   | Adj HR: 1.12<br>(0.78-1.61)                                    | 7 more per<br>10,000<br>(from 13 fewer<br>to 36 more)    | ⊕○○○<br>Very low <sup>a</sup> |
|                                                      | Attention-deficit/hyperactivity or conduct disorders                                                                                                                                                                                                                     | 132/8138                                            | 325/20472                   | Adj HR: 0.82<br>(0.64-1.05)                                    | 28 fewer per<br>10,000<br>(from 57 fewer<br>to 8 more)   | ⊕○○○<br>Very low <sup>a</sup> |
|                                                      | Mixed disorders of conduct and emotions;<br>emotional, social functioning, or tic disorders                                                                                                                                                                              | 94/8138                                             | 273/20472                   | Adj HR: 0.84<br>(0.63-1.11)                                    | 21 fewer per<br>10,000<br>(from 49 fewer<br>to 15 more)  | ⊕○○○<br>Very low <sup>a</sup> |
|                                                      | Other behavioral and emotional disorders                                                                                                                                                                                                                                 | 230/8138                                            | 466/20472                   | Adj HR: 0.83<br>(0.69-1.00)                                    | 38 fewer per<br>10,000<br>(from 70 fewer<br>to 0 fewer)  | ⊕○○○<br>Very low <sup>a</sup> |

| Study (country)<br>[Risk of bias<br>assessment]    | Neurodevelopmental/psychological<br>outcomes<br>(with definitions when available)                                                                                                                                               | Unspecified<br>number of<br>courses of<br>ACS (n/N) | Unexposed<br>group<br>(n/N) | Reported<br>relative effect<br>(95% CI) | Absolute<br>effect (95%<br>CI)                                   | GRADE<br>certainty                 |
|----------------------------------------------------|---------------------------------------------------------------------------------------------------------------------------------------------------------------------------------------------------------------------------------|-----------------------------------------------------|-----------------------------|-----------------------------------------|------------------------------------------------------------------|------------------------------------|
|                                                    | Psychotic, mood, neurotic, stress-related, or somatization disorders                                                                                                                                                            | 47/8138                                             | 98/20472                    | Adj HR: 1.01<br>(0.66-1.54)             | 0 fewer per<br>10,000<br>(from 16 fewer<br>to 26 more)           | ⊕○○○<br>Very low <sup>a</sup>      |
|                                                    | Eating disorders                                                                                                                                                                                                                | 5/8138                                              | 19/20472                    | Adj HR: 0.35<br>(0.11-1.10)             | 6 fewer per<br>10,000<br>(from 8 fewer<br>to 1 more)             | ⊕○○○<br>Very low <sup>a</sup>      |
|                                                    | Sleep disorders                                                                                                                                                                                                                 | 38/8138                                             | 82/20472                    | <b>Adj HR: 1.64<br/>(1.05-2.57)</b>     | <b>26 more per<br/>10,000</b><br>(from 2 more to<br>63 more)     | ⊕⊕○○<br>Low                        |
|                                                    | Mild, moderate, unspecified intellectual disability                                                                                                                                                                             | 76/8138                                             | 166/20472                   | <b>Adj HR: 0.60<br/>(0.44-0.83)</b>     | <b>32 fewer per<br/>10,000</b><br>(from 45 fewer<br>to 14 fewer) | ⊕⊕○○<br>Low                        |
|                                                    | Severe, profound intellectual disability                                                                                                                                                                                        | 15/8138                                             | 22/20472                    | Adj HR: 1.17<br>(0.37-3.69)             | 2 more per<br>10,000<br>(from 7 fewer<br>to 29 more)             | ⊕○○○<br>Very low <sup>a</sup>      |
| Gentle, 2020<br>(U.S.) <sup>16</sup><br>★★★★★★     | Severe neurodevelopmental impairment <ul style="list-style-type: none"> <li>severe cerebral palsy (GMFCS levels 4-5), BSID-III motor or cognitive composite score &lt;70, bilateral blindness, or hearing impairment</li> </ul> | 76/358                                              | 28/158                      | Adj OR: 0.98<br>(0.62-1.55)             | 32 fewer per<br>10,000<br>(from 633<br>fewer to 837<br>more)     | Meta-<br>analyzed<br>(Table 2)     |
|                                                    | Hearing impairment <ul style="list-style-type: none"> <li>whether infant has any hearing impairment event with amplification</li> </ul>                                                                                         | 8/364                                               | 6/158                       | Adj OR: 0.84<br>(0.34-2.08)             | 60 fewer per<br>10,000<br>(from 249<br>fewer to 394<br>more)     | Meta-<br>analyzed<br>(eTable<br>6) |
| Hutcheon, 2020<br>(Canada) <sup>17</sup><br>★★★★★★ | Having special needs based on British Columbia Ministry of Education designation                                                                                                                                                |                                                     |                             | Adj RR 0.9 (0.6 to 1.4)                 | N/A                                                              | ⊕○○○<br>Very low <sup>a</sup>      |

| Study (country)<br>[Risk of bias<br>assessment]   | Neurodevelopmental/psychological<br>outcomes<br>(with definitions when available)                                                                                        | Unspecified<br>number of<br>courses of<br>ACS (n/N)                                   | Unexposed<br>group<br>(n/N)                                                           | Reported<br>relative effect<br>(95% CI)                                                                                   | Absolute<br>effect (95%<br>CI)                                                                                                                                   | GRADE<br>certainty            |
|---------------------------------------------------|--------------------------------------------------------------------------------------------------------------------------------------------------------------------------|---------------------------------------------------------------------------------------|---------------------------------------------------------------------------------------|---------------------------------------------------------------------------------------------------------------------------|------------------------------------------------------------------------------------------------------------------------------------------------------------------|-------------------------------|
| Miyazaki, 2015<br>(Japan) <sup>19</sup><br>★★★★★½ | Neurodevelopmental impairment <ul style="list-style-type: none"> <li>Cerebral palsy, visual impairment, severe hearing impairment, or a KSPD quotient &lt; 70</li> </ul> | <ul style="list-style-type: none"> <li>HCA+: 46/194</li> <li>HCA-: 105/381</li> </ul> | <ul style="list-style-type: none"> <li>HCA+: 37/160</li> <li>HCA-: 171/683</li> </ul> | <ul style="list-style-type: none"> <li>HCA+; Adj OR: 0.94 (0.54-1.65)</li> <li>HCA-; Adj OR: 0.92 (0.67-1.26)</li> </ul>  | <ul style="list-style-type: none"> <li>108 fewer per 10,000 (from 915 fewer to 1,005 more)</li> <li>153 fewer per 10,000 (from 675 fewer to 458 more)</li> </ul> | Meta-analyzed (Table 2)       |
|                                                   | Visual impairment <ul style="list-style-type: none"> <li>defined as unilateral or bilateral blindness</li> </ul>                                                         | <ul style="list-style-type: none"> <li>HCA+: 2/246</li> <li>HCA-: 9/584</li> </ul>    | <ul style="list-style-type: none"> <li>HCA+: 3/192</li> <li>HCA-: 12/904</li> </ul>   | <ul style="list-style-type: none"> <li>HCA+; Adj OR: 0.46 (0.04-5.18)</li> <li>HCA-; Adj OR: 0.94 (0.34-2.60)</li> </ul>  | <ul style="list-style-type: none"> <li>84 fewer per 10,000 (from 150 fewer to 604 more)</li> <li>8 fewer per 10,000 (from 87 fewer to 205 more)</li> </ul>       | ⊕○○○<br>Very low <sup>a</sup> |
|                                                   | Severe hearing impairment <ul style="list-style-type: none"> <li>defined as the need for hearing aids</li> </ul>                                                         | <ul style="list-style-type: none"> <li>HCA+: 3/247</li> <li>HCA-: 4/580</li> </ul>    | <ul style="list-style-type: none"> <li>HCA+: 2/195</li> <li>HCA-: 11/914</li> </ul>   | <ul style="list-style-type: none"> <li>HCA+; Adj OR: 4.00 (0.30-53.39)</li> <li>HCA-; Adj OR: 0.47 (0.15-1.53)</li> </ul> | <ul style="list-style-type: none"> <li>295 more per 10,000 (from 72 fewer to 3,459 more)</li> <li>63 fewer per 10,000 (from 102 fewer to 63 more)</li> </ul>     | Meta-analyzed (eTable 6)      |

| Study (country)<br>[Risk of bias<br>assessment] | Neurodevelopmental/psychological<br>outcomes<br>(with definitions when available)                                                                                                                                                                                                                                                                                                                 | Unspecified<br>number of<br>courses of<br>ACS (n/N)                         | Unexposed<br>group<br>(n/N)                                                  | Reported<br>relative effect<br>(95% CI)                                                               | Absolute<br>effect (95%<br>CI)                                                                                        | GRADE<br>certainty            |
|-------------------------------------------------|---------------------------------------------------------------------------------------------------------------------------------------------------------------------------------------------------------------------------------------------------------------------------------------------------------------------------------------------------------------------------------------------------|-----------------------------------------------------------------------------|------------------------------------------------------------------------------|-------------------------------------------------------------------------------------------------------|-----------------------------------------------------------------------------------------------------------------------|-------------------------------|
|                                                 | Cerebral palsy                                                                                                                                                                                                                                                                                                                                                                                    | <ul style="list-style-type: none"> <li>• <i>HCA+</i>:<br/>21/249</li> </ul> | <ul style="list-style-type: none"> <li>• <i>HCA+</i>:<br/>15/194</li> </ul>  | <ul style="list-style-type: none"> <li>• <i>HCA+</i>;<br/>Adj OR:<br/>0.90<br/>(0.41-1.99)</li> </ul> | <ul style="list-style-type: none"> <li>• 72 fewer per<br/>10,000<br/>(from 441<br/>fewer to 656<br/>more)</li> </ul>  | ⊕○○○<br>Very low <sup>a</sup> |
|                                                 |                                                                                                                                                                                                                                                                                                                                                                                                   | <ul style="list-style-type: none"> <li>• <i>HCA-</i>:<br/>50/575</li> </ul> | <ul style="list-style-type: none"> <li>• <i>HCA-</i>:<br/>72/906</li> </ul>  | <ul style="list-style-type: none"> <li>• <i>HCA-</i>;<br/>Adj OR:<br/>1.07<br/>(0.72-1.59)</li> </ul> | <ul style="list-style-type: none"> <li>• 51 more per<br/>10,000<br/>(from 209<br/>fewer to 412<br/>more)</li> </ul>   | ⊕○○○<br>Very low <sup>a</sup> |
|                                                 | KSPD quotient <70                                                                                                                                                                                                                                                                                                                                                                                 | <ul style="list-style-type: none"> <li>• <i>HCA+</i>:<br/>27/189</li> </ul> | <ul style="list-style-type: none"> <li>• <i>HCA+</i>:<br/>25/161</li> </ul>  | <ul style="list-style-type: none"> <li>• <i>HCA+</i>;<br/>Adj OR:<br/>0.93<br/>(0.48-1.81)</li> </ul> | <ul style="list-style-type: none"> <li>• 93 fewer per<br/>10,000<br/>(from 742<br/>fewer to 944<br/>more)</li> </ul>  | ⊕○○○<br>Very low <sup>a</sup> |
|                                                 |                                                                                                                                                                                                                                                                                                                                                                                                   | <ul style="list-style-type: none"> <li>• <i>HCA-</i>:<br/>62/398</li> </ul> | <ul style="list-style-type: none"> <li>• <i>HCA-</i>:<br/>116/698</li> </ul> | <ul style="list-style-type: none"> <li>• <i>HCA-</i>;<br/>Adj OR:<br/>0.74<br/>(0.51-1.08)</li> </ul> | <ul style="list-style-type: none"> <li>• 377 fewer<br/>per 10,000<br/>(from 739<br/>fewer to 109<br/>more)</li> </ul> | ⊕○○○<br>Very low <sup>a</sup> |
| Basset, 2018<br>(France) <sup>22</sup><br>★★★★★ | Optimal neurodevelopmental outcome at 2<br>years for ZS HC -3 to -1 <ul style="list-style-type: none"> <li>• an optimal outcome was considered<br/>as: absence of cerebral palsy (or when<br/>the clinical examination revealed<br/>neurological signs of abnormal<br/>muscular tone when walking), Brunet-<br/>Lézine test &gt;85, or Ages and Stages<br/>questionnaire score &gt;185</li> </ul> | 425/589                                                                     | 258/346                                                                      | Adj OR: 1.46<br>(0.98-2.20)                                                                           | 650 more per<br>10,000<br>(from 39 fewer<br>to 1,201 more)                                                            | ⊕○○○<br>Very low <sup>a</sup> |



| Study (country)<br>[Risk of bias<br>assessment]  | Neurodevelopmental/psychological<br>outcomes<br>(with definitions when available)                                                                                                                                                                | Unspecified<br>number of<br>courses of<br>ACS (n/N) | Unexposed<br>group<br>(n/N) | Reported<br>relative effect<br>(95% CI)            | Absolute<br>effect (95%<br>CI)                       | GRADE<br>certainty              |
|--------------------------------------------------|--------------------------------------------------------------------------------------------------------------------------------------------------------------------------------------------------------------------------------------------------|-----------------------------------------------------|-----------------------------|----------------------------------------------------|------------------------------------------------------|---------------------------------|
|                                                  | Optimal neurodevelopmental outcome at 2 years for ZS HC -1 to +1 <ul style="list-style-type: none"> <li>using the same definition for ZS HC -3 to -1</li> </ul>                                                                                  | 1566/2042                                           | 1082/1393                   | Adj OR: 1.10<br>(0.92-1.31)                        | 161 more per 10,000<br>(from 148 fewer to 433 more)  | ⊕○○○<br>Very low <sup>a</sup>   |
|                                                  | Optimal neurodevelopmental outcome at 2 years for ZS HC +1 to +3 <ul style="list-style-type: none"> <li>using the same definition for ZS HC -3 to -1</li> </ul>                                                                                  | 264/344                                             | 182/251                     | Adj OR: 1.46<br>(0.98-2.20)                        | 688 more per 10,000<br>(from 40 fewer to 1,279 more) | ⊕○○○<br>Very low <sup>a</sup>   |
| Young, 2016<br>(Canada) <sup>26</sup><br>★★★★½   | Cognitive measures on BSID-III at 2 years <ul style="list-style-type: none"> <li>partial least squares bootstrap ratios for antenatal corticosteroid use</li> </ul>                                                                              |                                                     |                             | <b>Adjusted bootstrap ratio: -3.883; p&lt;0.05</b> | N/A                                                  | ⊕○○○<br>Very low <sup>a</sup>   |
|                                                  | Cognitive measures at 4 years <ul style="list-style-type: none"> <li>three different indices of cognitive ability verbal IQ, performance IQ, and full-scale IQ</li> </ul>                                                                        |                                                     |                             | <b>Adjusted Bootstrap ratio: 3.716; p&lt;0.05</b>  | N/A                                                  | ⊕○○○<br>Very low <sup>a</sup>   |
|                                                  | Behavioural measures at 4 years <ul style="list-style-type: none"> <li>as measured by t-scores on the Behavioral Rating Inventory of Executive Functioning–Preschool and Behavior Assessment System for Children Parent Rating Scales</li> </ul> |                                                     |                             | <b>Adjusted Bootstrap ratio: -2.606; p&lt;0.05</b> | N/A                                                  | ⊕○○○<br>Very low <sup>a</sup>   |
| Ishikawa, 2015<br>(Japan) <sup>23</sup><br>★★★★½ | Neurodevelopmental impairment <ul style="list-style-type: none"> <li>cerebral palsy, development quotient &lt;70, or severe hearing impairment or visual impairment</li> </ul>                                                                   | 66/285                                              | 93/505                      | Adj OR: 1.03<br>(0.62-1.70)                        | 45 more per 10,000<br>(from 614 fewer to 932 more)   | ⊕○○○<br>Very low <sup>a,b</sup> |
|                                                  | Visual impairment <ul style="list-style-type: none"> <li>unilateral or bilateral blindness</li> </ul>                                                                                                                                            | 1/275                                               | 3/490                       | Adj OR: 1.03<br>(0.02-36.15)                       | 2 more per 10,000<br>(from 60 fewer to 1,760 more)   | ⊕○○○<br>Very low <sup>a,b</sup> |

| Study (country)<br>[Risk of bias<br>assessment] | Neurodevelopmental/psychological<br>outcomes<br>(with definitions when available)                                                                                                           | Unspecified<br>number of<br>courses of<br>ACS (n/N) | Unexposed<br>group<br>(n/N) | Reported<br>relative effect<br>(95% CI) | Absolute<br>effect (95%<br>CI)                                 | GRADE<br>certainty                 |
|-------------------------------------------------|---------------------------------------------------------------------------------------------------------------------------------------------------------------------------------------------|-----------------------------------------------------|-----------------------------|-----------------------------------------|----------------------------------------------------------------|------------------------------------|
|                                                 | Cerebral palsy <ul style="list-style-type: none"> <li>characterized by abnormal muscle tone in at least one extremity and abnormal control of movement and posture</li> </ul>               | 19/278                                              | 25/498                      | Adj OR: 1.12<br>(0.41-2.96)             | 57 more per<br>10,000<br>(from 290<br>fewer to 851<br>more)    | ⊕○○○<br>Very<br>low <sup>a,b</sup> |
|                                                 | KSPD quotient <70                                                                                                                                                                           | 51/271                                              | 70/486                      | Adj OR: 1.08<br>(0.63-1.85)             | 98 more per<br>10,000<br>(from 482<br>fewer to 934<br>more)    | ⊕○○○<br>Very<br>low <sup>a,b</sup> |
| Kallen, 2015<br>(Sweden) <sup>27</sup><br>★★★★½ | Any moderate or severe disability <ul style="list-style-type: none"> <li>visual or hearing impairment, cerebral palsy, low BSID-III composite cognitive, language or motor score</li> </ul> | 114/411                                             | 10/45                       | Adj OR: 1.20<br>(0.50-2.90)             | 331 more per<br>10,000<br>(from 972<br>fewer to 2,309<br>more) | Meta-<br>analyzed<br>(Table 2)     |
|                                                 | Neurosensory impairment <ul style="list-style-type: none"> <li>moderate or severe impairment regarding vision and hearing</li> </ul>                                                        | 31/411                                              | 3/45                        | Adj OR: 1.10<br>(0.30-4.80)             | 62 more per<br>10,000<br>(from 457<br>fewer to 1,887<br>more)  | ⊕○○○<br>Very<br>low <sup>a,b</sup> |
|                                                 | Mental developmental delay <ul style="list-style-type: none"> <li>cognitive or language BSID-III scale &lt; mean -2 SD</li> </ul>                                                           | 82/411                                              | 6/45                        | Adj OR: 0.70<br>(0.30-1.90)             | 361 fewer per<br>10,000<br>(from 892<br>fewer to 929<br>more)  | ⊕○○○<br>Very<br>low <sup>a,b</sup> |

| Study (country)<br>[Risk of bias<br>assessment]                   | Neurodevelopmental/psychological<br>outcomes<br>(with definitions when available)                                                                                                                   | Unspecified<br>number of<br>courses of<br>ACS (n/N)                                                    | Unexposed<br>group<br>(n/N)                                                                        | Reported<br>relative effect<br>(95% CI)                                                                                                                                     | Absolute<br>effect (95%<br>CI)                                                                                                                                                        | GRADE<br>certainty      |
|-------------------------------------------------------------------|-----------------------------------------------------------------------------------------------------------------------------------------------------------------------------------------------------|--------------------------------------------------------------------------------------------------------|----------------------------------------------------------------------------------------------------|-----------------------------------------------------------------------------------------------------------------------------------------------------------------------------|---------------------------------------------------------------------------------------------------------------------------------------------------------------------------------------|-------------------------|
| Kiechl-<br>kohlendorfer,<br>2009 (Austria) <sup>28</sup><br>★★★★½ | Neurodevelopmental delay <ul style="list-style-type: none"> <li>defined as &lt;85 on either the BSID-II PDI or the MDI, cerebral palsy, blindness, or hearing loss requiring hearing aid</li> </ul> | <ul style="list-style-type: none"> <li>GA &lt;30w:<br/>28/81</li> <li>GA 30-32w:<br/>20/101</li> </ul> | <ul style="list-style-type: none"> <li>GA &lt;30w:<br/>9/15</li> <li>GA 30-32w:<br/>5/8</li> </ul> | <ul style="list-style-type: none"> <li>GA &lt;30w,<br/><b>Adj OR:<br/>0.256<br/>(0.07-0.96)</b></li> <li>GA 30-32w,<br/><b>Adj OR:<br/>0.170<br/>(0.04-0.81)</b></li> </ul> | <ul style="list-style-type: none"> <li><b>3,225 fewer per 10,000</b> (from 5,050 fewer to 98 fewer)</li> <li><b>4,042 fewer per 10,000</b> (from 5,625 fewer to 505 fewer)</li> </ul> | Meta-analyzed (Table 2) |
| <i>Children born at term</i>                                      |                                                                                                                                                                                                     |                                                                                                        |                                                                                                    |                                                                                                                                                                             |                                                                                                                                                                                       |                         |
| Melamed, 2019 (Canada) <sup>30</sup><br>★★★★★★★                   | Composite long-term outcome of any of the following: <ul style="list-style-type: none"> <li>audiometry testing</li> <li>visual testing</li> <li>suspected neurocognitive disorder</li> </ul>        | 3346/5423                                                                                              | 302520/523782                                                                                      | <b>Adj HR: 1.12 (1.08-1.16)</b>                                                                                                                                             | <b>415 more per 10,000</b> (from 281 more to 544 more)                                                                                                                                | ⊕⊕○○<br>Low             |
|                                                                   | Visual testing <ul style="list-style-type: none"> <li>any consultations or assessments from an ophthalmologist or optometrist</li> </ul>                                                            | 2461/5423                                                                                              | 227948/523782                                                                                      | <b>Adj HR: 1.08 (1.04-1.12)</b>                                                                                                                                             | <b>252 more per 10,000</b> (from 128 more to 374 more)                                                                                                                                | ⊕⊕○○<br>Low             |
|                                                                   | Audiometry testing <ul style="list-style-type: none"> <li>physician service claim for this testing outside the routine provincial infant screening programme for hearing deficits</li> </ul>        | 827/5423                                                                                               | 66555/523782                                                                                       | <b>Adj HR: 1.18 (1.11-1.25)</b>                                                                                                                                             | <b>211 more per 10,000</b> (from 130 more to 292 more)                                                                                                                                | ⊕⊕○○<br>Low             |
|                                                                   | Suspected neurocognitive disorder <ul style="list-style-type: none"> <li>any physician service claim with a diagnosis code related to a suspected neurocognitive disorder</li> </ul>                | 1397/5423                                                                                              | 113181/523782                                                                                      | <b>Adj HR: 1.16 (1.10-1.21)</b>                                                                                                                                             | <b>299 more per 10,000</b> (from 189 more to 391 more)                                                                                                                                | ⊕⊕○○<br>Low             |

| Study (country)<br>[Risk of bias<br>assessment]      | Neurodevelopmental/psychological<br>outcomes<br>(with definitions when available)           | Unspecified<br>number of<br>courses of<br>ACS (n/N) | Unexposed<br>group<br>(n/N) | Reported<br>relative effect<br>(95% CI) | Absolute<br>effect (95%<br>CI)                                  | GRADE<br>certainty            |
|------------------------------------------------------|---------------------------------------------------------------------------------------------|-----------------------------------------------------|-----------------------------|-----------------------------------------|-----------------------------------------------------------------|-------------------------------|
| Raikkonen,<br>2020 (Finland) <sup>12</sup><br>★★★★★½ | Psychological development disorders                                                         | 269/6730                                            | 17994/634757                | <b>Adj HR: 1.45<br/>(1.28-1.64)</b>     | <b>125 more per<br/>10,000</b><br>(from 78 more<br>to 177 more) | ⊕⊕○○<br>Low                   |
|                                                      | Autism spectrum disorders                                                                   | 28/6730                                             | 2684/634757                 | Adj HR: 1.06<br>(0.73-1.54)             | 3 more per<br>10,000<br>(from 11 fewer<br>to 23 more)           | ⊕○○○<br>Very low <sup>a</sup> |
|                                                      | Attention-deficit/hyperactivity or conduct<br>disorders                                     | 84/6730                                             | 6448/634757                 | <b>Adj HR: 1.33<br/>(1.06-1.65)</b>     | <b>33 more per<br/>10,000</b><br>(from 6 more to<br>65 more)    | ⊕⊕○○<br>Low                   |
|                                                      | Mixed disorders of conduct and emotions;<br>emotional, social functioning, or tic disorders | 87/6730                                             | 6077/634757                 | <b>Adj HR: 1.47<br/>(1.36-1.60)</b>     | <b>45 more per<br/>10,000</b><br>(from 34 more<br>to 57 more)   | ⊕⊕○○<br>Low                   |
|                                                      | Other behavioral and emotional disorders                                                    | 115/6730                                            | 7583/634757                 | <b>Adj HR: 1.42<br/>(1.14-1.76)</b>     | <b>50 more per<br/>10,000</b><br>(from 17 more<br>to 90 more)   | ⊕⊕○○<br>Low                   |
|                                                      | Psychotic, mood, neurotic, stress-related, or<br>somatization disorders                     | 24/6730                                             | 2143/634757                 | Adj HR: 1.20<br>(0.80-1.80)             | 7 more per<br>10,000<br>(from 7 fewer<br>to 27 more)            | ⊕○○○<br>Very low <sup>a</sup> |
|                                                      | Eating disorders                                                                            | 4/6730                                              | 224/634757                  | Adj HR: 1.61<br>(0.60-4.35)             | 2 more per<br>10,000<br>(from 1 fewer<br>to 12 more)            | ⊕○○○<br>Very low <sup>a</sup> |
|                                                      | Sleep disorders                                                                             | 41/6730                                             | 2082/634757                 | <b>Adj HR: 1.79<br/>(1.31-2.44)</b>     | <b>26 more per<br/>10,000</b><br>(from 10 more<br>to 47 more)   | ⊕⊕○○<br>Low                   |

| Study (country)<br>[Risk of bias<br>assessment] | Neurodevelopmental/psychological<br>outcomes<br>(with definitions when available) | Unspecified<br>number of<br>courses of<br>ACS (n/N) | Unexposed<br>group<br>(n/N) | Reported<br>relative effect<br>(95% CI) | Absolute<br>effect (95%<br>CI)                         | GRADE<br>certainty            |
|-------------------------------------------------|-----------------------------------------------------------------------------------|-----------------------------------------------------|-----------------------------|-----------------------------------------|--------------------------------------------------------|-------------------------------|
|                                                 | Mild, moderate, unspecified intellectual disability                               | 25/6730                                             | 2093/634757                 | Adj HR: 0.96<br>(0.64-1.42)             | 1 fewer per<br>10,000<br>(from 12 fewer<br>to 14 more) | ⊕○○○<br>Very low <sup>a</sup> |
|                                                 | Severe, profound intellectual disability                                          | 3/6730                                              | 197/634757                  | Adj HR: 1.37<br>(0.62-3.02)             | 1 more per<br>10,000<br>(from 1 fewer<br>to 6 more)    | ⊕○○○<br>Very low <sup>a</sup> |

**Legend:**

ACS – antenatal corticosteroids; CI – confidence interval; SD – standard deviation; diff – difference; adj – adjusted; HR – hazard ratio; OR – odds ratio; KSPD – Kyoto Scale of Psychological Development; BSID – Bayley Scales of Infant and Toddler Development; GMFCS – Gross Motor Function Classification System; ZS – z-score; HC – head circumference; NS – not stated/defined; IQ – intelligence quotient; HCA – histological chorioamnionitis; MDI – mental development index; PDI – psychomotor development index; GA – gestational age

Newcastle-Ottawa Scale: ★ – point awarded; ½ – half point awarded

GRADE Assessment: Low rating indicates no serious concerns in GRADE domains and no other considerations were made; a–serious rating for imprecision due to small sample size/wide 95% CI's; b–serious rating for risk of bias due to low Newcastle-Ottawa scale rating (i.e., <6 stars). For pooled outcomes refer to eTable 6.

**Green font**– a statistically sign

Significant beneficial outcome, **grey highlighting** – not measured/reported, **red font**– a statistically significant harmful outcome

**eTable 5.** Individual Unadjusted Neurodevelopmental/Psychological Outcomes of Included Studies on an Unspecified Number of Courses of Antenatal Corticosteroids vs. Non-Exposure in a Systematic Review and Meta-analysis of Long-Term Outcomes Associated with Preterm Exposure to Antenatal Corticosteroids

| Study (country) [Risk of bias assessment]         | Neurodevelopmental/psychological outcomes (with definitions when available)                                                                                                                                                                                                                                                                                                                                                                                                                                                            | Unspecified number of courses of ACS (n/N) | Unexposed group (n/N) | Reported effect measure & size (95% CI)                                                                                                                                                                                                                                           | GRADE certainty |
|---------------------------------------------------|----------------------------------------------------------------------------------------------------------------------------------------------------------------------------------------------------------------------------------------------------------------------------------------------------------------------------------------------------------------------------------------------------------------------------------------------------------------------------------------------------------------------------------------|--------------------------------------------|-----------------------|-----------------------------------------------------------------------------------------------------------------------------------------------------------------------------------------------------------------------------------------------------------------------------------|-----------------|
| <i>Children born preterm or at term</i>           |                                                                                                                                                                                                                                                                                                                                                                                                                                                                                                                                        |                                            |                       |                                                                                                                                                                                                                                                                                   |                 |
| Raikkonen, 2020 (Finland) <sup>12</sup><br>★★★★★½ | Any mental and behavioral disorder in all children born preterm/term <ul style="list-style-type: none"> <li>• <i>all consecutive sibling pairs discordant for treatment-exposure vs concordant for non-exposure</i></li> <li>• <i>younger treatment-exposed and older non-exposed vs both younger and older non-exposed</i></li> <li>• <i>all consecutive sibling pairs with first sibling pair discordant for treatment-exposure for each mother versus first sibling pair concordant for non-exposure for each mother</i></li> </ul> | 1785/14868                                 | 42243/655229          | <b>Unadjusted absolute diff: 5.56 (5.04-6.19)</b> <ul style="list-style-type: none"> <li>• <b>Unadjusted absolute diff: 2.40 (1.67-3.21)</b></li> <li>• <b>Unadjusted absolute diff: 1.58 (0.66-2.66)</b></li> <li>• <b>Unadjusted absolute diff: 2.35 (1.51-3.30)</b></li> </ul> | ⊕⊕○○<br>Low     |
|                                                   | Psychological development disorders                                                                                                                                                                                                                                                                                                                                                                                                                                                                                                    | 956/14868                                  | 19089/655229          | <b>Unadjusted absolute diff: 3.52 (3.12-3.93)</b>                                                                                                                                                                                                                                 | ⊕⊕○○<br>Low     |
|                                                   | Autism spectrum disorders                                                                                                                                                                                                                                                                                                                                                                                                                                                                                                              | 96/14868                                   | 2807/655229           | <b>Unadjusted absolute diff: 1.22 (0.10-0.36)</b>                                                                                                                                                                                                                                 | ⊕⊕○○<br>Low     |

| Study (country) [Risk of bias assessment]         | Neurodevelopmental/psychological outcomes (with definitions when available)              | Unspecified number of courses of ACS (n/N) | Unexposed group (n/N) | Reported effect measure & size (95% CI)           | GRADE certainty               |
|---------------------------------------------------|------------------------------------------------------------------------------------------|--------------------------------------------|-----------------------|---------------------------------------------------|-------------------------------|
|                                                   | Attention-deficit/hyperactivity or conduct disorders                                     | 216/14868                                  | 6773/655229           | <b>Unadjusted absolute diff: 0.42 (0.24-0.64)</b> | ⊕⊕○○<br>Low                   |
|                                                   | Mixed disorders of conduct and emotions; emotional, social functioning, or tic disorders | 181/14868                                  | 6350/655229           | <b>Unadjusted absolute diff: 0.25 (0.08-0.44)</b> | ⊕⊕○○<br>Low                   |
|                                                   | Other behavioral and emotional disorders                                                 | 345/14868                                  | 8049/655229           | <b>Unadjusted absolute diff: 1.09 (0.86-1.35)</b> | ⊕⊕○○<br>Low                   |
|                                                   | Psychotic, mood, neurotic, stress-related, or somatization disorders                     | 71/14868                                   | 2241/655229           | <b>Unadjusted absolute diff: 0.14 (0.04-1.26)</b> | ⊕⊕○○<br>Low                   |
|                                                   | Eating disorders                                                                         | 6/14868                                    | 243/655229            | Unadjusted absolute diff: 0.02 (-0.01-0.08)       | ⊕○○○<br>Very low <sup>a</sup> |
|                                                   | Sleep disorders                                                                          | 79/14868                                   | 2110/655229           | <b>Unadjusted absolute diff: 0.21 (0.10-0.34)</b> | ⊕⊕○○<br>Low                   |
|                                                   | Mild, moderate, unspecified intellectual disability                                      | 101/14868                                  | 2259/655229           | <b>Unadjusted absolute diff: 0.33 (0.21-0.48)</b> | ⊕⊕○○<br>Low                   |
|                                                   | Severe, profound intellectual disability                                                 | 18/14868                                   | 219/655229            | <b>Unadjusted absolute diff: 0.09 (0.04-0.16)</b> | ⊕⊕○○<br>Low                   |
| <i>Children born preterm</i>                      |                                                                                          |                                            |                       |                                                   |                               |
| Raikkonen, 2020 (Finland) <sup>12</sup><br>★★★★★½ | Any mental and behavioral disorder                                                       | 1187/8138                                  | 2192/20472            | <b>Unadjusted absolute diff: 3.88 (2.95-4.87)</b> | ⊕⊕○○<br>Low                   |
|                                                   | Psychological development disorders                                                      | 687/8138                                   | 1095/20472            | <b>Unadjusted absolute diff: 3.09 (2.35-3.91)</b> | ⊕⊕○○<br>Low                   |

| Study (country) [Risk of bias assessment] | Neurodevelopmental/psychological outcomes (with definitions when available)              | Unspecified number of courses of ACS (n/N) | Unexposed group (n/N) | Reported effect measure & size (95% CI)           | GRADE certainty               |
|-------------------------------------------|------------------------------------------------------------------------------------------|--------------------------------------------|-----------------------|---------------------------------------------------|-------------------------------|
|                                           | Autism spectrum disorders                                                                | 68/8138                                    | 123/20472             | <b>Unadjusted absolute diff: 0.23 (0.02-0.52)</b> | ⊕○○○<br>Very low <sup>a</sup> |
|                                           | Attention-deficit/hyperactivity or conduct disorders                                     | 132/8138                                   | 325/20472             | Unadjusted absolute diff: 0.03 (−0.26-0.02)       | ⊕○○○<br>Very low <sup>a</sup> |
|                                           | Mixed disorders of conduct and emotions; emotional, social functioning, or tic disorders | 94/8138                                    | 273/20472             | Unadjusted absolute diff: −0.18 (−0.42-0.12)      | ⊕○○○<br>Very low <sup>a</sup> |
|                                           | Other behavioral and emotional disorders                                                 | 230/8138                                   | 466/20472             | Unadjusted absolute diff: −0.18 (−0.42-0.12)      | ⊕○○○<br>Very low <sup>a</sup> |
|                                           | Psychotic, mood, neurotic, stress-related, or somatization disorders                     | 47/8138                                    | 98/20472              | Unadjusted absolute diff: 0.10 (−0.07-0.34)       | ⊕○○○<br>Very low <sup>a</sup> |
|                                           | Eating disorders                                                                         | 5/8138                                     | 19/20472              | Unadjusted absolute diff: −0.03 (−0.07 - 0.07)    | ⊕○○○<br>Very low <sup>a</sup> |
|                                           | Sleep disorders                                                                          | 38/8138                                    | 82/20472              | Unadjusted absolute diff: 0.07 (−0.08 - 0.28)     | ⊕⊕○○<br>Low                   |
|                                           | Mild, moderate, unspecified intellectual disability                                      | 76/8138                                    | 166/20472             | Unadjusted absolute diff: 0.12 (−1.10 - 0.41)     | ⊕⊕○○<br>Low                   |
|                                           | Severe, profound intellectual disability                                                 | 15/8138                                    | 22/20472              | Unadjusted absolute diff: 0.01 (−0.02 - 0.11)     | ⊕○○○<br>Very low <sup>a</sup> |



| Study (country) [Risk of bias assessment]     | Neurodevelopmental/psychological outcomes (with definitions when available)                                                                                                                                                     | Unspecified number of courses of ACS (n/N) | Unexposed group (n/N)        | Reported effect measure & size (95% CI) | GRADE certainty               |
|-----------------------------------------------|---------------------------------------------------------------------------------------------------------------------------------------------------------------------------------------------------------------------------------|--------------------------------------------|------------------------------|-----------------------------------------|-------------------------------|
| Gentle, 2020 (U.S.) <sup>16</sup><br>★★★★★★   | Severe neurodevelopmental impairment <ul style="list-style-type: none"> <li>severe cerebral palsy (GMFCS levels 4-5), BSID-III motor or cognitive composite score &lt;70, bilateral blindness, or hearing impairment</li> </ul> | 76/358                                     | 28/158                       | Unadjusted OR: 1.01 (0.65-1.55)         | Meta-analyzed (eTable 6)      |
|                                               | Bilateral blindness <ul style="list-style-type: none"> <li>with no useful vision in either eye</li> </ul>                                                                                                                       | 1/333                                      | 0/252                        |                                         | ⊕○○○<br>Very low <sup>a</sup> |
|                                               | Hearing impairment <ul style="list-style-type: none"> <li>whether infant has any hearing impairment event with amplification</li> </ul>                                                                                         | 8/364                                      | 6/158                        | Unadjusted OR: 0.84 (0.35-2.02)         | ⊕○○○<br>Very low <sup>a</sup> |
|                                               | Moderate to severe cerebral palsy                                                                                                                                                                                               | 35/361                                     | 13/159                       |                                         | Meta-analyzed (eTable 6)      |
|                                               | BSID-III motor composite score <70                                                                                                                                                                                              | 59/355                                     | 22/156                       |                                         | ⊕○○○<br>Very low <sup>a</sup> |
|                                               | BSID-III cognitive composite score <70                                                                                                                                                                                          | 43/355                                     | 14/157                       |                                         | ⊕○○○<br>Very low <sup>a</sup> |
| Bulbul, 2020 (Turkey) <sup>18</sup><br>★★★★★½ | BSID-III cognitive score                                                                                                                                                                                                        | Mean (SD): 91.4 (12.3), n=51               | Mean (SD): 94.3 (10.7), n=45 |                                         | ⊕○○○<br>Very low <sup>a</sup> |
|                                               | BSID-III language score                                                                                                                                                                                                         | Mean (SD): 89.5 (11.6), n=51               | Mean (SD): 96.7 (11.5), n=45 |                                         | ⊕○○○<br>Very low <sup>a</sup> |

| Study (country) [Risk of bias assessment]     | Neurodevelopmental/psychological outcomes (with definitions when available) | Unspecified number of courses of ACS (n/N)                             | Unexposed group (n/N)                                                  | Reported effect measure & size (95% CI)                                                                                                                                | GRADE certainty          |
|-----------------------------------------------|-----------------------------------------------------------------------------|------------------------------------------------------------------------|------------------------------------------------------------------------|------------------------------------------------------------------------------------------------------------------------------------------------------------------------|--------------------------|
| Ushida, 2020a (Japan) <sup>20</sup><br>★★★★★½ | Visual impairment                                                           | 303/4906<br>• <i>Singletons</i> : 243/3908<br>• <i>Twins</i> : 60/998  | 243/4497<br>• <i>Singletons</i> : 189/3547<br>• <i>Twins</i> : 54/950  | <ul style="list-style-type: none"> <li>• <i>Singletons</i>; unadjusted OR: 1.18 (0.97-1.43)</li> <li>• <i>Twins</i>; unadjusted OR: 1.06 (0.73-1.55)</li> </ul>        | Meta-analyzed (eTable 6) |
|                                               | Hearing impairment                                                          | 25/4008<br>• <i>Singletons</i> : 21/3192<br>• <i>Twins</i> : 4/816     | 38/3460<br>• <i>Singletons</i> : 31/2737<br>• <i>Twins</i> : 7/723     | <ul style="list-style-type: none"> <li>• <i>Singletons</i>; unadjusted OR: 0.58 (0.23-1.01)</li> <li>• <i>Twins</i>; unadjusted OR: 0.50 (0.15-1.73)</li> </ul>        | Meta-analyzed (eTable 6) |
|                                               | Cerebral palsy                                                              | 405/5076<br>• <i>Singletons</i> : 313/4042<br>• <i>Twins</i> : 92/1034 | 437/4683<br>• <i>Singletons</i> : 332/3693<br>• <i>Twins</i> : 105/990 | <ul style="list-style-type: none"> <li>• <i>Singletons</i>; <b>unadjusted OR: 0.85 (0.72-0.99)</b></li> <li>• <i>Twins</i>; unadjusted OR: 0.82 (0.61-1.11)</li> </ul> | Meta-analyzed (eTable 6) |

| Study (country) [Risk of bias assessment]     | Neurodevelopmental/psychological outcomes (with definitions when available)         | Unspecified number of courses of ACS (n/N)                             | Unexposed group (n/N)                                                 | Reported effect measure & size (95% CI)                                                                   | GRADE certainty               |
|-----------------------------------------------|-------------------------------------------------------------------------------------|------------------------------------------------------------------------|-----------------------------------------------------------------------|-----------------------------------------------------------------------------------------------------------|-------------------------------|
|                                               | KSPD<br>Development quotient <70                                                    | 500/3320<br>• <i>Singletons</i> : 391/2687<br>• <i>Twins</i> : 109/633 | 494/3126<br>• <i>Singletons</i> : 395/2496<br>• <i>Twins</i> : 99/630 | • <i>Singletons</i> ; unadjusted OR: 0.91 (0.78-1.05)<br>• <i>Twins</i> ; unadjusted OR: 1.12 (0.83-1.50) | ⊕○○○<br>Very low <sup>a</sup> |
| Ushida, 2020b (Japan) <sup>21</sup><br>★★★★★½ | Blindness<br>• with no functional vision in at least one eye or bilateral amblyopia | • <i>HDP</i> : 47/942<br>• <i>Non-HDP</i> : 191/3402                   | • <i>HDP</i> : 36/827<br>• <i>Non-HDP</i> : 142/2347                  | • <i>HDP</i> ; unadjusted OR: 1.15 (0.74-1.80)<br>• <i>Non-HDP</i> ; unadjusted OR: 0.92 (0.74-1.16)      | ⊕○○○<br>Very low <sup>a</sup> |
|                                               | Hearing impairment<br>• need for hearing aids                                       | • <i>HDP</i> : 4/713<br>• <i>Non-HDP</i> : 42/2725                     | • <i>HDP</i> : 6/631<br>• <i>Non-HDP</i> : 38/1793                    | • <i>HDP</i> ; unadjusted OR: 0.61 (0.18-2.04)<br>• <i>Non-HDP</i> ; unadjusted OR: 0.72 (0.46-1.13)      | ⊕○○○<br>Very low <sup>a</sup> |

| Study (country) [Risk of bias assessment] | Neurodevelopmental/psychological outcomes (with definitions when available) | Unspecified number of courses of ACS (n/N)                                                     | Unexposed group (n/N)                                                                         | Reported effect measure & size (95% CI)                                                                                                      | GRADE certainty               |
|-------------------------------------------|-----------------------------------------------------------------------------|------------------------------------------------------------------------------------------------|-----------------------------------------------------------------------------------------------|----------------------------------------------------------------------------------------------------------------------------------------------|-------------------------------|
|                                           | Cerebral palsy                                                              | <ul style="list-style-type: none"> <li>• HDP: 58/975</li> <li>• Non-HDP: 271/3510</li> </ul>   | <ul style="list-style-type: none"> <li>• HDP: 46/851</li> <li>• Non-HDP: 259/2458</li> </ul>  | <ul style="list-style-type: none"> <li>• HDP; unadjusted OR: 1.11 (0.74-1.65)</li> <li>• Non-HDP; unadjusted OR: 0.71 (0.59-0.85)</li> </ul> | ⊕○○○<br>Very low <sup>a</sup> |
|                                           | KSPD Quotient <70                                                           | <ul style="list-style-type: none"> <li>• HDP: 117/743</li> <li>• Non-HDP: 416/2612</li> </ul>  | <ul style="list-style-type: none"> <li>• HDP: 93/593</li> <li>• Non-HDP: 274/1643</li> </ul>  | <ul style="list-style-type: none"> <li>• HDP; unadjusted OR: 1.00 (0.75-1.35)</li> <li>• Non-HDP; unadjusted OR: 0.95 (0.80-1.12)</li> </ul> | ⊕○○○<br>Very low <sup>a</sup> |
|                                           | KSPD Quotient <85                                                           | <ul style="list-style-type: none"> <li>• HDP: 364/743</li> <li>• Non-HDP: 1283/2612</li> </ul> | <ul style="list-style-type: none"> <li>• HDP: 268/593</li> <li>• Non-HDP: 874/1643</li> </ul> | <ul style="list-style-type: none"> <li>• HDP; unadjusted OR: 1.16 (0.94-1.45)</li> <li>• Non-HDP; unadjusted OR: 0.85 (0.75-0.96)</li> </ul> | ⊕○○○<br>Very low <sup>a</sup> |

| Study (country) [Risk of bias assessment]    | Neurodevelopmental/psychological outcomes (with definitions when available)                                                                                                                                                                                                                                                                          | Unspecified number of courses of ACS (n/N) | Unexposed group (n/N) | Reported effect measure & size (95% CI) | GRADE certainty                 |
|----------------------------------------------|------------------------------------------------------------------------------------------------------------------------------------------------------------------------------------------------------------------------------------------------------------------------------------------------------------------------------------------------------|--------------------------------------------|-----------------------|-----------------------------------------|---------------------------------|
| Li, 2019 (China) <sup>24</sup><br>★★★★½      | Neurodevelopmental disability <ul style="list-style-type: none"> <li>• moderate-to-severe cerebral palsy (GMFCS level 3-5), Gesell Development Scale development quotient &lt;75 (considered as motor and cognition delay), or language delay (does not achieve the level corresponding to age, assessed with Sign-Significant relations)</li> </ul> | 10/25                                      | 37/106                |                                         | Meta-analyzed (eTable 6)        |
| Ochiai, 2014 (Japan) <sup>25</sup><br>★★★★½  | KSPD<br>Development quotient >50 at 3 years of age                                                                                                                                                                                                                                                                                                   | NS                                         | NS                    | Unadjusted OR: 1.37 (0.35-5.34)         | ⊕○○○<br>Very low <sup>a,b</sup> |
| Kallen, 2015 (Sweden) <sup>27</sup><br>★★★★½ | Any moderate or severe disability <ul style="list-style-type: none"> <li>• visual or hearing impairment, cerebral palsy, low BSID-III composite cognitive, language or motor score</li> </ul>                                                                                                                                                        | 114/411                                    | 10/45                 | Unadjusted OR: 1.10                     | Meta-analyzed (eTable 6)        |
|                                              | Neurosensory impairment <ul style="list-style-type: none"> <li>• moderate or severe impairment regarding vision and hearing</li> </ul>                                                                                                                                                                                                               | 31/411                                     | 3/45                  | Unadjusted OR: 1.00                     | ⊕○○○<br>Very low <sup>a,b</sup> |
|                                              | Mental developmental delay <ul style="list-style-type: none"> <li>• cognitive or language BSID-III scale &lt; mean -2 SD</li> </ul>                                                                                                                                                                                                                  | 82/411                                     | 6/45                  | Unadjusted OR: 0.70                     | ⊕○○○<br>Very low <sup>a,b</sup> |
| Sun, 2015 (China) <sup>29</sup><br>★★★★½     | Cerebral palsy                                                                                                                                                                                                                                                                                                                                       | 13/214                                     | 6/74                  |                                         | Meta-analyzed (eTable 6)        |
|                                              | BSID-II MDI score <70                                                                                                                                                                                                                                                                                                                                | 50/214                                     | 24/74                 | Unadjusted OR: 0.60 (0.30-1.21)         | ⊕○○○<br>Very low <sup>a,b</sup> |

| Study (country) [Risk of bias assessment]         | Neurodevelopmental/psychological outcomes (with definitions when available)              | Unspecified number of courses of ACS (n/N) | Unexposed group (n/N) | Reported effect measure & size (95% CI)           | GRADE certainty               |
|---------------------------------------------------|------------------------------------------------------------------------------------------|--------------------------------------------|-----------------------|---------------------------------------------------|-------------------------------|
| <i>Children born at term</i>                      |                                                                                          |                                            |                       |                                                   |                               |
| Raikkonen, 2020 (Finland) <sup>12</sup><br>★★★★★½ | Any mental or behavioral disorder                                                        | 598/6730                                   | 40051/634757          | <b>Unadjusted absolute diff: 2.58 (1.92-3.29)</b> | ⊕⊕○○<br>Low                   |
|                                                   | Psychological development disorders                                                      | 269/6730                                   | 17994/634757          | <b>Unadjusted absolute diff: 1.16 (0.72-1.66)</b> | ⊕⊕○○<br>Low                   |
|                                                   | Autism spectrum disorders                                                                | 28/6730                                    | 2684/634757           | Unadjusted absolute diff: -0.01 (-0.14 - 0.18)    | ⊕○○○<br>Very low <sup>a</sup> |
|                                                   | Attention-deficit/hyperactivity or conduct disorders                                     | 84/6730                                    | 6448/634757           | Unadjusted absolute diff: 0.23 (-0.01-0.53)       | ⊕⊕○○<br>Low                   |
|                                                   | Mixed disorders of conduct and emotions; emotional, social functioning, or tic disorders | 87/6730                                    | 6077/634757           | <b>Unadjusted absolute diff: 2.58 (1.92-3.29)</b> | ⊕⊕○○<br>Low                   |
|                                                   | Other behavioral and emotional disorders                                                 | 115/6730                                   | 7583/634757           | <b>Unadjusted absolute diff: 0.34 (0.09-0.64)</b> | ⊕⊕○○<br>Low                   |
|                                                   | Psychotic, mood, neurotic, stress-related, or somatization disorders                     | 24/6730                                    | 2143/634757           | Unadjusted absolute diff: 0.02 (-0.10 - 0.20)     | ⊕○○○<br>Very low <sup>a</sup> |
|                                                   | Eating disorders                                                                         | 4/6730                                     | 224/634757            | Unadjusted absolute diff: 0.02 (-0.01 - 0.12)     | ⊕○○○<br>Very low <sup>a</sup> |
|                                                   | Sleep disorders                                                                          | 41/6730                                    | 2082/634757           | <b>Unadjusted absolute diff: 0.29 (0.13-0.51)</b> | ⊕⊕○○<br>Low                   |

| Study (country) [Risk of bias assessment] | Neurodevelopmental/psychological outcomes (with definitions when available) | Unspecified number of courses of ACS (n/N) | Unexposed group (n/N) | Reported effect measure & size (95% CI)       | GRADE certainty               |
|-------------------------------------------|-----------------------------------------------------------------------------|--------------------------------------------|-----------------------|-----------------------------------------------|-------------------------------|
|                                           | Mild, moderate, unspecified intellectual disability                         | 25/6730                                    | 2093/634757           | Unadjusted absolute diff: 0.04 (−0.08 - 0.22) | ⊕○○○<br>Very low <sup>a</sup> |
|                                           | Severe, profound intellectual disability                                    | 3/6730                                     | 197/634757            | Unadjusted Absolute diff: 0.08 (−0.01 - 0.25) | ⊕○○○<br>Very low <sup>a</sup> |

**Legend:**

ACS – antenatal corticosteroids; CI – confidence interval; diff – difference; adj – adjusted; HR – hazard ratio; OR – odds ratio; KSPD – Kyoto Scale of Psychological Development; BSID – Bayley Scales of Infant and Toddler Development; SD – standard deviation; GMFCS – Gross Motor Function Classification System; HDP – hypertensive disorders of pregnancy; NS – not stated/defined; MDI – mental development index; PDI – psychomotor development index; GA – gestational age

Newcastle-Ottawa Scale: ★ – point awarded; ½ – half point awarded

GRADE Assessment: Low rating indicates no serious concerns in GRADE domains and no other considerations were made; a–serious rating for imprecision due to small sample size/wide 95% CI's; b–serious rating for risk of bias due to low Newcastle-Ottawa scale rating (i.e., <6 stars). For pooled outcomes refer to eTable 6.

**Green font**– a statistically sign

Significant beneficial outcome, **grey highlighting** – not measured/reported, **red font**– a statistically significant harmful outcome

**eTable 6.** Summary of Findings Table of Secondary Meta-analyzed Outcomes in a Systematic Review and Meta-analysis of Long-Term Outcomes Associated with Preterm Exposure to Antenatal Corticosteroids

| Certainty assessment                                 |                       |              |               |              |             |                      | № of patients        |                  | Effect                        |                                                    | Certainty   |
|------------------------------------------------------|-----------------------|--------------|---------------|--------------|-------------|----------------------|----------------------|------------------|-------------------------------|----------------------------------------------------|-------------|
| № of studies                                         | Study design          | Risk of bias | Inconsistency | Indirectness | Imprecision | Other considerations | Single course of ACS | unexposed to ACS | Relative (95% CI)             | Absolute (95% CI)                                  |             |
| <b>A single course of ACS versus those unexposed</b> |                       |              |               |              |             |                      |                      |                  |                               |                                                    |             |
| <b><i>Children born preterm</i></b>                  |                       |              |               |              |             |                      |                      |                  |                               |                                                    |             |
| Cerebral palsy (adjusted)                            |                       |              |               |              |             |                      |                      |                  |                               |                                                    |             |
| Two studies                                          | observational studies | not serious  | not serious   | not serious  | not serious | none                 | -                    | -                | <b>OR 0.60 (0.43 to 0.83)</b> | <b>1 fewer per 1,000 (from 1 fewer to 0 fewer)</b> | ⊕⊕○○<br>Low |
| Moderate/severe cerebral palsy (adjusted)            |                       |              |               |              |             |                      |                      |                  |                               |                                                    |             |
| Two studies                                          | observational studies | not serious  | not serious   | not serious  | not serious | none                 | -                    | -                | OR 0.82 (0.56 to 1.19)        | 1 fewer per 1,000 (from 1 fewer to 0 fewer)        | ⊕⊕○○<br>Low |



| Certainty assessment           |                       |                      |               |              |                      |                      | № of patients        |                  | Effect                 |                                             | Certainty        |
|--------------------------------|-----------------------|----------------------|---------------|--------------|----------------------|----------------------|----------------------|------------------|------------------------|---------------------------------------------|------------------|
| № of studies                   | Study design          | Risk of bias         | Inconsistency | Indirectness | Imprecision          | Other considerations | Single course of ACS | unexposed to ACS | Relative (95% CI)      | Absolute (95% CI)                           |                  |
| Auditory impairment (adjusted) |                       |                      |               |              |                      |                      |                      |                  |                        |                                             |                  |
| Three studies                  | observational studies | serious <sup>a</sup> | not serious   | not serious  | serious <sup>b</sup> | none                 | -                    | -                | OR 0.58 (0.33 to 1.01) | 1 fewer per 1,000 (from 1 fewer to 0 fewer) | ⊕○○○<br>Very low |
| Visual impairment (adjusted)   |                       |                      |               |              |                      |                      |                      |                  |                        |                                             |                  |
| Three studies                  | observational studies | serious <sup>a</sup> | not serious   | not serious  | serious <sup>b</sup> | none                 | -                    | -                | OR 1.42 (0.57 to 3.54) | 1 fewer per 1,000 (from 1 fewer to 0 fewer) | ⊕○○○<br>Very low |

| Certainty assessment                       |                       |              |               |              |             |                      | № of patients        |                  | Effect                        |                                                      | Certainty   |
|--------------------------------------------|-----------------------|--------------|---------------|--------------|-------------|----------------------|----------------------|------------------|-------------------------------|------------------------------------------------------|-------------|
| № of studies                               | Study design          | Risk of bias | Inconsistency | Indirectness | Imprecision | Other considerations | Single course of ACS | unexposed to ACS | Relative (95% CI)             | Absolute (95% CI)                                    |             |
| Neurodevelopmental impairment (unadjusted) |                       |              |               |              |             |                      |                      |                  |                               |                                                      |             |
| Four studies                               | observational studies | not serious  | not serious   | not serious  | not serious | none                 | 1049/3452 (30.4%)    | 253/596 (42.4%)  | RR 0.83 (0.65 to 1.05)        | 72 fewer per 1,000 (from 149 fewer to 21 more)       | ⊕⊕○○<br>Low |
| Cerebral palsy (unadjusted)                |                       |              |               |              |             |                      |                      |                  |                               |                                                      |             |
| Four studies                               | observational studies | not serious  | not serious   | not serious  | not serious | none                 | 390/3453 (11.3%)     | 105/597 (17.6%)  | <b>RR 0.73 (0.56 to 0.96)</b> | <b>47 fewer per 1,000</b> (from 77 fewer to 7 fewer) | ⊕⊕○○<br>Low |

| Certainty assessment                      |                       |              |                      |              |                      |                      | № of patients        |                  | Effect                 |                                                 | Certainty        |
|-------------------------------------------|-----------------------|--------------|----------------------|--------------|----------------------|----------------------|----------------------|------------------|------------------------|-------------------------------------------------|------------------|
| № of studies                              | Study design          | Risk of bias | Inconsistency        | Indirectness | Imprecision          | Other considerations | Single course of ACS | unexposed to ACS | Relative (95% CI)      | Absolute (95% CI)                               |                  |
| BSID MDI-II <70 (unadjusted)              |                       |              |                      |              |                      |                      |                      |                  |                        |                                                 |                  |
| Four studies                              | observational studies | not serious  | not serious          | not serious  | serious <sup>b</sup> | none                 | 339/1071 (31.7%)     | 78/194 (40.2%)   | RR 0.94 (0.72 to 1.23) | 24 fewer per 1,000 (from 113 fewer to 92 more)  | ⊕○○○<br>Very low |
| BSID-III cognitive score <85 (unadjusted) |                       |              |                      |              |                      |                      |                      |                  |                        |                                                 |                  |
| Three studies                             | observational studies | not serious  | serious <sup>c</sup> | not serious  | serious <sup>b</sup> | none                 | 643/2569 (25.0%)     | 175/470 (37.2%)  | RR 0.56 (0.28 to 1.13) | 164 fewer per 1,000 (from 268 fewer to 48 more) | ⊕○○○<br>Very low |

| Certainty assessment             |                       |                      |               |              |                      |                      | № of patients        |                  | Effect                 |                                              | Certainty        |
|----------------------------------|-----------------------|----------------------|---------------|--------------|----------------------|----------------------|----------------------|------------------|------------------------|----------------------------------------------|------------------|
| № of studies                     | Study design          | Risk of bias         | Inconsistency | Indirectness | Imprecision          | Other considerations | Single course of ACS | unexposed to ACS | Relative (95% CI)      | Absolute (95% CI)                            |                  |
| Auditory impairment (unadjusted) |                       |                      |               |              |                      |                      |                      |                  |                        |                                              |                  |
| Four studies                     | observational studies | serious <sup>a</sup> | not serious   | not serious  | serious <sup>b</sup> | none                 | 62/3561 (1.7%)       | 17/616 (2.8%)    | RR 0.63 (0.37 to 1.07) | 10 fewer per 1,000 (from 17 fewer to 2 more) | ⊕○○○<br>Very low |
| Visual impairment (unadjusted)   |                       |                      |               |              |                      |                      |                      |                  |                        |                                              |                  |
| Four studies                     | observational studies | serious <sup>a</sup> | not serious   | not serious  | serious <sup>b</sup> | none                 | 38/3558 (1.1%)       | 6/615 (1.0%)     | RR 1.33 (0.58 to 3.08) | 3 more per 1,000 (from 4 fewer to 20 more)   | ⊕○○○<br>Very low |

| Certainty assessment     |                       |                      |               |              |                      |                      | № of patients        |                  | Effect                 |                                               | Certainty        |
|--------------------------|-----------------------|----------------------|---------------|--------------|----------------------|----------------------|----------------------|------------------|------------------------|-----------------------------------------------|------------------|
| № of studies             | Study design          | Risk of bias         | Inconsistency | Indirectness | Imprecision          | Other considerations | Single course of ACS | unexposed to ACS | Relative (95% CI)      | Absolute (95% CI)                             |                  |
| Hemiparesis (unadjusted) |                       |                      |               |              |                      |                      |                      |                  |                        |                                               |                  |
| Two studies              | observational studies | serious <sup>a</sup> | not serious   | not serious  | serious <sup>b</sup> | none                 | 5/815 (0.6%)         | 1/150 (0.7%)     | RR 0.83 (0.14 to 5.02) | 1 fewer per 1,000 (from 6 fewer to 27 more)   | ⊕○○○<br>Very low |
| Diparesis (unadjusted)   |                       |                      |               |              |                      |                      |                      |                  |                        |                                               |                  |
| Two studies              | observational studies | serious <sup>a</sup> | not serious   | not serious  | serious <sup>b</sup> | none                 | 8/815 (1.0%)         | 5/150 (3.3%)     | RR 0.35 (0.06 to 2.18) | 22 fewer per 1,000 (from 31 fewer to 39 more) | ⊕○○○<br>Very low |

| Certainty assessment                 |                       |              |                      |              |                      |                      | № of patients        |                  | Effect            |                                          | Certainty        |
|--------------------------------------|-----------------------|--------------|----------------------|--------------|----------------------|----------------------|----------------------|------------------|-------------------|------------------------------------------|------------------|
| № of studies                         | Study design          | Risk of bias | Inconsistency        | Indirectness | Imprecision          | Other considerations | Single course of ACS | unexposed to ACS | Relative (95% CI) | Absolute (95% CI)                        |                  |
| Body weight (kg) (unadjusted)        |                       |              |                      |              |                      |                      |                      |                  |                   |                                          |                  |
| Two studies                          | observational studies | not serious  | serious <sup>c</sup> | not serious  | serious <sup>b</sup> | none                 | 2453                 | 424              | -                 | MD 0.29 lower (1.1 lower to 0.51 higher) | ⊕○○○<br>Very low |
| Head circumference (cm) (unadjusted) |                       |              |                      |              |                      |                      |                      |                  |                   |                                          |                  |
| Two studies                          | observational studies | not serious  | serious <sup>c</sup> | not serious  | serious <sup>b</sup> | none                 | 2396                 | 421              | -                 | MD 0.33 lower (1.6 lower to 0.93 higher) | ⊕○○○<br>Very low |

| Certainty assessment                                               |                       |              |               |              |             |                      | № of patients        |                  | Effect                        |                                                      | Certainty        |
|--------------------------------------------------------------------|-----------------------|--------------|---------------|--------------|-------------|----------------------|----------------------|------------------|-------------------------------|------------------------------------------------------|------------------|
| № of studies                                                       | Study design          | Risk of bias | Inconsistency | Indirectness | Imprecision | Other considerations | Single course of ACS | unexposed to ACS | Relative (95% CI)             | Absolute (95% CI)                                    |                  |
| <i>Unspecified number of courses of ACS versus those unexposed</i> |                       |              |               |              |             |                      |                      |                  |                               |                                                      |                  |
| <i>Children born preterm</i>                                       |                       |              |               |              |             |                      |                      |                  |                               |                                                      |                  |
| Neurodevelopmental impairment (unadjusted)                         |                       |              |               |              |             |                      |                      |                  |                               |                                                      |                  |
| Five studies                                                       | observational studies | not serious  | not serious   | not serious  | not serious | none                 | 399/1547 (25.8%)     | 297/1175 (25.3%) | OR 0.96 (0.61 to 1.50)        | 8 fewer per 1,000 (from 82 fewer to 84 more)         | ⊕○○○<br>Very low |
| Cerebral palsy (unadjusted)                                        |                       |              |               |              |             |                      |                      |                  |                               |                                                      |                  |
| Three studies                                                      | observational studies | not serious  | not serious   | not serious  | not serious | none                 | 453/5651 (8.0%)      | 456/4916 (9.3%)  | <b>RR 0.86 (0.76 to 0.98)</b> | <b>13 fewer per 1,000</b> (from 22 fewer to 2 fewer) | ⊕⊕○○<br>Low      |

| Certainty assessment             |                       |              |               |              |                      |                      | № of patients        |                  | Effect                        |                                                    | Certainty        |
|----------------------------------|-----------------------|--------------|---------------|--------------|----------------------|----------------------|----------------------|------------------|-------------------------------|----------------------------------------------------|------------------|
| № of studies                     | Study design          | Risk of bias | Inconsistency | Indirectness | Imprecision          | Other considerations | Single course of ACS | unexposed to ACS | Relative (95% CI)             | Absolute (95% CI)                                  |                  |
| Auditory impairment (unadjusted) |                       |              |               |              |                      |                      |                      |                  |                               |                                                    |                  |
| Two studies                      | observational studies | not serious  | not serious   | not serious  | serious <sup>b</sup> | none                 | 33/4372 (0.8%)       | 44/3618 (1.2%)   | <b>RR 0.57 (0.36 to 0.90)</b> | <b>5 fewer per 1,000</b> (from 8 fewer to 1 fewer) | ⊕○○○<br>Very low |
| Visual impairment (unadjusted)   |                       |              |               |              |                      |                      |                      |                  |                               |                                                    |                  |
| Two studies                      | observational studies | not serious  | not serious   | not serious  | serious <sup>b</sup> | none                 | 304/5239 (5.8%)      | 243/4749 (5.1%)  | RR 1.15 (0.97 to 1.35)        | 8 more per 1,000 (from 2 fewer to 18 more)         | ⊕○○○<br>Very low |

**Legend:**

BSID–Bayley Scales of Infant and Toddler Development; MDI – mental development index; CI– confidence interval; MD– mean difference; OR–odds ratio; RR–risk ratio; bold– statistically significant

**GRADE explanations**

a. at least one larger study has a high risk of bias rating; b. Small number of total events and wide 95% CI's; c. Significant heterogeneity between studies



**eTable 7.** Other Long-Term Outcomes of Included Studies in a Systematic Review and Meta-analysis of Long-Term Outcomes Associated with Preterm Exposure to Antenatal Corticosteroids

| Study (country)<br>[Risk of bias<br>assessment] | Other outcome(s)                                                                                                                             | Single course of ACS                |                       | Unexposed group                    |                       | Reported<br>effect measure<br>+ size (95% CI) | GRADE<br>certainty              |
|-------------------------------------------------|----------------------------------------------------------------------------------------------------------------------------------------------|-------------------------------------|-----------------------|------------------------------------|-----------------------|-----------------------------------------------|---------------------------------|
|                                                 |                                                                                                                                              | Mean (SD)                           | No. /<br>Total<br>No. | Mean (SD)                          | No. /<br>Total<br>No. |                                               |                                 |
| <i>Children born preterm</i>                    |                                                                                                                                              |                                     |                       |                                    |                       |                                               |                                 |
| Chawla, 2013<br>(U.S.) <sup>3</sup><br>★★★★★★★  | Body weight at follow-up (kg)                                                                                                                | 81.2 (4.2)                          |                       | 80.7 (3.7)                         |                       |                                               | Meta-analyzed<br>(eTable 6)     |
|                                                 | Length at follow-up (cm)                                                                                                                     | 46.5 (1.6)                          |                       | 47.8 (2.4)                         |                       |                                               | Meta-analyzed<br>(eTable 6)     |
| Gover 2012<br>(Canada) <sup>2</sup><br>★★★★★★½  | Cortisol level at 18 months (ug/dl)                                                                                                          | Median: 0.13<br>(IQR 0.07-<br>0.24) |                       | Median:0.11<br>(IQR 0.06-<br>1.15) |                       |                                               | ⊕○○○<br>Very low <sup>a</sup>   |
| Chawla, 2016<br>(U.S.) <sup>3</sup><br>★★★★★★★  | Body weight at follow-up (kg)                                                                                                                | 10.8 (1.57)                         |                       | 10.76 (1.57)                       |                       | Adj MD: 0.02<br>(-0.15-0.19)                  | Meta-analyzed<br>(eTable 6)     |
|                                                 | Head circumference (cm)                                                                                                                      | 46.9 (2)                            |                       | 46.8 (3.2)                         |                       | Adj MD: -0.05<br>(-0.28-0.18)                 | Meta-analyzed<br>(eTable 6)     |
|                                                 | Intact survival (defined as the absence of any cerebral palsy, deafness, or blindness and a BSID-III cognitive score of ≥85 at 18-22 months) | 1670/2405                           |                       | 233/419                            |                       | <b>Adj OR: 1.51<br/>(1.2-1.9)</b>             | ⊕⊕○○<br>Low                     |
| Tseng, 2016<br>(Taiwan) <sup>10</sup>           | Allergic disease                                                                                                                             |                                     | 18/24                 |                                    | 3/16                  | <b>NS; p&lt;0.0001</b>                        | ⊕○○○<br>Very low <sup>a,b</sup> |

|       |                   |  |       |  |      |                    |                                 |
|-------|-------------------|--|-------|--|------|--------------------|---------------------------------|
| ★★★★½ | Asthma            |  | 10/24 |  | 0/16 | <b>NS; p=0.003</b> | ⊕○○○<br>Very low <sup>a,b</sup> |
|       | Allergic rhinitis |  | 14/24 |  | 3/16 | <b>NS; p=0.013</b> | ⊕○○○<br>Very low <sup>a,b</sup> |
|       | Atopic dermatitis |  | 6/24  |  | 1/16 | NS; p=0.126        | ⊕○○○<br>Very low <sup>a,b</sup> |

**Legend:**

ACS – antenatal corticosteroids; SD – standard deviation; No. – number; CI – confidence interval; kg – kilograms; Adj – adjusted; MD – mean difference; cm – centimeters; BSID – Bayley Scales of Infant and Toddler Development; OR – odds ratio; NS – not stated; IQR – interquartile ratio;

Newcastle-Ottawa Scale: ★ – point awarded, ½ – half point awarded

\*RoB assessments for each outcome for the study resulted in the same domain scores

**Green font** – a statistically significant beneficial outcome, grey highlighting – not measured/reported, **red font** – a statistically significant harmful outcome

**eTable 8.** Newcastle-Ottawa Scale Quality Assessment Scores for Non-Randomized Studies Included in a Systematic Review and Meta-analysis of Long-Term Outcomes Associated with Preterm Exposure to Antenatal Corticosteroids

| Study, Year (Country)                                              | Total score (max: 9★) | Component scores                              |                                          |                                    |                                                                                |                                                                       |                                   |                                                       |                                       |
|--------------------------------------------------------------------|-----------------------|-----------------------------------------------|------------------------------------------|------------------------------------|--------------------------------------------------------------------------------|-----------------------------------------------------------------------|-----------------------------------|-------------------------------------------------------|---------------------------------------|
|                                                                    |                       | Representativeness of exposed cohort (max: ★) | Selection of non-exposed cohort (max: ★) | Ascertainment of exposure (max: ★) | Demonstration that outcome of interest was not present at study start (max: ★) | † Comparability of cohorts based on the design or analysis* (max: ★★) | Ascertainment of outcome (max: ★) | Follow-up long enough for outcomes to occur? (max: ★) | Adequacy of cohort follow up (max: ★) |
| <b>A single course of ACS versus those unexposed</b>               |                       |                                               |                                          |                                    |                                                                                |                                                                       |                                   |                                                       |                                       |
| <i>Children born preterm</i>                                       |                       |                                               |                                          |                                    |                                                                                |                                                                       |                                   |                                                       |                                       |
| Chawla, 2013 (United States) <sup>1</sup>                          | 8 ★★★★★★★★            | ★                                             | ★                                        | ★                                  | ★                                                                              | ★★☆                                                                   | ★                                 | ★                                                     | ★                                     |
| Gover, 2012 (Canada) <sup>2</sup>                                  | 7.5 ★★★★★★½           | ★                                             | ★                                        | ★                                  | ★                                                                              | ★½                                                                    | ☆                                 | ★                                                     | ★                                     |
| Chawla, 2016 (United States) <sup>3</sup>                          | 7 ★★★★★★★★            | ★                                             | ★                                        | ★                                  | ☆                                                                              | ★★☆                                                                   | ★                                 | ★                                                     | ★                                     |
| Lee, 2008 (United States) <sup>4</sup>                             | 6.5 ★★★★★★½           | ★                                             | ★                                        | ★                                  | ★                                                                              | ★½                                                                    | ☆                                 | ★                                                     | ☆                                     |
| Agarwal, 2018 (Singapore) <sup>5</sup>                             | 6 ★★★★★★★★            | ★                                             | ★                                        | ★                                  | ★                                                                              | ☆☆                                                                    | ☆                                 | ★                                                     | ★                                     |
| Kim, 2018 (Korea) <sup>6</sup>                                     | 5.5 ★★★★★★½           | ★                                             | ★                                        | ★                                  | ★                                                                              | ½                                                                     | ☆                                 | ★                                                     | ☆                                     |
| Laughon, 2009 (United States) <sup>7</sup>                         | 5.5 ★★★★★★½           | ★                                             | ★                                        | ★                                  | ☆                                                                              | ½                                                                     | ★                                 | ★                                                     | ☆                                     |
| McElrath, 2009 (United States) <sup>8</sup>                        | 5.5 ★★★★★★½           | ★                                             | ★                                        | ★                                  | ★                                                                              | ½                                                                     | ☆                                 | ★                                                     | ☆                                     |
| Lardon, 2017 (Spain) <sup>9</sup>                                  | 4.5 ★★★★★★½           | ★                                             | ★                                        | ☆                                  | ★                                                                              | ½                                                                     | ☆                                 | ★                                                     | ☆                                     |
| Tseng, 2016 (Taiwan) <sup>10</sup>                                 | 4.5 ★★★★★★½           | ★                                             | ★                                        | ★                                  | ☆                                                                              | ½                                                                     | ☆                                 | ★                                                     | ☆                                     |
| <b>Unspecified number of courses of ACS versus those unexposed</b> |                       |                                               |                                          |                                    |                                                                                |                                                                       |                                   |                                                       |                                       |
| <i>Children born preterm or at term</i>                            |                       |                                               |                                          |                                    |                                                                                |                                                                       |                                   |                                                       |                                       |

|                                                   |             |   |   |   |   |     |   |   |   |
|---------------------------------------------------|-------------|---|---|---|---|-----|---|---|---|
| Lamminmaki 2021 (Finland) <sup>11</sup>           | 7.5 ★★★★★★½ | ★ | ★ | ★ | ★ | ½   | ★ | ★ | ★ |
| Raikkonen, 2020 (Finland) <sup>12</sup>           | 7.5 ★★★★★★½ | ★ | ★ | ★ | ☆ | ★½  | ★ | ★ | ★ |
| Wolford, 2020 (Finland) <sup>13</sup>             | 7 ★★★★★★    | ★ | ★ | ★ | ☆ | ★★  | ★ | ★ | ☆ |
| <i>Children born preterm</i>                      |             |   |   |   |   |     |   |   |   |
| Haslam, 2018 (Canada) <sup>14</sup>               | 8.5 ★★★★★★½ | ★ | ★ | ★ | ★ | ★½  | ★ | ★ | ★ |
| Aviram, 2021 (Canada) <sup>15</sup>               | 8 ★★★★★★    | ★ | ★ | ★ | ★ | ★   | ★ | ★ | ★ |
| Raikkonen, 2020 (Finland) <sup>12</sup>           | 7.5 ★★★★★★½ | ★ | ★ | ★ | ☆ | ★½  | ★ | ★ | ★ |
| Gentle, 2020 (United States) <sup>16</sup>        | 7 ★★★★★★    | ★ | ★ | ★ | ★ | ★★☆ | ☆ | ★ | ★ |
| Hutcheon, 2020 (Canada) <sup>17</sup>             | 7 ★★★★★★    | ★ | ★ | ★ | ☆ | ★   | ★ | ★ | ★ |
| Bulbul, 2020 (Turkey) <sup>18</sup>               | 6.5 ★★★★★★½ | ★ | ★ | ★ | ★ | ½   | ★ | ★ | ☆ |
| Miyazaki, 2015 (Japan) <sup>19</sup>              | 6.5 ★★★★★★½ | ★ | ★ | ★ | ★ | ½   | ★ | ★ | ☆ |
| Ushida, 2020a (Japan) <sup>20</sup>               | 6.5 ★★★★★★½ | ★ | ★ | ★ | ★ | ½   | ★ | ★ | ☆ |
| Ushida, 2020b (Japan) <sup>21</sup>               | 6.5 ★★★★★★½ | ★ | ★ | ★ | ★ | ½   | ☆ | ★ | ★ |
| Basset, 2018 (France) <sup>22</sup>               | 6 ★★★★★★    | ★ | ★ | ☆ | ★ | ★★☆ | ☆ | ★ | ★ |
| Ishikawa, 2015 (Japan) <sup>23</sup>              | 5.5 ★★★★★½  | ★ | ★ | ★ | ★ | ½   | ☆ | ★ | ☆ |
| Li, 2019 (China) <sup>24</sup>                    | 5.5 ★★★★★½  | ★ | ★ | ★ | ★ | ½   | ☆ | ★ | ☆ |
| Ochiai, 2014 (Japan) <sup>25</sup>                | 5.5 ★★★★★½  | ★ | ★ | ★ | ★ | ½   | ☆ | ★ | ☆ |
| Young, 2016 (Canada) <sup>26</sup>                | 5.5 ★★★★★½  | ★ | ★ | ★ | ★ | ½   | ☆ | ★ | ☆ |
| Kallen, 2015 (Sweden) <sup>27</sup>               | 4.5 ★★★★★½  | ★ | ★ | ★ | ☆ | ½   | ☆ | ★ | ☆ |
| Kiechl-kohlendorfer, 2009 (Austria) <sup>28</sup> | 4.5 ★★★★★½  | ★ | ★ | ☆ | ★ | ½   | ☆ | ★ | ☆ |
| Sun, 2015 (China) <sup>29</sup>                   | 4.5 ★★★★★½  | ★ | ★ | ☆ | ★ | ½   | ☆ | ★ | ☆ |

| <i>Children born at term</i>            |     |          |   |   |   |   |     |   |   |   |
|-----------------------------------------|-----|----------|---|---|---|---|-----|---|---|---|
| Melamed, 2019 (Canada) <sup>30</sup>    | 8   | ★★★★★★★  | ★ | ★ | ★ | ★ | ★★☆ | ★ | ★ | ★ |
| Raikkonen, 2020 (Finland) <sup>12</sup> | 7.5 | ★★★★★★★½ | ★ | ★ | ★ | ☆ | ★½  | ★ | ★ | ★ |

**Legend:**

★ – point awarded; ½ – half point awarded; ☆ – no point awarded, max – maximum; ACS – antenatal corticosteroids

† If the study addressed any of the following confounding variables (whether through exclusion, stratification, adjustment or matching), we assigned ½ star per factor with a maximum of 2 stars total: postnatal steroids; gestational age at birth; family or maternal history of neurodevelopmental and psychological outcomes (including maternal stress); socioeconomic status; maternal substance use (drugs, alcohol or smoking); and intrauterine growth restriction;

**eFigure 1.** Visual Representation of Available Individual Adjusted Neurodevelopmental/Psychological Outcomes in a Systematic Review and Meta-analysis of Long-Term Outcomes Associated with Preterm Exposure to Antenatal Corticosteroids

**A single (i.e., standard) course of ACS versus those unexposed (adjusted odds ratios)**

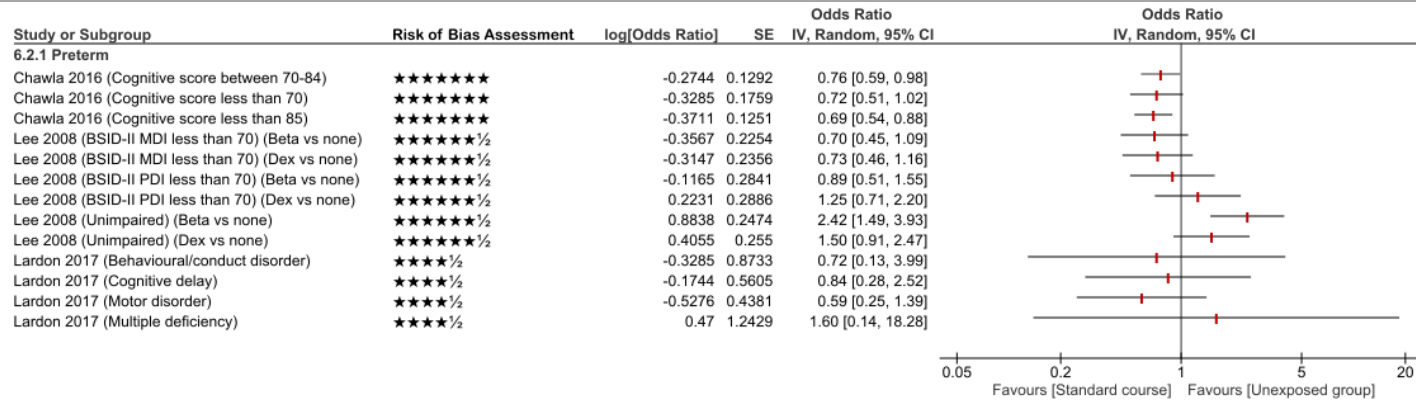

**Unspecified number of courses of ACS versus those unexposed (adjusted odds ratios)**

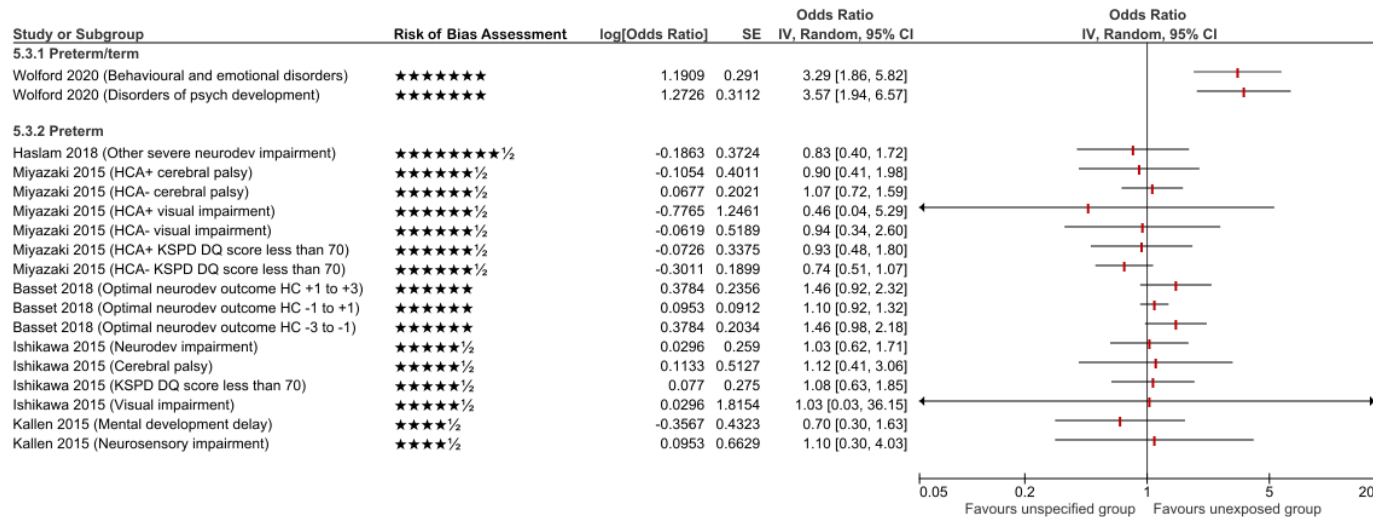

**Unspecified number courses of ACS versus those unexposed (adjusted hazard ratios)**

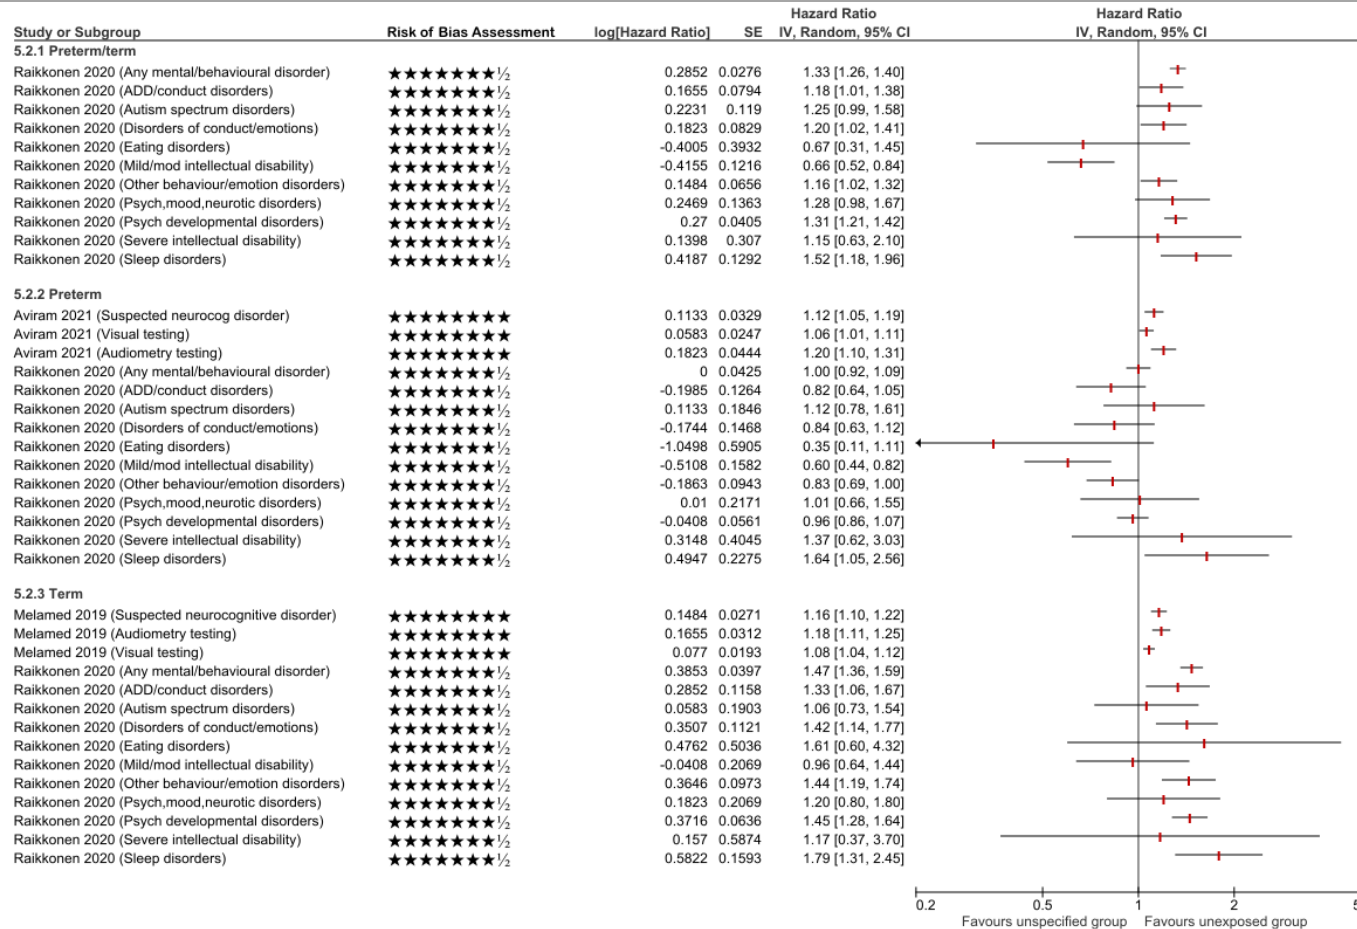

**Legend:**

ACS – antenatal corticosteroids; SE – standard error; IV – instrumental variable; CI – confidence interval; cognitive score – on BSID-III; neurodev – neurodevelopmental; Beta – betamethasone; vs – versus; Dex – dexamethasone; BSID – Bayley Scales of Infant and Toddler Development; MDI – Mental Development Index; PDI – Psychomotor Development Index; HC – head circumference; KSPD – Kyoto Scale of Psychological Development; DQ – developmental quotient; wk – weeks; GA – gestational age; ADD – attention deficit disorder; mod – moderate; Newcastle-Ottawa Scale: ★ – point awarded; ½ – half point awarded

**eFigure 2.** Forest Plots of Sensitivity Analyses and Meta-analyzed Unadjusted Neurodevelopmental/Psychological and Other Outcomes in a Systematic Review and Meta-analysis of Long-Term Outcomes Associated with Preterm Exposure to Antenatal Corticosteroids

**A single (i.e., standard) course of ACS versus those unexposed  
Children born preterm**

**Visual impairment (adjusted data)- sensitivity analysis (removing studies with <6 stars)**

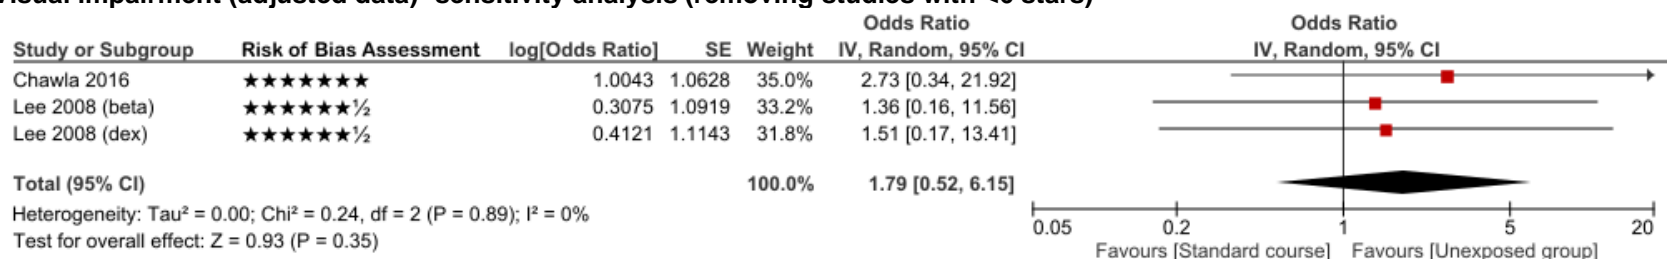

**Auditory impairment (adjusted data)- sensitivity analysis (removing studies with <6 stars)**

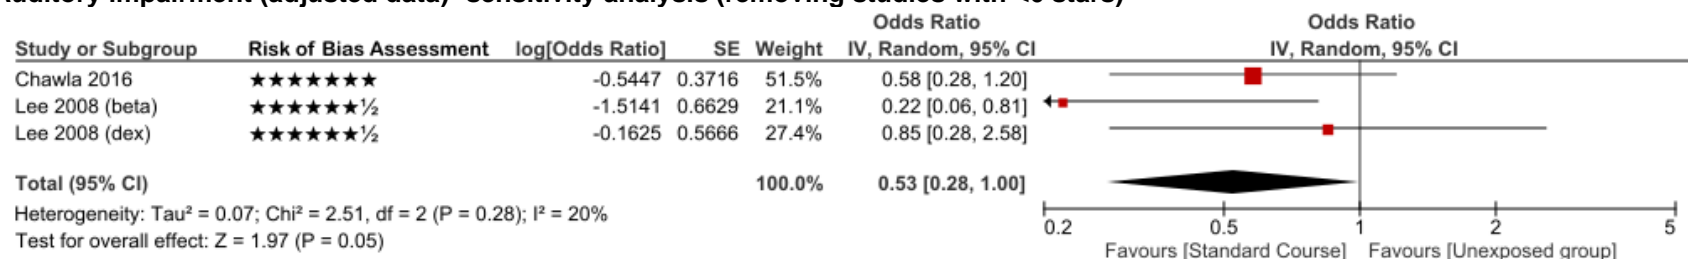



### Neurodevelopmental impairment (unadjusted data)

| Study or Subgroup                                                                                          | Risk of Bias Assessment | Standard Course |             | Unexposed |            | Weight        | Risk Ratio               |
|------------------------------------------------------------------------------------------------------------|-------------------------|-----------------|-------------|-----------|------------|---------------|--------------------------|
|                                                                                                            |                         | Events          | Total       | Events    | Total      |               | IV, Random, 95% CI       |
| Chawla 2013                                                                                                | ★★★★★★                  | 16              | 51          | 3         | 8          | 5.0%          | 0.84 [0.31, 2.23]        |
| Chawla 2016                                                                                                | ★★★★★★                  | 651             | 2405        | 166       | 419        | 33.0%         | 0.68 [0.60, 0.78]        |
| Lee 2008                                                                                                   | ★★★★★½                  | 358             | 971         | 69        | 153        | 29.7%         | 0.82 [0.67, 0.99]        |
| Kim 2018                                                                                                   | ★★★★★½                  | 24              | 25          | 15        | 16         | 32.2%         | 1.02 [0.88, 1.19]        |
| <b>Total (95% CI)</b>                                                                                      |                         |                 | <b>3452</b> |           | <b>596</b> | <b>100.0%</b> | <b>0.83 [0.65, 1.05]</b> |
| Total events                                                                                               |                         | 1049            |             | 253       |            |               |                          |
| Heterogeneity: Tau <sup>2</sup> = 0.04; Chi <sup>2</sup> = 15.46, df = 3 (P = 0.001); I <sup>2</sup> = 81% |                         |                 |             |           |            |               |                          |
| Test for overall effect: Z = 1.55 (P = 0.12)                                                               |                         |                 |             |           |            |               |                          |

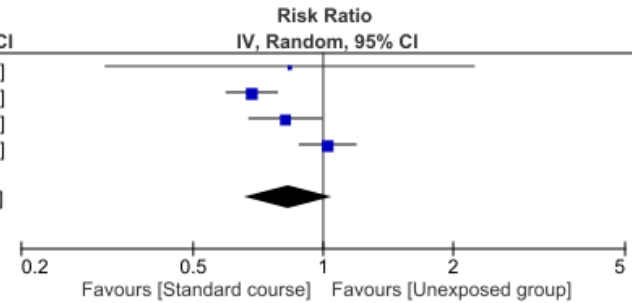

### Cerebral palsy (unadjusted data)

| Study or Subgroup                                                                                        | Risk of Bias Assessment | Standard Course |             | Unexposed |            | Weight        | Risk Ratio               |
|----------------------------------------------------------------------------------------------------------|-------------------------|-----------------|-------------|-----------|------------|---------------|--------------------------|
|                                                                                                          |                         | Events          | Total       | Events    | Total      |               | IV, Random, 95% CI       |
| Chawla 2013                                                                                              | ★★★★★★                  | 13              | 51          | 3         | 8          | 6.7%          | 0.68 [0.25, 1.87]        |
| Chawla 2016                                                                                              | ★★★★★★                  | 252             | 2404        | 73        | 418        | 50.3%         | 0.60 [0.47, 0.76]        |
| Lee 2008                                                                                                 | ★★★★★½                  | 111             | 971         | 20        | 153        | 25.9%         | 0.87 [0.56, 1.36]        |
| Kim 2018                                                                                                 | ★★★★★½                  | 14              | 27          | 9         | 18         | 17.1%         | 1.04 [0.58, 1.87]        |
| <b>Total (95% CI)</b>                                                                                    |                         |                 | <b>3453</b> |           | <b>597</b> | <b>100.0%</b> | <b>0.73 [0.56, 0.96]</b> |
| Total events                                                                                             |                         | 390             |             | 105       |            |               |                          |
| Heterogeneity: Tau <sup>2</sup> = 0.02; Chi <sup>2</sup> = 4.24, df = 3 (P = 0.24); I <sup>2</sup> = 29% |                         |                 |             |           |            |               |                          |
| Test for overall effect: Z = 2.23 (P = 0.03)                                                             |                         |                 |             |           |            |               |                          |

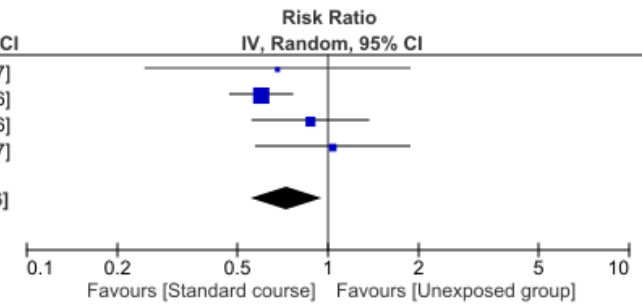

### BSID-II MDI <70 (unadjusted data)

| Study or Subgroup                                                                                        | Risk of Bias Assessment | Standard Course |             | Unexposed |            | Weight        | Risk Ratio               |
|----------------------------------------------------------------------------------------------------------|-------------------------|-----------------|-------------|-----------|------------|---------------|--------------------------|
|                                                                                                          |                         | Events          | Total       | Events    | Total      |               | IV, Random, 95% CI       |
| Chawla 2013                                                                                              | ★★★★★★                  | 14              | 51          | 3         | 8          | 6.7%          | 0.73 [0.27, 1.99]        |
| Lee 2008                                                                                                 | ★★★★★½                  | 298             | 971         | 58        | 153        | 45.7%         | 0.81 [0.65, 1.01]        |
| Kim 2018                                                                                                 | ★★★★★½                  | 24              | 25          | 14        | 17         | 44.4%         | 1.17 [0.92, 1.47]        |
| Tseng 2016                                                                                               | ★★★★½                   | 3               | 24          | 3         | 16         | 3.3%          | 0.67 [0.15, 2.90]        |
| <b>Total (95% CI)</b>                                                                                    |                         |                 | <b>1071</b> |           | <b>194</b> | <b>100.0%</b> | <b>0.94 [0.72, 1.23]</b> |
| Total events                                                                                             |                         | 339             |             | 78        |            |               |                          |
| Heterogeneity: Tau <sup>2</sup> = 0.03; Chi <sup>2</sup> = 5.38, df = 3 (P = 0.15); I <sup>2</sup> = 44% |                         |                 |             |           |            |               |                          |
| Test for overall effect: Z = 0.45 (P = 0.65)                                                             |                         |                 |             |           |            |               |                          |

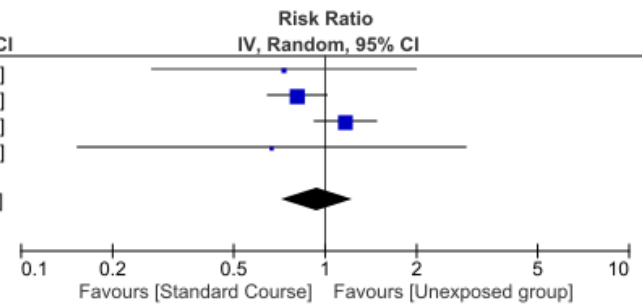

### BSID-III cognitive domain score <85 (unadjusted data)

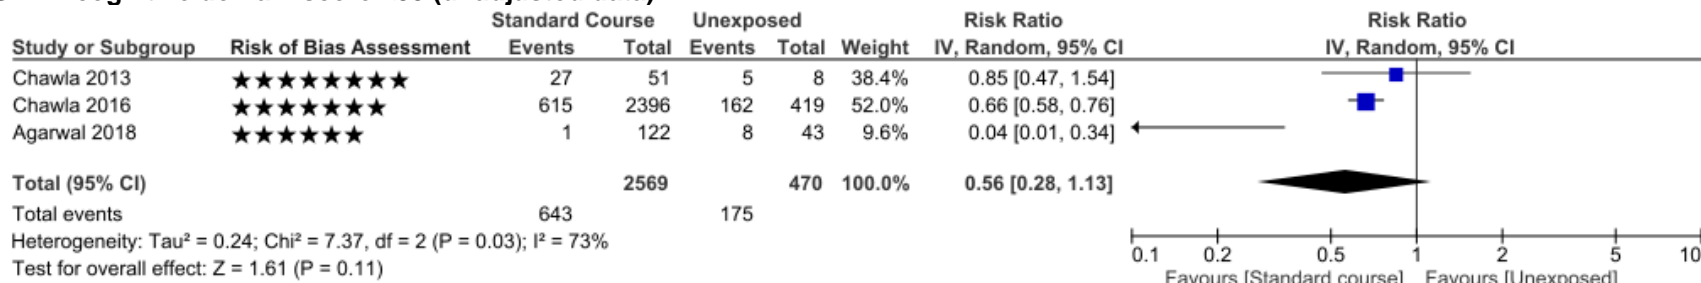

### Auditory impairment (unadjusted data)

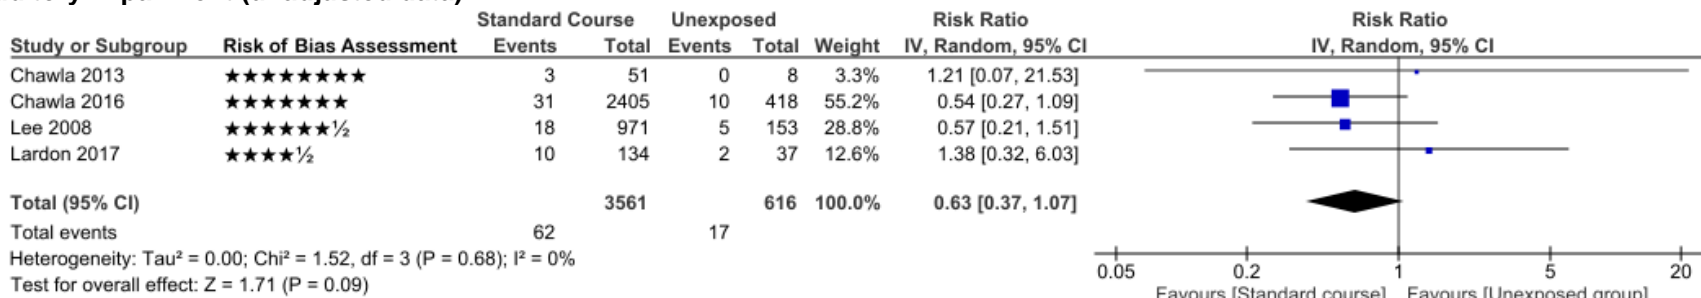

### Visual impairment (unadjusted data)

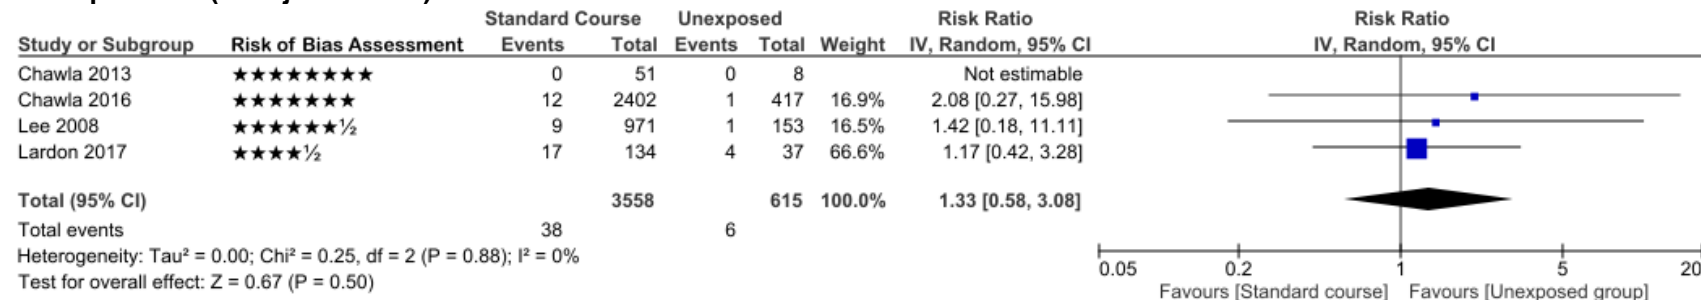

### Hemiparesis (unadjusted data)

| Study or Subgroup                                                                                       | Risk of Bias Assessment | Standard Course |            | Unexposed |            | Weight        | Risk Ratio         |                     |
|---------------------------------------------------------------------------------------------------------|-------------------------|-----------------|------------|-----------|------------|---------------|--------------------|---------------------|
|                                                                                                         |                         | Events          | Total      | Events    | Total      |               | IV, Random, 95% CI | IV, Random, 95% CI  |
| McElrath 2009                                                                                           | ★★★★½                   | 2               | 681        | 0         | 113        | 35.2%         | 0.84               | [0.04, 17.30]       |
| Lardon 2017                                                                                             | ★★★★½                   | 3               | 134        | 1         | 37         | 64.8%         | 0.83               | [0.09, 7.73]        |
| <b>Total (95% CI)</b>                                                                                   |                         |                 | <b>815</b> |           | <b>150</b> | <b>100.0%</b> | <b>0.83</b>        | <b>[0.14, 5.02]</b> |
| Total events                                                                                            |                         | 5               |            | 1         |            |               |                    |                     |
| Heterogeneity: Tau <sup>2</sup> = 0.00; Chi <sup>2</sup> = 0.00, df = 1 (P = 1.00); I <sup>2</sup> = 0% |                         |                 |            |           |            |               |                    |                     |
| Test for overall effect: Z = 0.20 (P = 0.84)                                                            |                         |                 |            |           |            |               |                    |                     |

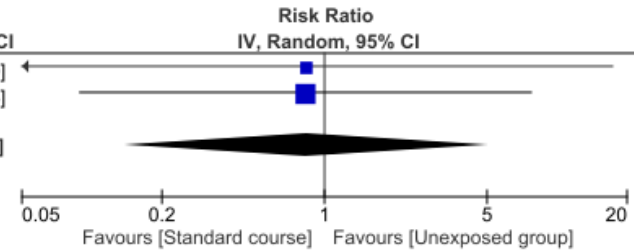

### Diparesis (unadjusted data)

| Study or Subgroup                                                                                        | Risk of Bias Assessment | Standard Course |            | Unexposed |            | Weight        | Risk Ratio         |                     |
|----------------------------------------------------------------------------------------------------------|-------------------------|-----------------|------------|-----------|------------|---------------|--------------------|---------------------|
|                                                                                                          |                         | Events          | Total      | Events    | Total      |               | IV, Random, 95% CI | IV, Random, 95% CI  |
| McElrath 2009                                                                                            | ★★★★½                   | 4               | 681        | 4         | 113        | 60.1%         | 0.17               | [0.04, 0.65]        |
| Lardon 2017                                                                                              | ★★★★½                   | 4               | 134        | 1         | 37         | 39.9%         | 1.10               | [0.13, 9.59]        |
| <b>Total (95% CI)</b>                                                                                    |                         |                 | <b>815</b> |           | <b>150</b> | <b>100.0%</b> | <b>0.35</b>        | <b>[0.06, 2.18]</b> |
| Total events                                                                                             |                         | 8               |            | 5         |            |               |                    |                     |
| Heterogeneity: Tau <sup>2</sup> = 0.94; Chi <sup>2</sup> = 2.11, df = 1 (P = 0.15); I <sup>2</sup> = 53% |                         |                 |            |           |            |               |                    |                     |
| Test for overall effect: Z = 1.12 (P = 0.26)                                                             |                         |                 |            |           |            |               |                    |                     |

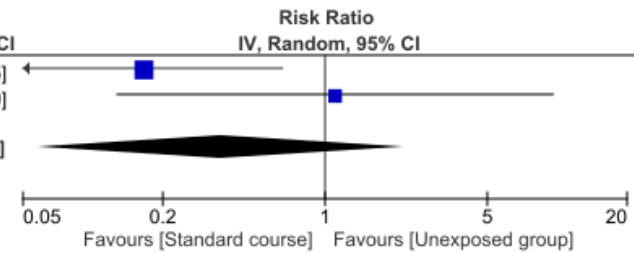

### Body weight (kg) (unadjusted data)

| Study or Subgroup                                                                                        | Risk of Bias Assessment | Standard course |      |             | Unexposed group |      |            | Weight        | Mean Difference    |                      |
|----------------------------------------------------------------------------------------------------------|-------------------------|-----------------|------|-------------|-----------------|------|------------|---------------|--------------------|----------------------|
|                                                                                                          |                         | Mean            | SD   | Total       | Mean            | SD   | Total      |               | IV, Random, 95% CI | IV, Random, 95% CI   |
| Chawla 2013                                                                                              | ★★★★★★★                 | 10.4            | 1.2  | 51          | 11.2            | 1    | 8          | 39.6%         | -0.80              | [-1.57, -0.03]       |
| Chawla 2016                                                                                              | ★★★★★★★                 | 10.8            | 1.57 | 2402        | 10.76           | 1.57 | 416        | 60.4%         | 0.04               | [-0.12, 0.20]        |
| <b>Total (95% CI)</b>                                                                                    |                         |                 |      | <b>2453</b> |                 |      | <b>424</b> | <b>100.0%</b> | <b>-0.29</b>       | <b>[-1.10, 0.51]</b> |
| Heterogeneity: Tau <sup>2</sup> = 0.27; Chi <sup>2</sup> = 4.40, df = 1 (P = 0.04); I <sup>2</sup> = 77% |                         |                 |      |             |                 |      |            |               |                    |                      |
| Test for overall effect: Z = 0.71 (P = 0.48)                                                             |                         |                 |      |             |                 |      |            |               |                    |                      |

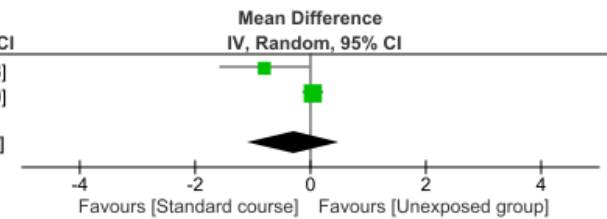

### Head circumference (cm) (unadjusted data)

| Study or Subgroup     | Risk of Bias Assessment | Standard course |     |             | Unexposed group |     |            | Weight        | Mean Difference            |  |
|-----------------------|-------------------------|-----------------|-----|-------------|-----------------|-----|------------|---------------|----------------------------|--|
|                       |                         | Mean            | SD  | Total       | Mean            | SD  | Total      |               | IV, Random, 95% CI         |  |
| Chawla 2013           | ★★★★★★                  | 46.5            | 1.6 | 51          | 47.8            | 2.4 | 8          | 31.0%         | -1.30 [-3.02, 0.42]        |  |
| Chawla 2016           | ★★★★★★                  | 46.9            | 2   | 2345        | 46.8            | 3.2 | 413        | 69.0%         | 0.10 [-0.22, 0.42]         |  |
| <b>Total (95% CI)</b> |                         |                 |     | <b>2396</b> |                 |     | <b>421</b> | <b>100.0%</b> | <b>-0.33 [-1.60, 0.93]</b> |  |

Heterogeneity: Tau<sup>2</sup> = 0.58; Chi<sup>2</sup> = 2.46, df = 1 (P = 0.12); I<sup>2</sup> = 59%  
 Test for overall effect: Z = 0.52 (P = 0.61)

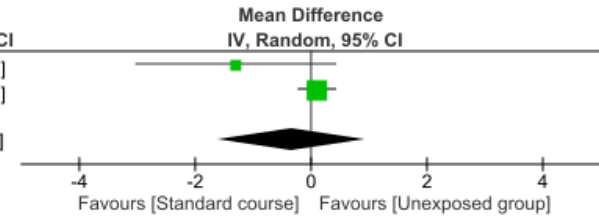

### Unspecified number of courses of ACS versus those unexposed

#### Children born preterm

#### Neurodevelopmental impairment (adjusted data)- sensitivity analysis (removing studies with <6 stars)

| Study or Subgroup     | Risk of Bias Assessment | log[Odds Ratio] | SE     | Weight        | Odds Ratio               |  |
|-----------------------|-------------------------|-----------------|--------|---------------|--------------------------|--|
|                       |                         |                 |        |               | IV, Random, 95% CI       |  |
| Haslam 2018           | ★★★★★★½                 | -0.478          | 0.2365 | 20.6%         | 0.62 [0.39, 0.99]        |  |
| Gentle 2020           | ★★★★★★                  | -0.0202         | 0.2336 | 21.1%         | 0.98 [0.62, 1.55]        |  |
| Miyazaki 2015 (HCA-)  | ★★★★★★½                 | -0.0834         | 0.1618 | 44.0%         | 0.92 [0.67, 1.26]        |  |
| Miyazaki 2015 (HCA+)  | ★★★★★★½                 | -0.0619         | 0.2828 | 14.4%         | 0.94 [0.54, 1.64]        |  |
| <b>Total (95% CI)</b> |                         |                 |        | <b>100.0%</b> | <b>0.86 [0.70, 1.06]</b> |  |

Heterogeneity: Tau<sup>2</sup> = 0.00; Chi<sup>2</sup> = 2.50, df = 3 (P = 0.48); I<sup>2</sup> = 0%  
 Test for overall effect: Z = 1.38 (P = 0.17)

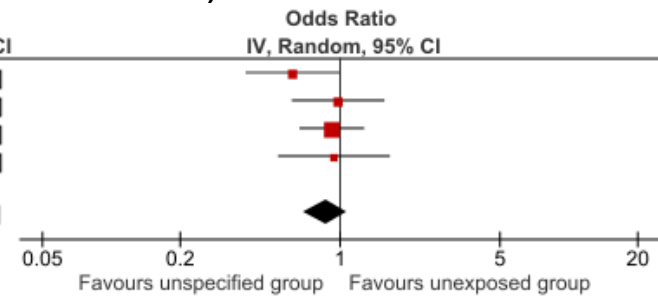

#### Neurodevelopmental impairment (unadjusted data)

| Study or Subgroup        | Risk of Bias Assessment | Standard Course |             | Unexposed |             | Weight        | Risk Ratio               |  |
|--------------------------|-------------------------|-----------------|-------------|-----------|-------------|---------------|--------------------------|--|
|                          |                         | Events          | Total       | Events    | Total       |               | M-H, Random, 95% CI      |  |
| Gentle 2020              | ★★★★★★                  | 76              | 358         | 28        | 158         | 20.8%         | 1.20 [0.81, 1.77]        |  |
| Miyazaki 2015            | ★★★★★★½                 | 151             | 571         | 208       | 843         | 25.3%         | 1.07 [0.89, 1.28]        |  |
| Li 2019                  | ★★★★★★½                 | 10              | 25          | 37        | 106         | 17.1%         | 1.15 [0.66, 1.98]        |  |
| Kiechl-Kohlendorfer 2009 | ★★★★½                   | 48              | 182         | 14        | 23          | 20.3%         | 0.43 [0.29, 0.65]        |  |
| Källén 2015              | ★★★★½                   | 114             | 411         | 10        | 45          | 16.6%         | 1.25 [0.71, 2.20]        |  |
| <b>Total (95% CI)</b>    |                         |                 | <b>1547</b> |           | <b>1175</b> | <b>100.0%</b> | <b>0.95 [0.65, 1.38]</b> |  |

Total events: Standard Course 399, Unexposed 297  
 Heterogeneity: Tau<sup>2</sup> = 0.14; Chi<sup>2</sup> = 18.96, df = 4 (P = 0.0008); I<sup>2</sup> = 79%  
 Test for overall effect: Z = 0.29 (P = 0.77)

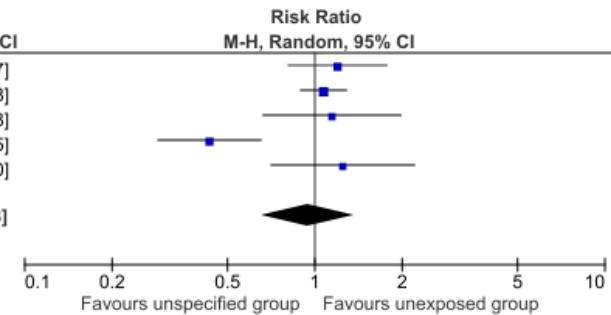

### Cerebral palsy (unadjusted data)

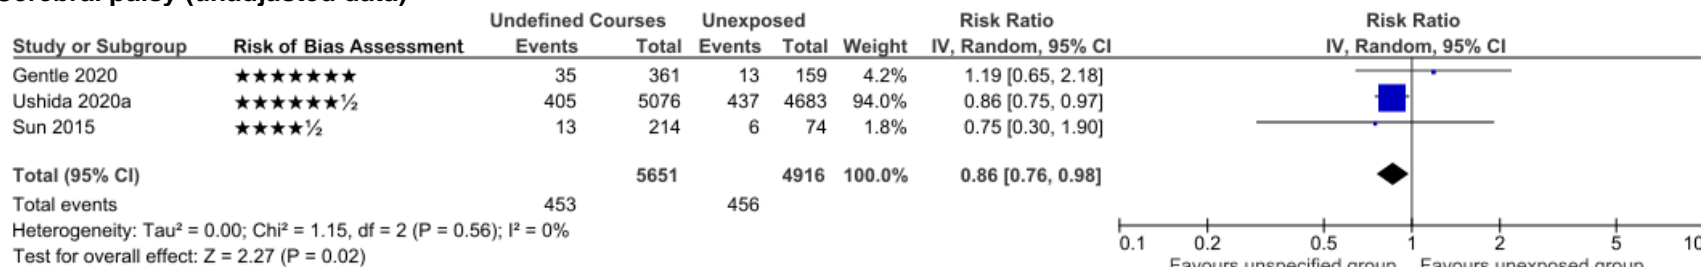

### Auditory impairment (unadjusted data)

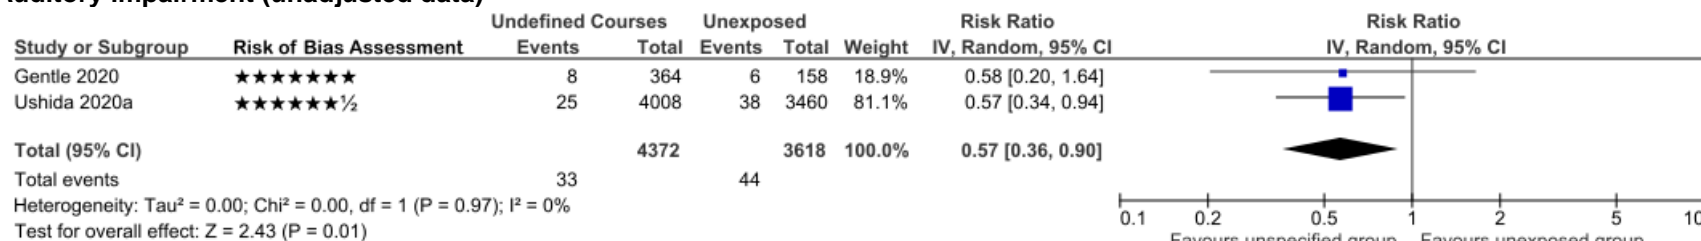

### Visual impairment (unadjusted data)

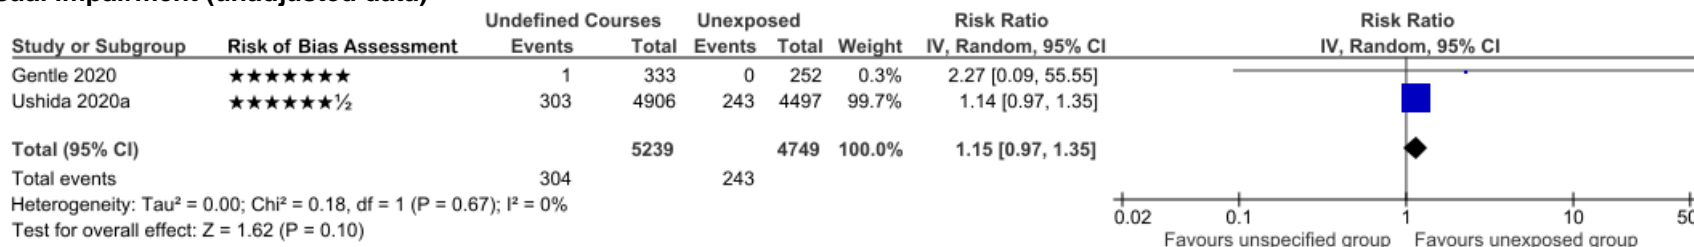

#### Legend:

ACS – antenatal corticosteroids; IV – instrumental variable; CI – confidence interval; BSID – Bayley Scales of Infant and Toddler Development; MDI – Mental Development Index  
 Newcastle-Ottawa Scale: ★ – point awarded; ½ – half point awarded

**Figure 3.** Visual Representation of Available Individual Unadjusted Neurodevelopmental/Psychological Outcomes in a Systematic Review and Meta-analysis of Long-Term Outcomes Associated with Preterm Exposure to Antenatal Corticosteroids

**A single (i.e., standard) course of ACS versus no ACS exposure**

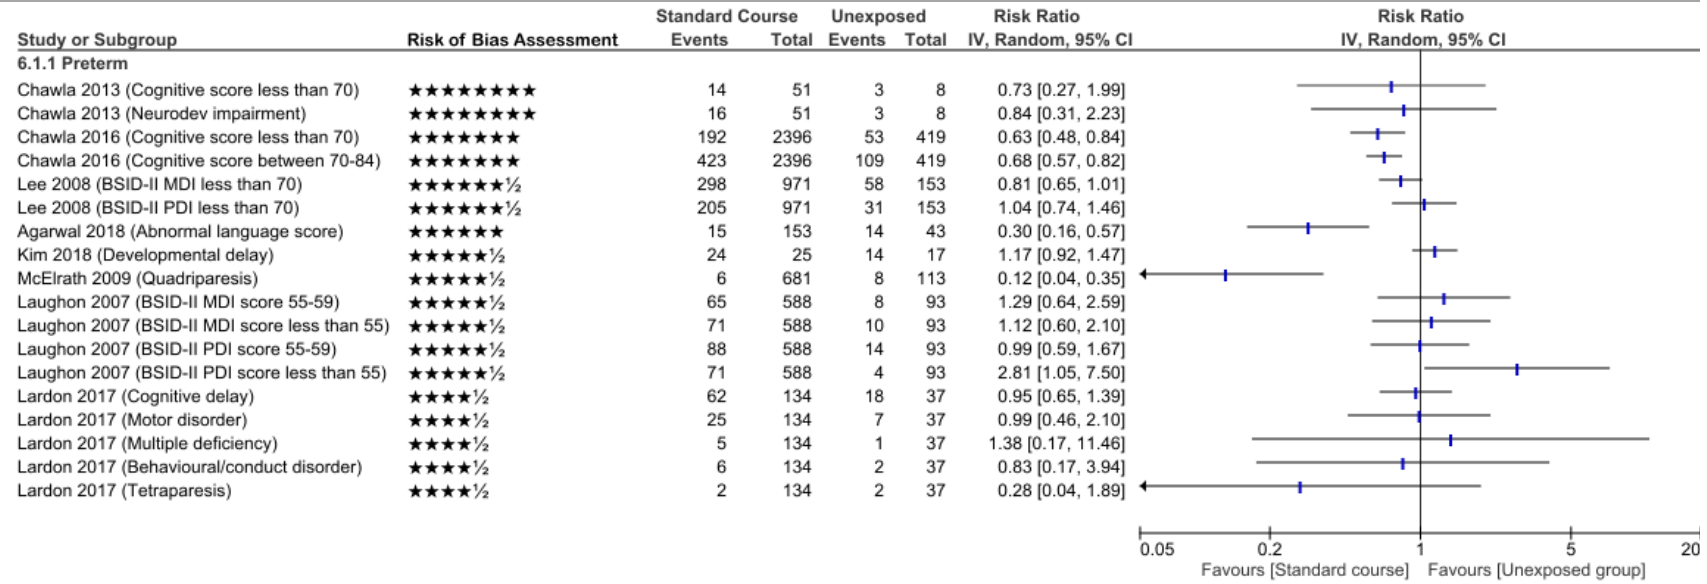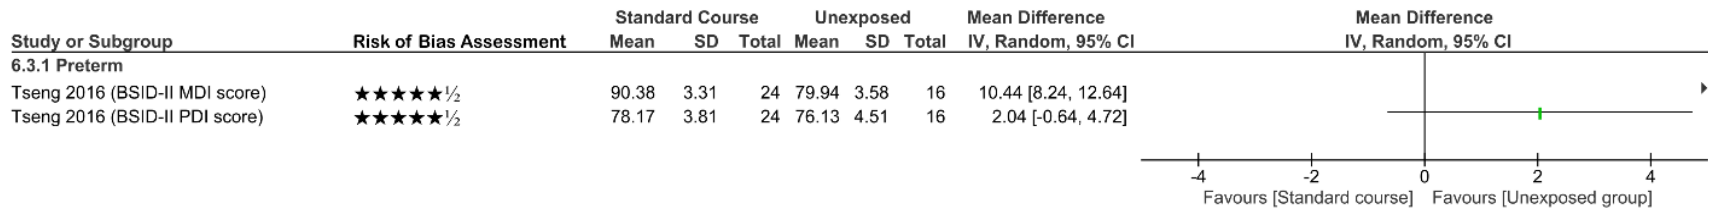

**Unspecified number of courses of ACS versus no ACS exposure**

| Study or Subgroup                                  | Risk of Bias Assessment | Favours [Undefined group] |       | Unexposed |        | Risk Ratio          |                     | Risk Ratio |  |
|----------------------------------------------------|-------------------------|---------------------------|-------|-----------|--------|---------------------|---------------------|------------|--|
|                                                    |                         | Events                    | Total | Events    | Total  | M-H, Random, 95% CI | M-H, Random, 95% CI |            |  |
| <b>5.1.1 Preterm/term</b>                          |                         |                           |       |           |        |                     |                     |            |  |
| Raikkonen 2020 (Any mental/behavioural disorder)   | ★★★★★½                  | 1785                      | 14868 | 44243     | 655229 | 1.78                | [1.70, 1.86]        |            |  |
| Raikkonen 2020 (Autism spectrum disorders)         | ★★★★★½                  | 96                        | 14868 | 2807      | 655229 | 1.51                | [1.23, 1.85]        |            |  |
| Raikkonen 2020 (Disorders of conduct/emotions)     | ★★★★★½                  | 181                       | 14868 | 6350      | 655229 | 1.26                | [1.08, 1.45]        |            |  |
| Raikkonen 2020 (Eating disorders)                  | ★★★★★½                  | 6                         | 14868 | 243       | 655229 | 1.09                | [0.48, 2.45]        |            |  |
| Raikkonen 2020 (Mild/mod intellectual disability)  | ★★★★★½                  | 101                       | 14868 | 2259      | 655229 | 1.97                | [1.62, 2.40]        |            |  |
| Raikkonen 2020 (Other behaviour/emotion disorders) | ★★★★★½                  | 345                       | 14868 | 8049      | 655229 | 1.89                | [1.70, 2.10]        |            |  |
| Raikkonen 2020 (Psych,mood,neurotic disorders)     | ★★★★★½                  | 71                        | 14868 | 2241      | 655229 | 1.40                | [1.10, 1.77]        |            |  |
| Raikkonen 2020 (Psych developmental disorders)     | ★★★★★½                  | 956                       | 14868 | 19089     | 655229 | 2.21                | [2.07, 2.35]        |            |  |
| Raikkonen 2020 (Severe intellectual disability)    | ★★★★★½                  | 18                        | 14868 | 219       | 655229 | 3.62                | [2.24, 5.86]        |            |  |
| Raikkonen 2020 (Sleep disorders)                   | ★★★★★½                  | 79                        | 14868 | 2110      | 655229 | 1.65                | [1.32, 2.06]        |            |  |
| Raikkonen 2020 (ADD/conduct disorders)             | ★★★★★½                  | 216                       | 14868 | 6773      | 655229 | 1.41                | [1.23, 1.61]        |            |  |
| Wolford 2020 (Any mental or behavioural disorder)  | ★★★★★                   | 24                        | 117   | 386       | 4591   | 2.44                | [1.69, 3.53]        |            |  |
| Wolford 2020 (Behavioural and emotional disorders) | ★★★★★                   | 14                        | 117   | 184       | 4591   | 2.99                | [1.79, 4.98]        |            |  |
| Wolford 2020 (Disorders of psych development)      | ★★★★★                   | 19                        | 117   | 238       | 4591   | 3.13                | [2.04, 4.81]        |            |  |
| <b>5.1.2 Preterm</b>                               |                         |                           |       |           |        |                     |                     |            |  |
| Aviram 2021 (Suspected neurocog disorder)          | ★★★★★                   | 1156                      | 2689  | 8581      | 22979  | 1.15                | [1.10, 1.21]        |            |  |
| Aviram 2021 (Visual testing)                       | ★★★★★                   | 1860                      | 2689  | 15483     | 22979  | 1.03                | [1.00, 1.05]        |            |  |
| Aviram 2021 (Audiometry testing)                   | ★★★★★                   | 627                       | 2689  | 4559      | 22979  | 1.18                | [1.09, 1.26]        |            |  |
| Raikkonen 2020 (Any mental/behavioural disorder)   | ★★★★★½                  | 1187                      | 8138  | 2192      | 20472  | 1.36                | [1.28, 1.45]        |            |  |
| Raikkonen 2020 (Autism spectrum disorders)         | ★★★★★½                  | 68                        | 8138  | 123       | 20472  | 1.39                | [1.04, 1.87]        |            |  |
| Raikkonen 2020 (ADD/conduct disorders)             | ★★★★★½                  | 132                       | 8138  | 325       | 20472  | 1.02                | [0.84, 1.25]        |            |  |
| Raikkonen 2020 (Disorders of conduct/emotions)     | ★★★★★½                  | 94                        | 8138  | 273       | 20472  | 0.87                | [0.69, 1.09]        |            |  |
| Raikkonen 2020 (Eating disorders)                  | ★★★★★½                  | 5                         | 8138  | 19        | 20472  | 0.66                | [0.25, 1.77]        |            |  |
| Raikkonen 2020 (Mild/mod intellectual disability)  | ★★★★★½                  | 76                        | 8138  | 166       | 20472  | 1.15                | [0.88, 1.51]        |            |  |
| Raikkonen 2020 (Other behaviour/emotion disorders) | ★★★★★½                  | 230                       | 8138  | 466       | 20472  | 1.24                | [1.06, 1.45]        |            |  |
| Raikkonen 2020 (Psych,mood,neurotic disorders)     | ★★★★★½                  | 47                        | 8138  | 98        | 20472  | 1.21                | [0.85, 1.71]        |            |  |
| Raikkonen 2020 (Psych developmental disorders)     | ★★★★★½                  | 687                       | 8138  | 1095      | 20472  | 1.58                | [1.44, 1.73]        |            |  |
| Raikkonen 2020 (Severe intellectual disability)    | ★★★★★½                  | 15                        | 8138  | 22        | 20472  | 1.72                | [0.89, 3.30]        |            |  |
| Raikkonen 2020 (Sleep disorders)                   | ★★★★★½                  | 38                        | 8138  | 82        | 20472  | 1.17                | [0.79, 1.71]        |            |  |
| Gentle 2020 (BSID-III cog score less than 70)      | ★★★★★                   | 43                        | 355   | 14        | 157    | 1.36                | [0.77, 2.41]        |            |  |
| Gentle 2020 (BSID-III motor score less than 70)    | ★★★★★                   | 59                        | 355   | 22        | 156    | 1.18                | [0.75, 1.85]        |            |  |
| Ushida 2020a (KSPD DQ score less than 70)          | ★★★★★½                  | 500                       | 3320  | 494       | 3126   | 0.95                | [0.85, 1.07]        |            |  |
| Ushida 2020b (Auditory impairment)                 | ★★★★★½                  | 46                        | 3438  | 44        | 2424   | 0.74                | [0.49, 1.11]        |            |  |
| Ushida 2020b (Cerebral palsy)                      | ★★★★★½                  | 329                       | 4485  | 305       | 3309   | 0.80                | [0.69, 0.92]        |            |  |
| Ushida 2020b (KSPD DQ score less than 70)          | ★★★★★½                  | 533                       | 3355  | 367       | 3309   | 1.43                | [1.27, 1.62]        |            |  |
| Ushida 2020b (KSPD DQ score less than 85)          | ★★★★★½                  | 1647                      | 3355  | 1142      | 3309   | 1.42                | [1.34, 1.51]        |            |  |
| Ushida 2020b (Visual impairment)                   | ★★★★★½                  | 238                       | 4344  | 178       | 3174   | 0.98                | [0.81, 1.18]        |            |  |

|                                                    |        |      |      |      |      |                   |
|----------------------------------------------------|--------|------|------|------|------|-------------------|
| Miyazaki 2015 (KSPD DQ score less than 70)         | ★★★★★½ | 89   | 587  | 141  | 859  | 0.92 [0.72, 1.18] |
| Miyazaki 2015 (Severe hearing impairment)          | ★★★★★½ | 7    | 827  | 13   | 1109 | 0.72 [0.29, 1.80] |
| Miyazaki 2015 (Visual impairment)                  | ★★★★★½ | 11   | 830  | 15   | 1096 | 0.97 [0.45, 2.10] |
| Basset 2018 (Optimal neurodev outcome HC +1 to +3) | ★★★★★  | 264  | 344  | 182  | 251  | 1.06 [0.96, 1.16] |
| Basset 2018 (Optimal neurodev outcome HC -1 to +1) | ★★★★★  | 1566 | 2042 | 1082 | 1393 | 0.99 [0.95, 1.02] |
| Basset 2018 (Optimal neurodev outcome HC -3 to -1) | ★★★★★  | 425  | 589  | 258  | 346  | 0.97 [0.89, 1.05] |
| Ishikawa 2015 (Neurodev impairment)                | ★★★★★½ | 66   | 285  | 93   | 505  | 1.26 [0.95, 1.66] |
| Ishikawa 2015 (Cerebral palsy)                     | ★★★★★½ | 19   | 278  | 25   | 498  | 1.36 [0.76, 2.43] |
| Ishikawa 2015 (KSPD DQ score less than 70)         | ★★★★★½ | 51   | 271  | 70   | 486  | 1.31 [0.94, 1.82] |
| Ishikawa 2015 (Severe hearing impairment)          | ★★★★★½ | 0    | 277  | 5    | 502  | 0.16 [0.01, 2.96] |
| Ishikawa 2015 (Visual impairment)                  | ★★★★★½ | 1    | 275  | 3    | 490  | 0.59 [0.06, 5.68] |
| Kallen 2015 (Mental development delay)             | ★★★★½  | 82   | 411  | 6    | 45   | 1.50 [0.69, 3.23] |
| Kallen 2015 (Neurosensory impairment)              | ★★★★½  | 31   | 411  | 3    | 45   | 1.13 [0.36, 3.55] |
| Sun 2015 (BSID-II MDI score less than 70)          | ★★★★½  | 13   | 214  | 6    | 74   | 0.75 [0.30, 1.90] |

#### 5.1.3 Term

|                                                    |        |      |      |        |        |                   |
|----------------------------------------------------|--------|------|------|--------|--------|-------------------|
| Melamed 2019 (Suspected neurocognitive disorder)   | ★★★★★★ | 1397 | 5423 | 113181 | 523782 | 1.19 [1.14, 1.25] |
| Melamed 2019 (Audiometry testing)                  | ★★★★★★ | 827  | 5423 | 66555  | 523782 | 1.20 [1.13, 1.28] |
| Melamed 2019 (Visual testing)                      | ★★★★★★ | 2461 | 5423 | 227948 | 523782 | 1.04 [1.01, 1.07] |
| Raikkonen 2020 (Any mental/behavioural disorder)   | ★★★★★½ | 598  | 6730 | 40051  | 634757 | 1.41 [1.30, 1.52] |
| Raikkonen 2020 (Autism spectrum disorders)         | ★★★★★½ | 28   | 6730 | 2684   | 634757 | 0.98 [0.68, 1.43] |
| Raikkonen 2020 (Disorders of conduct/emotions)     | ★★★★★½ | 87   | 6730 | 6077   | 634757 | 1.35 [1.09, 1.67] |
| Raikkonen 2020 (Eating disorders)                  | ★★★★★½ | 4    | 6730 | 224    | 634757 | 1.68 [0.63, 4.53] |
| Raikkonen 2020 (Mild/mod intellectual disability)  | ★★★★★½ | 25   | 6730 | 2093   | 634757 | 1.13 [0.76, 1.67] |
| Raikkonen 2020 (Other behaviour/emotion disorders) | ★★★★★½ | 115  | 6730 | 7583   | 634757 | 1.43 [1.19, 1.72] |
| Raikkonen 2020 (Psych,mood,neurotic disorders)     | ★★★★★½ | 24   | 6730 | 2143   | 634757 | 1.06 [0.71, 1.58] |
| Raikkonen 2020 (Psych developmental disorders)     | ★★★★★½ | 269  | 6730 | 17994  | 634757 | 1.41 [1.25, 1.59] |
| Raikkonen 2020 (Severe intellectual disability)    | ★★★★★½ | 3    | 6730 | 197    | 634757 | 1.44 [0.46, 4.49] |
| Raikkonen 2020 (Sleep disorders)                   | ★★★★★½ | 41   | 6730 | 2082   | 634757 | 1.86 [1.36, 2.53] |
| Raikkonen 2020 (ADD/conduct disorders)             | ★★★★★½ | 84   | 6730 | 6448   | 634757 | 1.23 [0.99, 1.52] |

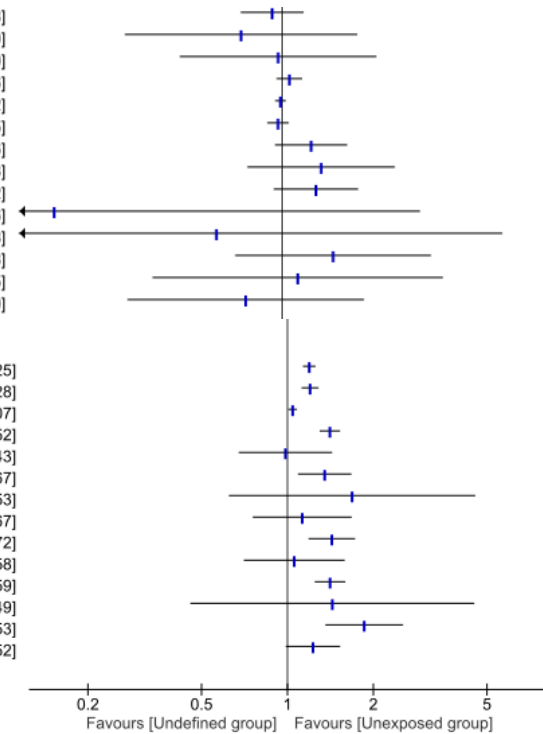

| Study or Subgroup                      | Risk of Bias Assessment | Unspecified Courses |      |       | Unexposed |      |       | Mean Difference       |  |
|----------------------------------------|-------------------------|---------------------|------|-------|-----------|------|-------|-----------------------|--|
|                                        |                         | Mean                | SD   | Total | Mean      | SD   | Total | IV, Random, 95% CI    |  |
| <b>5.4.1 Preterm/term</b>              |                         |                     |      |       |           |      |       |                       |  |
| Lamminmaki 2021 (Male PSAI score)      | ★★★★★½                  | 68.5                | 10.6 | 171   | 68.6      | 9.9  | 213   | -0.10 [-2.17, 1.97]   |  |
| Lamminmaki 2021 (Female PSAI score)    | ★★★★★½                  | 27.5                | 11.3 | 166   | 28.2      | 10   | 186   | -0.70 [-2.94, 1.54]   |  |
| <b>5.4.2 Preterm</b>                   |                         |                     |      |       |           |      |       |                       |  |
| Bulbul 2020 (BSID-III cognitive score) | ★★★★★½                  | 91.4                | 12.3 | 51    | 94.3      | 10.7 | 45    | -2.90 [-7.50, 1.70]   |  |
| Bulbul 2020 (BSID-III language score)  | ★★★★★½                  | 89.5                | 11.6 | 51    | 96.7      | 11.5 | 45    | -7.20 [-11.83, -2.57] |  |
| Bulbul 2020 (BSID-III motor score)     | ★★★★★½                  | 86.3                | 12.1 | 51    | 90.5      | 12.1 | 45    | -4.20 [-9.05, 0.65]   |  |

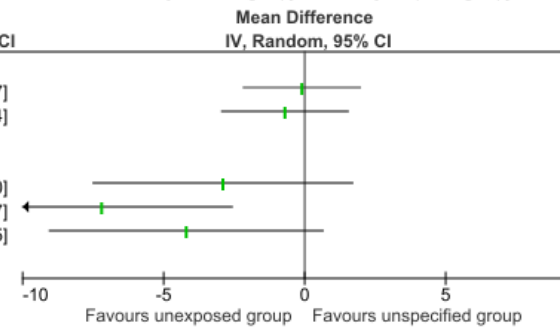



**Legend:**

ACS – antenatal corticosteroids; IV – instrumental variable; CI – confidence interval; neurocog–neurocognitive; neurodev – neurodevelopmental; BSID – Bayley Scales of Infant and Toddler Development; MDI – mental development index; PDI – psychomotor development index; ECBQ - Early Childhood Behaviour Questionnaire; mod – moderate; ADD – attention deficit disorder; KSPD – Kyoto Scale of Psychological Development; DQ – developmental quotient; HC – head circumference

Newcastle-Ottawa Scale: ★ – point awarded; ½ – half point awarded

Cochrane risk of bias 2.0: +: low bias; -: high bias; ?: some concerns regarding bias; D: bias due to deviations from intended interventions; Me: bias in measurement of the outcome; Mi: bias due to missing outcome data; O: overall risk of bias; R: bias arising from the randomization process; S: bias in selection of reported results

**eFigure 4.** Infographic Abstract of a Systematic Review and Meta-analysis of Long-Term Outcomes Associated with Preterm Exposure to Antenatal Corticosteroids

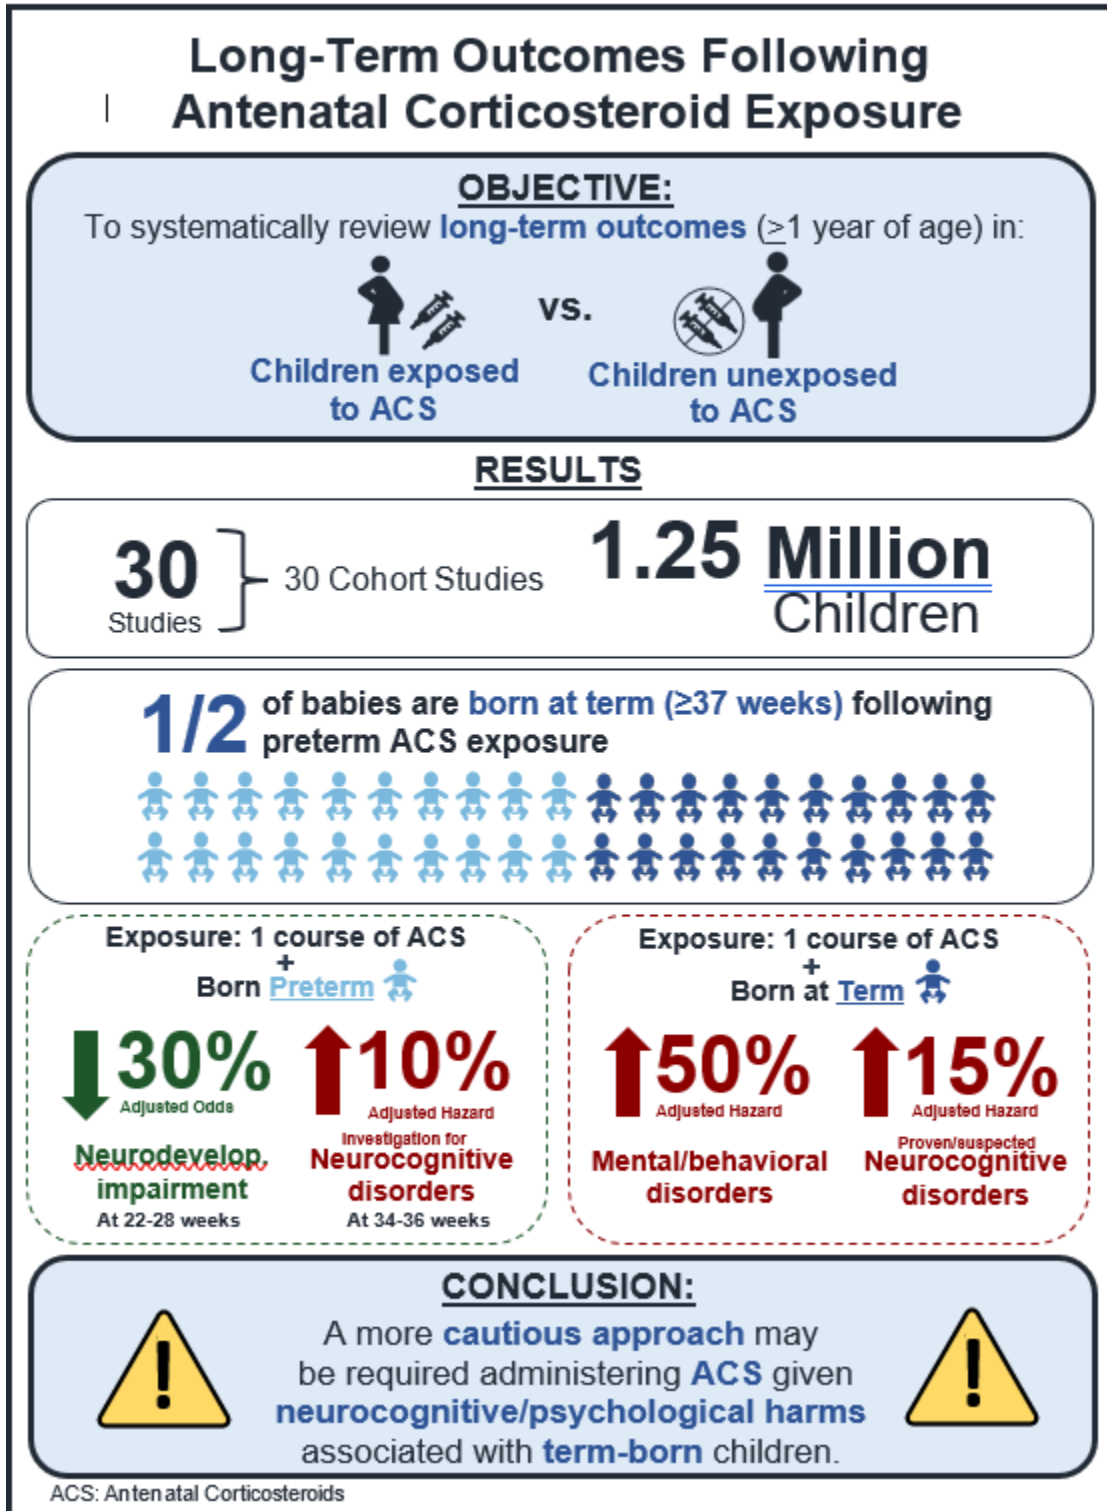

**eAppendix 1. Electronic Search Strategies for a Systematic Review and Meta-analysis of Long-Term Outcomes Associated with Preterm Exposure to Antenatal Corticosteroids**

| <b>Database: OVID Medline (January 1, 2000 – October 29, 2021)</b> |                                                                                                                            |                |
|--------------------------------------------------------------------|----------------------------------------------------------------------------------------------------------------------------|----------------|
| <b>#</b>                                                           | <b>Searches</b>                                                                                                            | <b>Results</b> |
| 1                                                                  | Premature Birth/                                                                                                           | 16486          |
| 2                                                                  | exp Infant, Premature/                                                                                                     | 40544          |
| 3                                                                  | Obstetric Labor, Premature/                                                                                                | 7440           |
| 4                                                                  | Prenatal Care/                                                                                                             | 21468          |
| 5                                                                  | Term Birth/                                                                                                                | 2651           |
| 6                                                                  | exp Infant, Newborn/                                                                                                       | 360439         |
| 7                                                                  | exp Pregnancy/                                                                                                             | 508405         |
| 8                                                                  | pregnan*.mp.                                                                                                               | 554977         |
| 9                                                                  | ((preterm or pre-term or prematur* or term) adj2 (infant* or birth* or child* or deliver* or labour or labor or born)).mp. | 101225         |
| 10                                                                 | lbw.mp.                                                                                                                    | 3304           |
| 11                                                                 | 1 or 2 or 3 or 4 or 5 or 6 or 7 or 8 or 9 or 10                                                                            | 825889         |
| 12                                                                 | Glucocorticoids/                                                                                                           | 53120          |
| 13                                                                 | (antenatal adj4 (cortico* or steroid*)).mp.                                                                                | 2023           |
| 14                                                                 | exp Betamethasone/                                                                                                         | 4181           |
| 15                                                                 | exp Dexamethasone/                                                                                                         | 30186          |
| 16                                                                 | betamethasone.mp.                                                                                                          | 4028           |
| 17                                                                 | celestone.mp.                                                                                                              | 36             |
| 18                                                                 | dexamethasone.mp.                                                                                                          | 43199          |
| 19                                                                 | 12 or 13 or 14 or 15 or 16 or 17 or 18                                                                                     | 89907          |
| 20                                                                 | Prenatal Exposure Delayed Effects/                                                                                         | 26737          |
| 21                                                                 | (follow* adj1 up).mp.                                                                                                      | 1110497        |
| 22                                                                 | (long* adj1 term).mp.                                                                                                      | 651070         |
| 23                                                                 | (delay* adj2 effect*).mp.                                                                                                  | 33372          |
| 24                                                                 | exp case control studies/                                                                                                  | 1144435        |
| 25                                                                 | exp cohort studies/                                                                                                        | 1909043        |
| 26                                                                 | (observational adj1 stud*).mp.                                                                                             | 180880         |
| 27                                                                 | (cohort adj2 (stud* or analys*)).mp.                                                                                       | 422052         |
| 28                                                                 | (longitudinal or retrospective or prospective or cross sectional).mp.                                                      | 2134729        |
| 29                                                                 | exp Randomized Controlled Trials as Topic/                                                                                 | 145504         |
| 30                                                                 | Non-Randomized Controlled Trials as Topic/                                                                                 | 992            |
| 31                                                                 | RCT.mp.                                                                                                                    | 22108          |
| 32                                                                 | (random* adj3 (control* or trial* or allocat* or assign*)).mp.                                                             | 807527         |
| 33                                                                 | (quasi adj2 (experiment* or trial)).mp.                                                                                    | 12873          |
| 34                                                                 | 20 or 21 or 22 or 23 or 24 or 25 or 26 or 27 or 28 or 29 or 30 or 31 or 33                                                 | 3624692        |
| 35                                                                 | (Animals/ or Models, Animal/ or Disease Models, Animal/) not Humans/                                                       | 2687589        |
| 36                                                                 | 11 and 19 and 34                                                                                                           | 3470           |
| 37                                                                 | 36 not 35                                                                                                                  | 2932           |
| <b>38</b>                                                          | <b>limit 37 to ed=20000101-20211029</b>                                                                                    | <b>2700</b>    |

| Database: Embase (January 1, 2000 – October 29, 2021) |                                                                                                                            |             |
|-------------------------------------------------------|----------------------------------------------------------------------------------------------------------------------------|-------------|
| #                                                     | Searches                                                                                                                   | Results     |
| 1                                                     | Premature Birth/                                                                                                           | 60139       |
| 2                                                     | exp Infant, Premature/                                                                                                     | 111525      |
| 3                                                     | Obstetric Labor, Premature/                                                                                                | 22302       |
| 4                                                     | Prenatal Care/                                                                                                             | 43375       |
| 5                                                     | Term Birth/                                                                                                                | 3888        |
| 6                                                     | exp Infant, Newborn/                                                                                                       | 555990      |
| 7                                                     | exp Pregnancy/                                                                                                             | 702036      |
| 8                                                     | pregnan*.mp.                                                                                                               | 1002592     |
| 9                                                     | ((preterm or pre-term or prematur* or term) adj2 (infant* or birth* or child* or deliver* or labour or labor or born)).mp. | 175491      |
| 10                                                    | lbw.mp.                                                                                                                    | 6063        |
| 11                                                    | 1 or 2 or 3 or 4 or 5 or 6 or 7 or 8 or 9 or 10                                                                            | 1517687     |
| 12                                                    | Glucocorticoids/                                                                                                           | 75879       |
| 13                                                    | (antenatal adj4 (cortico* or steroid*)).mp.                                                                                | 3737        |
| 14                                                    | exp Betamethasone/                                                                                                         | 17845       |
| 15                                                    | exp Dexamethasone/                                                                                                         | 163062      |
| 16                                                    | betamethasone.mp.                                                                                                          | 24708       |
| 17                                                    | celestone.mp.                                                                                                              | 962         |
| 18                                                    | dexamethasone.mp.                                                                                                          | 178533      |
| 19                                                    | 12 or 13 or 14 or 15 or 16 or 17 or 18                                                                                     | 262842      |
| 20                                                    | Prenatal Exposure Delayed Effects/                                                                                         | 25066       |
| 21                                                    | (follow* adj1 up).mp.                                                                                                      | 2276333     |
| 22                                                    | (long* adj1 term).mp.                                                                                                      | 1320222     |
| 23                                                    | (delay* adj2 effect*).mp.                                                                                                  | 12567       |
| 24                                                    | exp case control studies/                                                                                                  | 197427      |
| 25                                                    | exp cohort studies/                                                                                                        | 766607      |
| 26                                                    | (observational adj1 stud*).mp.                                                                                             | 308903      |
| 27                                                    | (cohort adj2 (stud* or analys*)).mp.                                                                                       | 869588      |
| 28                                                    | (longitudinal or retrospective or prospective or cross sectional).mp.                                                      | 3414578     |
| 29                                                    | exp Randomized Controlled Trials as Topic/                                                                                 | 213612      |
| 30                                                    | Non-Randomized Controlled Trials as Topic/                                                                                 | 11980       |
| 31                                                    | RCT.mp.                                                                                                                    | 46393       |
| 32                                                    | (random* adj3 (control* or trial* or allocat* or assign*)).mp.                                                             | 1210857     |
| 33                                                    | (quasi adj2 (experiment* or trial)).mp.                                                                                    | 23038       |
| 34                                                    | 20 or 21 or 22 or 23 or 24 or 25 or 26 or 27 or 28 or 29 or 30 or 31 or 33                                                 | 6404169     |
| 35                                                    | (Animals/ or Models, Animal/ or Disease Models, Animal/) not Humans/                                                       | 2228988     |
| 36                                                    | 11 and 19 and 34                                                                                                           | 6602        |
| 37                                                    | 36 not 35                                                                                                                  | 6307        |
| <b>38</b>                                             | <b>limit 37 to dc=20000101-20211029</b>                                                                                    | <b>5807</b> |

| Database: APA PsychInfo (January 1, 2000 – October 29, 2021) |                                                                                                                            |            |
|--------------------------------------------------------------|----------------------------------------------------------------------------------------------------------------------------|------------|
| #                                                            | Searches                                                                                                                   | Results    |
| 1                                                            | Premature Birth/                                                                                                           | 5964       |
| 2                                                            | Prenatal Care/                                                                                                             | 1986       |
| 3                                                            | exp Pregnancy/                                                                                                             | 44598      |
| 4                                                            | pregnan*.mp.                                                                                                               | 69875      |
| 5                                                            | ((preterm or pre-term or prematur* or term) adj2 (infant* or birth* or child* or deliver* or labour or labor or born)).mp. | 12813      |
| 6                                                            | lbw.mp.                                                                                                                    | 551        |
| 7                                                            | 1 or 2 or 3 or 4 or 5 or 6                                                                                                 | 86353      |
| 8                                                            | Glucocorticoids/                                                                                                           | 3189       |
| 9                                                            | Corticosteroids/                                                                                                           | 1503       |
| 10                                                           | (antenatal adj4 (cortico* or steroid*)).mp.                                                                                | 75         |
| 11                                                           | exp Dexamethasone/                                                                                                         | 1260       |
| 12                                                           | betamethasone.mp.                                                                                                          | 84         |
| 13                                                           | celestone.mp.                                                                                                              | 3          |
| 14                                                           | dexamethasone.mp.                                                                                                          | 4186       |
| 15                                                           | 8 or 9 or 10 or 11 or 12 or 13 or 14                                                                                       | 8079       |
| 16                                                           | Prenatal Exposure/                                                                                                         | 6685       |
| 17                                                           | (follow* adj1 up).mp.                                                                                                      | 135891     |
| 18                                                           | (long* adj1 term).mp.                                                                                                      | 153291     |
| 19                                                           | (delay* adj2 effect*).mp.                                                                                                  | 2643       |
| 20                                                           | exp Cohort Analysis/                                                                                                       | 1555       |
| 21                                                           | (observational adj1 stud*).mp.                                                                                             | 11992      |
| 22                                                           | (cohort adj2 (stud* or analys*)).mp.                                                                                       | 30328      |
| 23                                                           | (longitudinal or retrospective or prospective or cross sectional).mp.                                                      | 296016     |
| 24                                                           | exp Randomized Controlled Trials/                                                                                          | 1041       |
| 25                                                           | (random* adj3 (control* or trial* or allocat* or assign*)).mp.                                                             | 107917     |
| 26                                                           | RCT.mp.                                                                                                                    | 5619       |
| 27                                                           | (quasi adj2 (experiment* or trial)).mp.                                                                                    | 14405      |
| 28                                                           | 16 or 17 or 18 or 19 or 20 or 21 or 22 or 23 or 24 or 25 or 26 or 27                                                       | 630630     |
| 29                                                           | (Animals/ or Models, Animal/ or Disease Models, Animal/) not Humans/                                                       | 7340       |
| 30                                                           | 7 and 15 and 28                                                                                                            | 204        |
| 31                                                           | 30 not 29                                                                                                                  | 204        |
| <b>32</b>                                                    | <b>limit 31 to up=20000101-20210601</b>                                                                                    | <b>198</b> |

| Database: CINAHL (January 1, 2000 – October 29, 2021) |                                                                                                                         |              |
|-------------------------------------------------------|-------------------------------------------------------------------------------------------------------------------------|--------------|
| Numbers                                               | Search terms                                                                                                            | Results      |
| S1                                                    | (MH "Childbirth, Premature")                                                                                            | 11,712       |
| S2                                                    | (MH "Infant, Premature")                                                                                                | 24,452       |
| S3                                                    | (MH "Infant, High Risk")                                                                                                | 598          |
| S4                                                    | (MH "Labor, Premature")                                                                                                 | 3,495        |
| S5                                                    | (MH "Term Birth")                                                                                                       | 1,242        |
| S6                                                    | TX ((preterm or pre-term or prematur* or term) N2 (infant* or birth* or child* or deliver* or labour or labor or born)) | 63,693       |
| S7                                                    | (MH "Infant, Newborn+")                                                                                                 | 146,686      |
| S8                                                    | (MH "Pregnancy+")                                                                                                       | 226,061      |
| S9                                                    | TX (pregnan* or lbw)                                                                                                    | 265,852      |
| S10                                                   | S1 or S2 or S3 or S4 or S5 or S6 or S7 or S8 or S9                                                                      | 389,848      |
| S11                                                   | (MH "Glucocorticoids")                                                                                                  | 9,926        |
| S12                                                   | (MH "Betamethasone")                                                                                                    | 775          |
| S13                                                   | (MH "Dexamethasone")                                                                                                    | 6,087        |
| S14                                                   | TX betamethasone                                                                                                        | 1,131        |
| S15                                                   | TX dexamethasone                                                                                                        | 9,204        |
| S16                                                   | TX (Antenatal* N4 (cortico* or steroid*))                                                                               | 1,214        |
| S17                                                   | TX celestone                                                                                                            | 18           |
| S18                                                   | S11 OR S12 OR S13 OR S14 OR S15 OR S16 OR S17                                                                           | 19,579       |
| S19                                                   | (MH "Prospective Studies+")                                                                                             | 482,102      |
| S20                                                   | (MH "Case Control Studies+")                                                                                            | 88,410       |
| S21                                                   | (MH "Cross Sectional Studies")                                                                                          | 216,413      |
| S22                                                   | TX (cohort N2 (stud* or analys*))                                                                                       | 131,084      |
| S23                                                   | TX (observational N1 stud*)                                                                                             | 61,572       |
| S24                                                   | TX (longitudinal or retrospective or prospective or cross-sectional)                                                    | 1,085,211    |
| S25                                                   | (MH "Randomized Controlled Trials+")                                                                                    | 121,365      |
| S26                                                   | (MH "Clinical Trials+")                                                                                                 | 325,783      |
| S27                                                   | TX (random* N3 (control* or trial* or allocat* or assign*))                                                             | 337,007      |
| S28                                                   | TX (quasi N2 (experiment* or trial))                                                                                    | 20,771       |
| S29                                                   | (MH "Quasi-Experimental Studies")                                                                                       | 14,206       |
| S30                                                   | TX (follow* N1 up)                                                                                                      | 328,428      |
| S31                                                   | TX (long* N1 term)                                                                                                      | 241,394      |
| S32                                                   | TX (delay* N2 effect)                                                                                                   | 8,066        |
| S33                                                   | S18 OR S19 OR S20 OR S21 OR S22 OR S23 OR S24 OR S25 OR S26 OR S27 OR S28 OR S29 OR S30 OR S31 OR S32 OR S32            | 1,784,305    |
| <b>S34</b>                                            | <b>S10 AND S18 AND S33</b>                                                                                              | <b>1,387</b> |

| Database: Web of Science (January 1, 2000 – October 29, 2021) |                                                                                                                              |           |
|---------------------------------------------------------------|------------------------------------------------------------------------------------------------------------------------------|-----------|
| Numbers                                                       | Search terms                                                                                                                 | Results   |
| # 1                                                           | TS=((preterm or pre-term or prematur* or term) NEAR/2 (infant* or birth* or child* or deliver* or labour or labor or born) ) | 150,464   |
| # 2                                                           | TS=pregnan*                                                                                                                  | 545,798   |
| # 3                                                           | #1 or #2                                                                                                                     | 652,997   |
| # 4                                                           | TS=(Antenatal* NEAR/4 (cortico* or steroid* )                                                                                | 2,958     |
| # 5                                                           | TS=betamethasone                                                                                                             | 5,510     |
| # 6                                                           | TS=dexamethasone                                                                                                             | 71,413    |
| # 7                                                           | TS=glucocorticoid*                                                                                                           | 92,135    |
| # 8                                                           | TS=celestone                                                                                                                 | 43        |
| # 9                                                           | #4 or #5 or #6 or #7 or #8                                                                                                   | 153,574   |
| # 10                                                          | TS=(follow* NEAR/1 up)                                                                                                       | 1,175,478 |
| # 11                                                          | TS=(long* NEAR/1 term)                                                                                                       | 1,401,676 |
| # 12                                                          | TS=(delay* NEAR/2 effect)                                                                                                    | 19,232    |
| # 13                                                          | TS=(case control stud*)                                                                                                      | 481,093   |
| # 14                                                          | TS=(cohort NEAR/2 (stud* or analys* )                                                                                        | 320,974   |
| # 15                                                          | TS=(observational NEAR/1 stud*)                                                                                              | 161,898   |
| # 16                                                          | TS=(longitudinal or retrospective or prospective or cross-sectional)                                                         | 2,090,438 |
| # 17                                                          | TS=(random* NEAR/3 (control* or trial* or allocat* or assign* )                                                              | 809,401   |
| # 18                                                          | TS=(quasi NEAR/2 (experiment* or trial) )                                                                                    | 33,714    |
| # 19                                                          | #10 or #11 or #12 or #13 or #14 or #15 or #16 or #17 or #18                                                                  | 5,096,220 |
| # 20                                                          | #3 and #9 and #19                                                                                                            | 2,819     |

| Database: clinicaltrials.gov (January 1, 2000 – October 29, 2021)                                                                                                                                  |         |
|----------------------------------------------------------------------------------------------------------------------------------------------------------------------------------------------------|---------|
| Search terms                                                                                                                                                                                       | Results |
| (preterm OR pre-term OR premature OR prenatal or term) AND (glucocorticoids OR antenatal steroids OR corticosteroid OR betamethasone OR dexamethasone)<br>With applied filter: <b>With Results</b> | 51      |

| Database: Google Scholar (January 1, 2000 – June 1, 2021)                                                                                              |                          |
|--------------------------------------------------------------------------------------------------------------------------------------------------------|--------------------------|
| Search terms                                                                                                                                           | Results                  |
| (preterm OR pre-term OR premature OR prenatal or term) AND (glucocorticoids OR antenatal steroids OR corticosteroid OR betamethasone OR dexamethasone) | <b>First 400 results</b> |

**eAppendix 2.** Excluded Key Articles from a Systematic Review and Meta-analysis of Long-Term Outcomes Associated with Preterm Exposure to Antenatal Corticosteroids

| Reference                                                                                                                                                                                                                                                                                    | Reason(s) for exclusion                                                                             |
|----------------------------------------------------------------------------------------------------------------------------------------------------------------------------------------------------------------------------------------------------------------------------------------------|-----------------------------------------------------------------------------------------------------|
| Asztalos E, Willan A, Murphy K, et al. Association between gestational age at birth, antenatal corticosteroids, and outcomes at 5 years: multiple courses of antenatal corticosteroids for preterm birth study at 5 years of age (MACS-5). <i>BMC Pregnancy Childbirth</i> . 2014;14(1):1-8. | Wrong intervention group (i.e., considers multiple courses of ACS not an unspecified/single course) |
| Asztalos EV, Murphy KE, Hannah ME, et al. Multiple courses of antenatal corticosteroids for preterm birth study: 2-year outcomes. <i>Pediatrics</i> . 2010;126(5):e1045-e1055.                                                                                                               | Wrong intervention group (i.e., considers multiple courses of ACS not an unspecified/single course) |
| Asztalos EV, Murphy KE, Willan AR, et al. Multiple courses of antenatal corticosteroids for preterm birth study: outcomes in children at 5 years of age (MACS-5). <i>JAMA Pediatr</i> . 2013;167(12):1102-1110.                                                                              | Wrong intervention group (i.e., considers multiple courses of ACS not an unspecified/single course) |
| Vanda R. Comparison of the effect of corticosteroid therapy and pre-natal single-period treatment on birth size and neuronal development in preterm infants with one year follow up in Yasuj hospitals in 2015-2017. <i>Rev Latinoam de Hipertens</i> . 2018;13(6):567-572.                  | Wrong intervention group (i.e., considers multiple courses of ACS not an unspecified/single course) |
| Kiran PS, Dutta S, Narang A, Bhansali A, Malhi P. Multiple courses of antenatal steroids. <i>Indian J Pediatr</i> . 2007;74(5):463-469.                                                                                                                                                      | Wrong intervention group (i.e., considers multiple courses of ACS not an unspecified/single course) |
| Peltoniemi OM, Kari MA, Lano A, et al. Two-year follow-up of a randomised trial with repeated antenatal betamethasone. <i>Arch Dis Child Fetal Neonatal Ed</i> . 2009;94(6):F402-F406.                                                                                                       | Wrong intervention group (i.e., considers multiple courses of ACS not an unspecified/single course) |
| Wapner RJ, Sorokin Y, Mele L, et al. Long-term outcomes after repeat doses of antenatal corticosteroids. <i>N Engl J Med</i> . 2007;357(12):1190-1198.                                                                                                                                       | Wrong intervention group (i.e., considers multiple courses of ACS not an unspecified/single course) |
| Pesonen A-K, Räikkönen K, Lano A, Peltoniemi O, Hallman M, Kari MA. Antenatal betamethasone and fetal growth in prematurely born children: implications for temperament traits at the age of 2 years. <i>Pediatrics</i> . 2009;123(1):e31-e37.                                               | Wrong intervention group (i.e., considers multiple courses of ACS not an unspecified/single course) |
| Battarbee AN, Ros ST, Esplin MS, et al. Optimal timing of antenatal corticosteroid administration and preterm neonatal and early childhood outcomes. <i>Am J Obstet Gynecol</i> . 2020;2(1)100077.                                                                                           | Wrong comparator group (i.e., does not include children who were not exposed to ACS).               |
| Ramos-Navarro C, Sánchez-Luna M, Zeballos-Sarrato S, Pescador-Chamorro I. Antenatal corticosteroids and the influence of sex on morbidity and mortality of preterm infants. <i>J Matern Fetal Neonatal Med</i> . 2020:1-8.                                                                   | Wrong comparator group (i.e., does not include children who were not exposed to ACS).               |
| Supriya, Singh SN, Tripathi S, Kumar M. Outcome of preterm neonates born to women of a developing country at risk of preterm birth exposed to varying doses of antenatal corticosteroid: A prospective observational study. <i>Clin Epidemiol Glob Health</i> . 2020;8(2):623-627.           | Wrong comparator group (i.e., does not include children who were not exposed to ACS).               |
| Crowther CA, Ashwood P, Andersen CC, et al. Maternal intramuscular dexamethasone versus betamethasone before preterm birth (ASTEROID): a multicentre, double-blind, randomised controlled trial. Article. <i>Lancet Child Adolesc Health</i> . 2019;3(11):769-780.                           | Wrong comparator group (i.e., does not include children who were not exposed to ACS).               |
| McEvoy C, Schilling D, Spitale P, O'Malley J, Bowling S, Durand M. Pulmonary function and outcomes in infants randomized to a rescue course of antenatal steroids. <i>Pediatr Pulmonol</i> . 2017;52(9):1171-1178.                                                                           | Wrong comparator group (i.e., does not include children who were not exposed to ACS).               |
| Delmas O, Garcia P, Bernard V, et al. [Neurodevelopmental outcome at 3 years of age of infants born at less than 26 weeks. <i>Arch Pediatr</i> . 2016;23(9):927-34.                                                                                                                          | Wrong comparator group (i.e., does not include children who were not exposed to ACS).               |



|                                                                                                                                                                                                                                                                                                                                |                                                                                       |
|--------------------------------------------------------------------------------------------------------------------------------------------------------------------------------------------------------------------------------------------------------------------------------------------------------------------------------|---------------------------------------------------------------------------------------|
| Rogers CE, Smyser T, Smyser CD, Shimony J, Inder TE, Neil JJ. Regional white matter development in very preterm infants: perinatal predictors and early developmental outcomes. <i>Pediatr Res</i> . 2016;79(1):87-95.                                                                                                         | Wrong comparator group (i.e., does not include children who were not exposed to ACS). |
| Backes CH, Rivera BK, Haque U, et al. A Proactive Approach to Neonates Born at 23 Weeks of Gestation. <i>Obstet Gynecol</i> . 2015;126(5):939-946.                                                                                                                                                                             | Wrong comparator group (i.e., does not include children who were not exposed to ACS). |
| Purdy IB, Smith L, Wiley D, Badr L. A Psychoneuroimmunologic Examination of Cumulative Perinatal Steroid Exposures and Preterm Infant Behavioral Follow-Up. <i>Biological Research for Nursing</i> . 2013;15(1):86-95.                                                                                                         | Wrong comparator group (i.e., does not include children who were not exposed to ACS). |
| Liu J, Feng ZC, Li J, Wang Q. Antenatal dexamethasone has no adverse effects on child physical and cognitive development: a long-term cohort follow-up investigation. <i>J Matern Fetal Neonatal Med</i> . 2012;25(11):2369-2371.                                                                                              | Wrong comparator group (i.e., does not include children who were not exposed to ACS). |
| Schlapbach LJ, Adams M, Proietti E, et al. Outcome at two years of age in a Swiss national cohort of extremely preterm infants born between 2000 and 2008. <i>BMC Pediatr</i> . 2012;12:198.                                                                                                                                   | Wrong comparator group (i.e., does not include children who were not exposed to ACS). |
| Davidson C, Monga M, Ellison D, Vidaeff A. Continuation of pregnancy after antenatal corticosteroid administration: opportunity for rescue? <i>J Reprod Med</i> . 2010;55(1):14-18.                                                                                                                                            | Wrong comparator group (i.e., does not include children who were not exposed to ACS). |
| Ilg L, Kirschbaum C, Li S-C, et al. No Association of Antenatal Synthetic Glucocorticoid Exposure and Hair Steroid Levels in Children and Adolescents. <i>J Clin Endocrinol Metab</i> . 2020;105(3):e575-e582.                                                                                                                 | Wrong population (i.e., includes births occurring prior to the year 2000)             |
| Cartwright RD, Crowther CA, Anderson PJ, Harding JE, Doyle LW, McKinlay CJD. Association of Fetal Growth Restriction With Neurocognitive Function After Repeated Antenatal Betamethasone Treatment vs Placebo: Secondary Analysis of the ACTORDS Randomized Clinical Trial. <i>JAMA Netw Open</i> . 2019;2(2):e187636-e187636. | Wrong population (i.e., includes births occurring prior to the year 2000)             |
| Ilg L, Kirschbaum C, Li S-C, Rosenlöcher F, Miller R, Alexander N. Persistent Effects of Antenatal Synthetic Glucocorticoids on Endocrine Stress Reactivity From Childhood to Adolescence. <i>J Clin Endocrinol Metab</i> . 2018;104(3):827-834.                                                                               | Wrong population (i.e., includes births occurring prior to the year 2000)             |
| Nixon PA, Shaltout HA, South AM, et al. Antenatal Steroid Exposure, Aerobic Fitness, and Physical Activity in Adolescents Born Preterm with Very Low Birth Weight. <i>J Pediatr</i> . 2019;215:98-98.                                                                                                                          | Wrong population (i.e., includes births occurring prior to the year 2000)             |
| Savoy C, Mathewson KJ, Schmidt LA, et al. Exposure to antenatal corticosteroids and reduced respiratory sinus arrhythmia in adult survivors of extremely low birth weight. <i>Int J Neurosci</i> . 2019;129(8):776-783.                                                                                                        | Wrong population (i.e., includes births occurring prior to the year 2000)             |
| Cartwright RD, Harding JE, Crowther CA, et al. Repeat antenatal betamethasone and cardiometabolic outcomes. <i>Pediatrics</i> . 2018;142(1)e20180522.                                                                                                                                                                          | Wrong population (i.e., includes births occurring prior to the year 2000)             |
| Ilg L, Klados M, Alexander N, Kirschbaum C, Li SC. Long-term impacts of prenatal synthetic glucocorticoids exposure on functional brain correlates of cognitive monitoring in adolescence. <i>Sci Rep</i> . 2018;8(1):7715.                                                                                                    | Wrong population (i.e., includes births occurring prior to the year 2000)             |
| Krzeczkowski JE, Schmidt LA, Savoy C, Saigal S, Van Lieshout RJ. Frontal EEG asymmetry in extremely low birth weight adult survivors: Links to antenatal corticosteroid exposure and psychopathology. <i>Clin Neurophysiol</i> . 2018;129(9):1891-1898.                                                                        | Wrong population (i.e., includes births occurring prior to the year 2000)             |
| McKinlay CJD, Cutfield WS, Battin MR, Dalziel SR, Crowther CA, Harding JE. Mid-Childhood Bone Mass After Exposure to Repeat Doses of Antenatal Glucocorticoids: A Randomized Trial. <i>Pediatrics</i> . 2017;139(5):1-9.                                                                                                       | Wrong population (i.e., includes births occurring prior to the year 2000)             |
| Nixon PA, Washburn LK, Michael O'Shea T, et al. Antenatal steroid exposure and heart rate variability in adolescents born with very low birth weight. <i>Pediatr Res</i> . 2017;81(1-1):57-62. doi: <a href="https://dx.doi.org/10.1038/pr.2016.173">https://dx.doi.org/10.1038/pr.2016.173</a>                                | Wrong population (i.e., includes births occurring prior to the year 2000)             |

|                                                                                                                                                                                                                                                                                                       |                                                                           |
|-------------------------------------------------------------------------------------------------------------------------------------------------------------------------------------------------------------------------------------------------------------------------------------------------------|---------------------------------------------------------------------------|
| South AM, Nixon PA, Chappell MC, et al. Antenatal corticosteroids and the renin-angiotensin-aldosterone system in adolescents born preterm. <i>Pediatr Res.</i> 2017;81(1):88-93.                                                                                                                     | Wrong population (i.e., includes births occurring prior to the year 2000) |
| Washburn LK, Nixon PA, Snively BM, et al. Antenatal corticosteroids and cardiometabolic outcomes in adolescents born with very low birth weight. <i>Pediatr Res.</i> 2017;82(4):697-703.                                                                                                              | Wrong population (i.e., includes births occurring prior to the year 2000) |
| Alexander N, Rosenlöcher F, Dettenborn L, et al. Impact of Antenatal Glucocorticoid Therapy and Risk of Preterm Delivery on Intelligence in Term-Born Children. <i>J Clin Endocrinol Metab.</i> 2016;101(2):581-589.                                                                                  | Wrong population (i.e., includes births occurring prior to the year 2000) |
| Boghossian NS, McDonald SA, Bell EF, et al. Association of Antenatal Corticosteroids With Mortality, Morbidity, and Neurodevelopmental Outcomes in Extremely Preterm Multiple Gestation Infants. <i>JAMA Pediatr.</i> 2016;170(6):593-601.                                                            | Wrong population (i.e., includes births occurring prior to the year 2000) |
| Crowther CA, Anderson PJ, McKinlay CJ, et al. Mid-childhood outcomes of repeat antenatal corticosteroids: A randomized controlled trial. <i>Pediatrics.</i> 2016;138(4):1-10.                                                                                                                         | Wrong population (i.e., includes births occurring prior to the year 2000) |
| Edelmann M, Sandman CA, Glynn LM, Wing D, Davis EP. Antenatal glucocorticoid treatment is associated with diurnal cortisol regulation in term-born children. <i>Psychoneuroendocrinology.</i> 2016;72:106-112.                                                                                        | Wrong population (i.e., includes births occurring prior to the year 2000) |
| Morrison KM, Ramsingh L, Gunn E, et al. Cardiometabolic Health in Adults Born Premature With Extremely Low Birth Weight. <i>Pediatrics.</i> 2016;138(4):1-9.                                                                                                                                          | Wrong population (i.e., includes births occurring prior to the year 2000) |
| Savoy C, Ferro MA, Schmidt LA, Saigal S, Van Lieshout RJ. Prenatal betamethasone exposure and psychopathology risk in extremely low birth weight survivors in the third and fourth decades of life. <i>Psychoneuroendocrinology.</i> 2016;74:278-285.                                                 | Wrong population (i.e., includes births occurring prior to the year 2000) |
| Tapia IE, Shults J, Doyle LW, et al. Perinatal risk factors associated with the obstructive sleep apnea syndrome in school-aged children born preterm. <i>Sleep.</i> 2016;39(4):737-742.                                                                                                              | Wrong population (i.e., includes births occurring prior to the year 2000) |
| Hirata K, Nishihara M, Shiraishi J, et al. Perinatal factors associated with long-term respiratory sequelae in extremely low birthweight infants. <i>Arch Dis Child Fetal Neonatal Ed.</i> 2015;100(4):F314-9.                                                                                        | Wrong population (i.e., includes births occurring prior to the year 2000) |
| McKinlay CJ, Cutfield WS, Battin MR, et al. Cardiovascular risk factors in children after repeat doses of antenatal glucocorticoids: an RCT. <i>Pediatrics.</i> 2015;135(2):e405-415.                                                                                                                 | Wrong population (i.e., includes births occurring prior to the year 2000) |
| Miltaha HR, Fahey LM, Sajous CH, Morrison JC, Muraskas JK. Influence of Perinatal Factors in Short- and Long-Term Outcomes of Infants Born at 23 Weeks of Gestation. <i>Am J Perinatol.</i> 2015;32(7):627-632.                                                                                       | Wrong population (i.e., includes births occurring prior to the year 2000) |
| van der Voorn B, Wit JM, van der Pal SM, Rotteveel J, Finken MJ. Antenatal glucocorticoid treatment and polymorphisms of the glucocorticoid and mineralocorticoid receptors are associated with IQ and behavior in young adults born very preterm. <i>J Clin Endocrinol Metab.</i> 2015;100(2):500-7. | Wrong population (i.e., includes births occurring prior to the year 2000) |
| Van Lieshout RJ, Boyle MH, Saigal S, Morrison K, Schmidt LA. Mental Health of Extremely Low Birth Weight Survivors in Their 30s. <i>Pediatrics.</i> 2015;135(3):452-459.                                                                                                                              | Wrong population (i.e., includes births occurring prior to the year 2000) |
| Voilsaeter M, Skromme K, Satrell E, et al. Children Born Preterm at the Turn of the Millennium Had Better Lung Function Than Children Born Similarly Preterm in the Early 1990s. <i>PLoS ONE.</i> 2015;10(12):e0144243.                                                                               | Wrong population (i.e., includes births occurring prior to the year 2000) |
| Wong D, Abdel-Latif M, Kent A. Antenatal steroid exposure and outcomes of very premature infants: a regional cohort study. <i>Arch Dis Child Fetal Neonatal Ed.</i> 2014;99(1):F12-20.                                                                                                                | Wrong population (i.e., includes births occurring prior to the year 2000) |

|                                                                                                                                                                                                                                                                                         |                                                                           |
|-----------------------------------------------------------------------------------------------------------------------------------------------------------------------------------------------------------------------------------------------------------------------------------------|---------------------------------------------------------------------------|
| Choukroun ML, Feghali H, Vautrat S, et al. Pulmonary outcome and its correlates in school-aged children born with a gestational age <= 32 weeks. Research Support, Non-U.S. Gov't. <i>Respir Med.</i> 2013;107(12):1966-76.                                                             | Wrong population (i.e., includes births occurring prior to the year 2000) |
| Davis EP, Sandman CA, Buss C, Wing DA, Head K. Fetal glucocorticoid exposure is associated with preadolescent brain development. <i>Biol Psychiatry.</i> 2013;74(9):647-655.                                                                                                            | Wrong population (i.e., includes births occurring prior to the year 2000) |
| Greene NH, Pedersen LH, Liu SM, Olsen J. Prenatal prescription corticosteroids and offspring diabetes: A national cohort study. Article. <i>Int J Epidemiol.</i> 2013;42(1):186-193.                                                                                                    | Wrong population (i.e., includes births occurring prior to the year 2000) |
| Khalife N, Glover V, Taanila A, Ebeling H, Jarvelin MR, Rodriguez A. Prenatal glucocorticoid treatment and later mental health in children and adolescents. <i>PLoS ONE.</i> 2013;8(11)e81394.                                                                                          | Wrong population (i.e., includes births occurring prior to the year 2000) |
| Kumar P, Shankaran S, Ambalavanan N, et al. Characteristics of extremely low-birth-weight infant survivors with unimpaired outcomes at 30 months of age. <i>J Perinatol.</i> 2013;33(10):800-805.                                                                                       | Wrong population (i.e., includes births occurring prior to the year 2000) |
| Nixon PA, Washburn LK, O'Shea TM. Antenatal steroid exposure and pulmonary outcomes in adolescents born with very low birth weight. <i>J Perinatol.</i> 2013;33(10):806-810.                                                                                                            | Wrong population (i.e., includes births occurring prior to the year 2000) |
| Norberg H, Stålnacke J, Nordenström A, Norman M. Repeat antenatal steroid exposure and later blood pressure, arterial stiffness, and metabolic profile. <i>J Pediatr.</i> 2013;163(3):711-716.                                                                                          | Wrong population (i.e., includes births occurring prior to the year 2000) |
| Stålnacke J, Diaz Heijtz R, Norberg H, Norman M, Smedler A-C, Forsberg H. Cognitive outcome in adolescents and young adults after repeat courses of antenatal corticosteroids. <i>J Pediatr.</i> 2013;163(2):441-446.                                                                   | Wrong population (i.e., includes births occurring prior to the year 2000) |
| Stutchfield PR, Whitaker R, Gliddon AE, Hobson L, Kotecha S, Doull IJ. Behavioural, educational and respiratory outcomes of antenatal betamethasone for term caesarean section (ASTECS trial). <i>Arch Dis Child Fetal Neonatal Ed.</i> 2013;98(3):F195-F200.                           | Wrong population (i.e., includes births occurring prior to the year 2000) |
| Wadhawan R, Oh W, Vohr BR, et al. Spontaneous intestinal perforation in extremely low birth weight infants: association with indometacin therapy and effects on neurodevelopmental outcomes at 18-22 months corrected age. <i>Arch Dis Child Fetal Neonatal Ed.</i> 2013;98(2):F127-32. | Wrong population (i.e., includes births occurring prior to the year 2000) |
| Alexander N, Rosenlocher F, Stalder T, et al. Impact of antenatal synthetic glucocorticoid exposure on endocrine stress reactivity in term-born children. <i>J Clin Endocrinol Metab.</i> 2012;97(10):3538-3544.                                                                        | Wrong population (i.e., includes births occurring prior to the year 2000) |
| Bensley JG, De Matteo R, Harding R, Black MJ. Preterm birth with antenatal corticosteroid administration has injurious and persistent effects on the structure and composition of the aorta and pulmonary artery. <i>Pediatr Res.</i> 2012;71(2):150-155.                               | Wrong population (i.e., includes births occurring prior to the year 2000) |
| Eriksson L, Haglund B, Ewald U, Odling V, Kieler H. Health consequences of prophylactic exposure to antenatal corticosteroids among children born late preterm or term. <i>Acta Obstet Gynecol Scand.</i> 2012;91(12):1415-1421.                                                        | Wrong population (i.e., includes births occurring prior to the year 2000) |
| Kelly BA, Lewandowski AJ, Worton SA, et al. Antenatal glucocorticoid exposure and long-term alterations in aortic function and glucose metabolism. <i>Pediatrics.</i> 2012;129(5):e1282-e1290.                                                                                          | Wrong population (i.e., includes births occurring prior to the year 2000) |
| Shah PS, Sankaran K, Aziz K, et al. Outcomes of preterm infants <29 weeks gestation over 10-year period in Canada: a cause for concern? <i>J Perinatol.</i> 2012;32(2):132-8.                                                                                                           | Wrong population (i.e., includes births occurring prior to the year 2000) |
| Bajwa NM, Berner M, Worley S, Pfister RE, Swiss Neonatal N. Population based age stratified morbidities of premature infants in Switzerland. <i>Swiss Med Wkly.</i> 2011;141:w13212.                                                                                                    | Wrong population (i.e., includes births occurring prior to the year 2000) |

|                                                                                                                                                                                                                                                                             |                                                                           |
|-----------------------------------------------------------------------------------------------------------------------------------------------------------------------------------------------------------------------------------------------------------------------------|---------------------------------------------------------------------------|
| Carballo-Magdaleno D, Guízar-Mendoza J, Amador-Licona N, Domínguez-Domínguez V. Renal function, renal volume, and blood pressure in infants with antecedent of antenatal steroids. <i>Pediatr Nephrol.</i> 2011;26(10):1851-1856.                                           | Wrong population (i.e., includes births occurring prior to the year 2000) |
| Carlo WA, McDonald SA, Fanaroff AA, et al. Association of antenatal corticosteroids with mortality and neurodevelopmental outcomes among infants born at 22 to 25 weeks' gestation. <i>JAMA.</i> 2011;306(21):2348-2358.                                                    | Wrong population (i.e., includes births occurring prior to the year 2000) |
| Korakaki E, Damilakis J, Gourgiotis D, et al. Quantitative ultrasound measurements in premature infants at 1 year of age: the effects of antenatal administered corticosteroids. <i>Calcif Tissue Int.</i> 2011;88(3):215-222.                                              | Wrong population (i.e., includes births occurring prior to the year 2000) |
| McKinlay CJD, Cutfield WS, Battin MR, Dalziel SR, Crowther CA. Cardiovascular risk factors after exposure to repeat antenatal betamethasone: Early schoolage follow-up of a randomised trial (ACTORDS). <i>J Paediatr Child Health.</i> 2011;47(1):20.                      | Wrong population (i.e., includes births occurring prior to the year 2000) |
| McKinlay CJD, Cutfield WS, Battin MR, Dalziel SR, Crowther CA. Repeat antenatal betamethasone does not affect basal salivary cortisol at early school-age: A randomised controlled trial (actords). <i>J Paediatr Child Health.</i> 2011;47(1):19.                          | Wrong population (i.e., includes births occurring prior to the year 2000) |
| Pierrat V, Marchand-Martin L, Guemas I, et al. Height at 2 and 5 years of age in children born very preterm: the EPIPAGE study. <i>Arch Dis Child Fetal Neonatal Ed.</i> 2011;96(5):F348-54.                                                                                | Wrong population (i.e., includes births occurring prior to the year 2000) |
| Locatelli A, Ghidini A, Incerti M, et al. Gestational age at glucocorticoids administration after premature rupture of membranes and cerebral white matter damage. <i>J Matern Fetal Neonatal Med.</i> 2010;23(6):511-515.                                                  | Wrong population (i.e., includes births occurring prior to the year 2000) |
| Meuwese CL, Euser AM, Ballieux BE, et al. Growth-restricted preterm newborns are predisposed to functional adrenal hyperandrogenism in adult life. <i>Eur J Endocrinol.</i> 2010;163(4):681-9.                                                                              | Wrong population (i.e., includes births occurring prior to the year 2000) |
| Pole JD, Mustard CA, To T, Beyene J, Allen AC. Antenatal steroid therapy for fetal lung maturation and the subsequent risk of childhood asthma: a longitudinal analysis. <i>J Pregnancy.</i> 2010;2010:789748.                                                              | Wrong population (i.e., includes births occurring prior to the year 2000) |
| Eriksson L, Haglund B, Ewald U, Odland V, Kieler H. Short and long-term effects of antenatal corticosteroids assessed in a cohort of 7,827 children born preterm. <i>Acta Obstet Gynecol Scand.</i> 2009;88(8):933-938.                                                     | Wrong population (i.e., includes births occurring prior to the year 2000) |
| Fellman V, Hellström-Westas L, Norman M, et al. One-year survival of extremely preterm infants after active perinatal care in Sweden. <i>JAMA.</i> 2009;301(21):2225-2233.                                                                                                  | Wrong population (i.e., includes births occurring prior to the year 2000) |
| Luu TM, Ment LR, Schneider KC, Katz KH, Allan WC, Vohr BR. Lasting effects of preterm birth and neonatal brain hemorrhage at 12 years of age. <i>Pediatrics.</i> 2009;123(3):1037-1044.                                                                                     | Wrong population (i.e., includes births occurring prior to the year 2000) |
| Pole J, Mustard C, To T, Beyene J, Allen A. Antenatal Steroid Therapy for Fetal Lung Maturation: Is There an Association with Childhood Asthma? <i>J Asthma.</i> 2009;46(1):47-52.                                                                                          | Wrong population (i.e., includes births occurring prior to the year 2000) |
| Chen XK, Loughheed J, Lawson ML, et al. Effects of repeated courses of antenatal corticosteroids on somatic development in children 6 to 10 years of age. <i>Am J Perinatol.</i> 2008;25(1):21-28.                                                                          | Wrong population (i.e., includes births occurring prior to the year 2000) |
| de Vries WB, Karemaker R, Mooy NF, et al. Cardiovascular follow-up at school age after perinatal glucocorticoid exposure in prematurely born children: perinatal glucocorticoid therapy and cardiovascular follow-up. <i>Arch Pediatr Adolesc Med.</i> 2008;162(8):738-744. | Wrong population (i.e., includes births occurring prior to the year 2000) |
| Finken MJ, Keijzer-Veen MG, Dekker FW, et al. Antenatal glucocorticoid treatment is not associated with long-term metabolic risks in individuals born                                                                                                                       | Wrong population (i.e., includes births occurring prior to the year 2000) |

|                                                                                                                                                                                                                                                            |                                                                           |
|------------------------------------------------------------------------------------------------------------------------------------------------------------------------------------------------------------------------------------------------------------|---------------------------------------------------------------------------|
| before 32 weeks of gestation. <i>Arch Dis Child Fetal Neonatal Ed.</i> 2008;93(6):F442-7.                                                                                                                                                                  |                                                                           |
| Foix-L'Heliass L, Marchand L, Theret B, et al. Impact of the use of antenatal corticosteroids on mortality, cerebral lesions and 5-year neurodevelopmental outcomes of very preterm infants: The EPIPAGE cohort study. <i>BJOG.</i> 2008;115(2):275-282.   | Wrong population (i.e., includes births occurring prior to the year 2000) |
| Purdy IB, Wiley DJ, Smith LM, et al. Cumulative perinatal steroids: child development of preterm infants. <i>J Pediatr Nurs.</i> 2008;23(3):201-214.                                                                                                       | Wrong population (i.e., includes births occurring prior to the year 2000) |
| Robinson M, Oddy WH, Li JH, et al. Pre- and postnatal influences on preschool mental health: a large-scale cohort study. <i>J Child Psychol Psychiatry.</i> 2008;49(10):1118-1128.                                                                         | Wrong population (i.e., includes births occurring prior to the year 2000) |
| Skrablin S, Maurac I, Banovic V, Bosnjak-Nadj K. Perinatal factors associated with the neurologic impairment of children born preterm. <i>Int J Gynaecol Obstet.</i> 2008;102(1):12-18.                                                                    | Wrong population (i.e., includes births occurring prior to the year 2000) |
| Battin MR, Bevan C, Harding JE. Repeat doses of antenatal steroids and hypothalamic-pituitary-adrenal axis (HPA) function. <i>Am J Obstet Gynecol.</i> 2007;197(1):40.e1-6.                                                                                | Wrong population (i.e., includes births occurring prior to the year 2000) |
| Crowther CA, Doyle LW, Haslam RR, Hiller JE, Harding JE, Robinson JS. Outcomes at 2 years of age after repeat doses of antenatal corticosteroids. <i>NEJM.</i> 2007;357(12):1179-1189.                                                                     | Wrong population (i.e., includes births occurring prior to the year 2000) |
| Dalziel SR, Lim VK, Lambert A, et al. Psychological functioning and health-related quality of life in adulthood after preterm birth. <i>Dev Med Child Neurol.</i> 2007;49(8):597-602.                                                                      | Wrong population (i.e., includes births occurring prior to the year 2000) |
| Dalziel SR, Parag V, Rodgers A, Harding JE. Cardiovascular risk factors at age 30 following pre-term birth. <i>Int J Epidemiol.</i> 2007;36(4):907-915.                                                                                                    | Wrong population (i.e., includes births occurring prior to the year 2000) |
| Ashwood PJ, Crowther CA, Willson KJ, et al. Neonatal adrenal function after repeat dose prenatal corticosteroids: a randomized controlled trial. <i>Am J Obstet Gynecol.</i> 2006;194(3):861-7.                                                            | Wrong population (i.e., includes births occurring prior to the year 2000) |
| Dalziel SR, Fenwick S, Cundy T, et al. Peak bone mass after exposure to antenatal betamethasone and prematurity: follow-up of a randomized controlled trial. <i>J Bone Miner Res.</i> 2006;21(8):1175-1186.                                                | Wrong population (i.e., includes births occurring prior to the year 2000) |
| Dalziel SR, Rea HH, Walker NK, et al. Long term effects of antenatal betamethasone on lung function: 30 Year follow up of a randomised controlled trial. <i>Thorax.</i> 2006;61(8):678-683.                                                                | Wrong population (i.e., includes births occurring prior to the year 2000) |
| Vincer MJ, Allen AC, Joseph KS, Stinson DA, Scott H, Wood E. Increasing prevalence of cerebral palsy among very preterm infants: a population-based study. <i>Pediatrics.</i> 2006;118(6):e1621-6.                                                         | Wrong population (i.e., includes births occurring prior to the year 2000) |
| Dalziel SR, Lim VK, Lambert A, et al. Antenatal exposure to betamethasone: psychological functioning and health related quality of life 31 years after inclusion in randomised controlled trial. <i>BMJ.</i> 2005;331(7518):665-668.                       | Wrong population (i.e., includes births occurring prior to the year 2000) |
| Dalziel SR, Walker NK, Parag V, et al. Cardiovascular risk factors after antenatal exposure to betamethasone: 30-year follow-up of a randomised controlled trial. Article. <i>Lancet.</i> 2005;365(9474):1856-1862.                                        | Wrong population (i.e., includes births occurring prior to the year 2000) |
| Kent A, Lomas F, Hurrion E, Dahlstrom JE. Antenatal steroids may reduce adverse neurological outcome following chorioamnionitis: neurodevelopmental outcome and chorioamnionitis in premature infants. <i>J Paediatr Child Health.</i> 2005;41(4):186-190. | Wrong population (i.e., includes births occurring prior to the year 2000) |
| Tran U, Gray PH, O'Callaghan MJ. Neonatal antecedents for cerebral palsy in extremely preterm babies and interaction with maternal factors. <i>Early Hum Dev.</i> 2005;81(6):555-561.                                                                      | Wrong population (i.e., includes births occurring prior to the year 2000) |

|                                                                                                                                                                                                                                                                    |                                                                           |
|--------------------------------------------------------------------------------------------------------------------------------------------------------------------------------------------------------------------------------------------------------------------|---------------------------------------------------------------------------|
| Vohr BR, Wright LL, Poole WK, McDonald SA. Neurodevelopmental outcomes of extremely low birth weight infants <32 weeks' gestation between 1993 and 1998. <i>Pediatrics</i> . 2005;116(3):635-643.                                                                  | Wrong population (i.e., includes births occurring prior to the year 2000) |
| Wood NS, Costeloe K, Gibson AT, et al. The EPICure study: associations and antecedents of neurological and developmental disability at 30 months of age following extremely preterm birth. <i>Arch Dis Child Fetal Neonatal Ed</i> . 2005;90(2):F134-40.           | Wrong population (i.e., includes births occurring prior to the year 2000) |
| D'Amore A, Ahluwalia J, Cheema I, Prentice A, Kaptoge S, Kelsall W. The Effect of Antenatal Corticosteroids on Fetal Growth, Survival, and Neurodevelopmental Outcome in Triplet Pregnancies. <i>Am J Perinatol</i> . 2004;21(1):1-8.                              | Wrong population (i.e., includes births occurring prior to the year 2000) |
| Dalziel SR, Liang A, Parag V, Rodgers A, Harding JE. Blood pressure at 6 years of age after prenatal exposure to betamethasone: follow-up results of a randomized, controlled trial. <i>Pediatrics</i> . 2004;114(3):e373-7.                                       | Wrong population (i.e., includes births occurring prior to the year 2000) |
| French NP, Hagan R, Evans SF, Mullan A, Newnham JP. Repeated antenatal corticosteroids: Effects on cerebral palsy and childhood behavior. <i>Am J Obstet Gynecol</i> . 2004;190(3):588-595.                                                                        | Wrong population (i.e., includes births occurring prior to the year 2000) |
| Kumar P, Seshadri R, Grobman WA. Neurodevelopmental outcome of very low birth weight infants after multiple courses of antenatal corticosteroids. <i>J Soc Gynecol Investig</i> . 2004;11(7):483-487.                                                              | Wrong population (i.e., includes births occurring prior to the year 2000) |
| Spinillo A, Viazzo F, Colleoni R, Chiara A, Cerbo RM, Fazzi E. Two-year infant neurodevelopmental outcome after single or multiple antenatal courses of corticosteroids to prevent complications of prematurity. <i>Am J Obstet Gynecol</i> . 2004;191(1):217-224. | Wrong population (i.e., includes births occurring prior to the year 2000) |
| Stoelhorst GM, Rijken M, Martens SE, et al. Developmental outcome at 18 and 24 months of age in very preterm children: A cohort study from 1996-1997. <i>Early Hum Dev</i> . 2003;72(2):83-95.                                                                     | Wrong population (i.e., includes births occurring prior to the year 2000) |
| Stoelhorst G, Martens SE, Rijken M, et al. Behaviour at 2 years of age in very preterm infants (gestational age < 32 weeks). <i>Acta Paediatrica</i> . 2003;92(5):595-601.                                                                                         | Wrong population (i.e., includes births occurring prior to the year 2000) |
| Thorp JA, O'Connor M, Belden B, Etzenhouser J, Hoffman EL, Jones PG. Effects of phenobarbital and multiple-dose corticosteroids on developmental outcome at age 7 years. <i>Obstet Gynecol</i> . 2003;101(2):363-373.                                              | Wrong population (i.e., includes births occurring prior to the year 2000) |
| Arad I, Durkin MS, Hinton VJ, et al. Long-term cognitive benefits of antenatal corticosteroids for prematurely born children with cranial ultrasound abnormalities. <i>Am J Obstet Gynecol</i> . 2002;186(4):818-825.                                              | Wrong population (i.e., includes births occurring prior to the year 2000) |
| LeFlore JL, Salhab WA, Broyles RS, Engle WD. Association of antenatal and postnatal dexamethasone exposure with outcomes in extremely low birth weight neonates. <i>Pediatrics</i> . 2002;110(2):275-279.                                                          | Wrong population (i.e., includes births occurring prior to the year 2000) |
| Gaillard EA, Cooke RW, Shaw NJ. Improved survival and neurodevelopmental outcome after prolonged ventilation in preterm neonates who have received antenatal steroids and surfactant. <i>Arch Dis Child Fetal Neonatal Ed</i> . 2001;84(3):F194-6.                 | Wrong population (i.e., includes births occurring prior to the year 2000) |
| Hasbargen U, Reber D, Versmold H, Schulze A. Growth and development of children to 4 years of age after repeated antenatal steroid administration. <i>European J Pediatr</i> . 2001;160(9):552-5.                                                                  | Wrong population (i.e., includes births occurring prior to the year 2000) |
| Palta M, Sadek-Badawi M, Sheehy M, et al. Respiratory symptoms at age 8 years in a cohort of very low birth weight children. Research Support, U.S. Gov't, P.H.S. <i>Am J Epidemiol</i> . 2001;154(6):521-9.                                                       | Wrong population (i.e., includes births occurring prior to the year 2000) |
| Schaap AH, Wolf H, Bruinse HW, De Haas HS, Van Ertbruggen I, Treffers PE. Effects of antenatal corticosteroid administration on mortality and long-term                                                                                                            | Wrong population (i.e., includes births occurring prior to the year 2000) |

|                                                                                                                                                                                                                       |                                                                           |
|-----------------------------------------------------------------------------------------------------------------------------------------------------------------------------------------------------------------------|---------------------------------------------------------------------------|
| morbidity in early preterm, growth-restricted infants. <i>Obstet Gynecol.</i> 2001;97(6):954-960.                                                                                                                     |                                                                           |
| Dessens AB, Haas HS, Koppe JG. Twenty-year follow-up of antenatal corticosteroid treatment. <i>Pediatrics.</i> 2000;105(6):E77.                                                                                       | Wrong population (i.e., includes births occurring prior to the year 2000) |
| Doyle LW, Ford GW, Davis NM, Callanan C. Antenatal corticosteroid therapy and blood pressure at 14 years of age in preterm children. Article. <i>Clin Sci (Lond).</i> 2000;98(2):137-142.                             | Wrong population (i.e., includes births occurring prior to the year 2000) |
| Doyle LW, Ford GW, Rickards AL, et al. Antenatal corticosteroids and outcome at 14 years of age in children with birth weight less than 1501 grams. <i>Pediatrics.</i> 2000;106(1):E2.                                | Wrong population (i.e., includes births occurring prior to the year 2000) |
| Karlsson R, Kallio J, Toppari J, Scheinin M, Kero P. Antenatal and early postnatal dexamethasone treatment decreases cortisol secretion in preterm infants. <i>Horm Res.</i> 2000;53(4):170-176.                      | Wrong population (i.e., includes births occurring prior to the year 2000) |
| Palta M, Sadeh-Badawi M, Evans M, Weinstein MR, McGuinness G, Newborn Lung P. Functional assessment of a multicenter very low-birth-weight cohort at age 5 years. <i>Arch Pediatr Adolesc Med.</i> 2000;154(1):23-30. | Wrong population (i.e., includes births occurring prior to the year 2000) |

**eAppendix 3.** Confounding Factors Addressed in a Systematic Review and Meta-analysis of Long-Term Outcomes Associated with Preterm Exposure to Antenatal Corticosteroids

**Maternal factors:**

| Author, Year                                                       | Family or maternal history of neurodevelopmental and psychological outcomes | Socioeconomic status                                     | Maternal substance use: drugs, alcohol, smoking | Chorioamnionitis | Environmental contaminant exposure | Other confounders                                                       |
|--------------------------------------------------------------------|-----------------------------------------------------------------------------|----------------------------------------------------------|-------------------------------------------------|------------------|------------------------------------|-------------------------------------------------------------------------|
| <b>A single course of ACS versus those unexposed</b>               |                                                                             |                                                          |                                                 |                  |                                    |                                                                         |
| <i>Children born preterm</i>                                       |                                                                             |                                                          |                                                 |                  |                                    |                                                                         |
| Agarwal, 2018 <sup>5</sup>                                         |                                                                             |                                                          |                                                 |                  |                                    |                                                                         |
| Kim, 2018 <sup>6</sup>                                             |                                                                             |                                                          |                                                 |                  |                                    |                                                                         |
| Lardon, 2017 <sup>9</sup>                                          |                                                                             |                                                          |                                                 |                  |                                    |                                                                         |
| Chawla, 2016 <sup>3</sup>                                          |                                                                             | <b>Adj:</b> health insurance status as surrogate for SES |                                                 |                  |                                    | <b>Adj:</b> participating center                                        |
| Tseng, 2016 <sup>10</sup>                                          |                                                                             |                                                          |                                                 |                  |                                    |                                                                         |
| Chawla, 2013 <sup>1</sup>                                          |                                                                             | <b>SU:</b> Medicaid insurance as surrogate for SES       |                                                 |                  |                                    |                                                                         |
| McElrath, 2009 <sup>8</sup>                                        |                                                                             |                                                          |                                                 |                  |                                    |                                                                         |
| Lee, 2008 <sup>4</sup>                                             |                                                                             | <b>Adj:</b> education                                    |                                                 |                  |                                    | <b>Adj:</b> mother living with the infant at corrected age 18-22 months |
| Laughon, 2009 <sup>7</sup>                                         |                                                                             |                                                          |                                                 |                  |                                    |                                                                         |
| <b>Unspecified number of courses of ACS versus those unexposed</b> |                                                                             |                                                          |                                                 |                  |                                    |                                                                         |
| <i>Children born preterm or at term</i>                            |                                                                             |                                                          |                                                 |                  |                                    |                                                                         |
| Lamminmaki 2021 <sup>11</sup>                                      |                                                                             |                                                          |                                                 |                  |                                    | <b>Adj:</b> age                                                         |



| Author, Year                  | Family or maternal history of neurodevelopmental and psychological outcomes | Socioeconomic status      | Maternal substance use: drugs, alcohol, smoking | Chorioamnionitis | Environmental contaminant exposure | Other confounders                                                                                                                 |
|-------------------------------|-----------------------------------------------------------------------------|---------------------------|-------------------------------------------------|------------------|------------------------------------|-----------------------------------------------------------------------------------------------------------------------------------|
| Raikonnen, 2020 <sup>12</sup> | <b>Adj:</b> lifetime maternal mental disorder diagnosis                     |                           | <b>Adj:</b> maternal smoking during pregnancy   |                  |                                    | <b>Adj:</b> age, parity, pre-pregnancy BMI, GDM, hypertension in pregnancy                                                        |
| Wolford, 2020 <sup>13</sup>   | <b>Adj</b>                                                                  | <b>SU, Adj:</b> education | <b>Adj</b>                                      |                  |                                    | <b>Adj:</b> age, parity, maternal early pregnancy BMI, hypertensive and diabetic disorders in pregnancy and pre-pregnancy, asthma |
| <i>Children born preterm</i>  |                                                                             |                           |                                                 |                  |                                    |                                                                                                                                   |
| Aviram, 2021 <sup>15</sup>    |                                                                             | <b>Adj:</b> income        |                                                 |                  |                                    | <b>Adj:</b> Maternal age, parity, chronic hypertension, pregestational diabetes, hypertensive complications, gestational diabetes |
| Hutcheon, 2020 <sup>17</sup>  |                                                                             |                           | <b>Adj:</b> maternal smoking during pregnancy   |                  |                                    | <b>Adj:</b> maternal age, parity, pre-pregnancy                                                                                   |

| Author, Year                 | Family or maternal history of neurodevelopmental and psychological outcomes | Socioeconomic status                                                       | Maternal substance use: drugs, alcohol, smoking | Chorioamnionitis                                   | Environmental contaminant exposure | Other confounders                                                                                                                           |
|------------------------------|-----------------------------------------------------------------------------|----------------------------------------------------------------------------|-------------------------------------------------|----------------------------------------------------|------------------------------------|---------------------------------------------------------------------------------------------------------------------------------------------|
|                              |                                                                             |                                                                            |                                                 |                                                    |                                    | BMI, hypertension in pregnancy, diabetes,                                                                                                   |
| Gentle, 2020 <sup>16</sup>   |                                                                             | <b>Adj:</b> health insurance status as surrogate for SES                   |                                                 |                                                    |                                    | <b>Adj:</b> maternal race, study centre                                                                                                     |
| Ushida, 2020 <sup>21</sup>   |                                                                             |                                                                            |                                                 | <b>Adj</b>                                         |                                    | <b>Adj:</b> age, parity, diabetes including gestational diabetes<br><b>E:</b> incomplete medical records including maternal characteristics |
| Li, 2019 <sup>24</sup>       |                                                                             |                                                                            |                                                 |                                                    |                                    |                                                                                                                                             |
| Basset, 2018 <sup>22</sup>   |                                                                             | <b>Adj:</b> SES, and “social security benefits for those with low incomes” |                                                 | <b>Adj</b>                                         |                                    | <b>Adj:</b> hypertensive disorders, pre-existing disease                                                                                    |
| Haslam, 2018 <sup>14</sup>   |                                                                             | <b>Adj:</b> employment                                                     | <b>Adj:</b> substance use                       |                                                    |                                    | <b>Adj:</b> ethnicity                                                                                                                       |
| Ishikawa, 2015 <sup>23</sup> |                                                                             |                                                                            |                                                 | <b>Adj:</b> histological chorioamnionitis ≥stage 2 |                                    | <b>Adj:</b> age, parity, pre-eclampsia                                                                                                      |
| Kallen, 2015 <sup>27</sup>   |                                                                             |                                                                            |                                                 |                                                    |                                    |                                                                                                                                             |

| Author, Year                            |                                        | Family or maternal history of neurodevelopmental and psychological outcomes | Socioeconomic status       | Maternal substance use: drugs, alcohol, smoking | Chorioamnionitis                                       | Environmental contaminant exposure | Other confounders                                                                                                        |
|-----------------------------------------|----------------------------------------|-----------------------------------------------------------------------------|----------------------------|-------------------------------------------------|--------------------------------------------------------|------------------------------------|--------------------------------------------------------------------------------------------------------------------------|
| Miyazaki, 2015 <sup>19</sup>            |                                        |                                                                             |                            |                                                 | S (those with and without histologic chorioamnionitis) |                                    | Adj: age, parity, diabetes, pre-eclampsia                                                                                |
| Sun, 2015 <sup>29</sup>                 |                                        |                                                                             |                            |                                                 |                                                        |                                    |                                                                                                                          |
| Ochiai, 2014 <sup>25</sup>              |                                        |                                                                             |                            |                                                 |                                                        |                                    |                                                                                                                          |
| Kiechl-Kohlendorfer, 2009 <sup>28</sup> |                                        |                                                                             |                            |                                                 |                                                        |                                    |                                                                                                                          |
| <i>Children born at term</i>            |                                        |                                                                             |                            |                                                 |                                                        |                                    |                                                                                                                          |
| Melamed, 2019 <sup>30</sup>             |                                        |                                                                             | Adj: Income                |                                                 |                                                        |                                    | Adj: Age, parity, chronic hypertension, pregestational and gestational diabetes, hypertensive complications of pregnancy |
| Total studies:                          | Single course of ACS v unexposed       | E: 0; Adj: 0<br>M: 0; S: 0                                                  | E: 0; Adj: 2<br>M: 0; S: 0 | E: 0; Adj: 0<br>M: 0; S: 0                      | E: 0; Adj: 0<br>M: 0; S: 0                             | E: 0; Adj: 0<br>M: 0; S: 0         |                                                                                                                          |
|                                         | Unspecified courses of ACS v unexposed | E: 0; Adj: 2<br>M: 0; S: 0                                                  | E: 0; Adj: 6<br>M: 0; S: 0 | E: 0; Adj: 4<br>M: 0; S: 0                      | E: 0; Adj: 3<br>M: 0; S: 1                             | E: 0; Adj: 0<br>M: 0; S: 0         |                                                                                                                          |

**Legend:**

A – adjusted, SU – similar in univariate analysis, E – excluded, S – stratified

**Fetal factors:**

| Author, year                                         | Postnatal steroid exposure | GA at birth                                               | IUGR | Multiple gestation | Chromosomal anomaly | Delivery difficulties/ mode of birth | Neonatal sepsis                              | Other fetal confounders                                                                                     |
|------------------------------------------------------|----------------------------|-----------------------------------------------------------|------|--------------------|---------------------|--------------------------------------|----------------------------------------------|-------------------------------------------------------------------------------------------------------------|
| <b>A single course of ACS versus those unexposed</b> |                            |                                                           |      |                    |                     |                                      |                                              |                                                                                                             |
| <i>Children born preterm</i>                         |                            |                                                           |      |                    |                     |                                      |                                              |                                                                                                             |
| Agarwal, 2018 <sup>5</sup>                           |                            |                                                           |      |                    |                     |                                      |                                              |                                                                                                             |
| Kim, 2018 <sup>6</sup>                               |                            | <b>S</b>                                                  |      |                    |                     |                                      |                                              |                                                                                                             |
| Lardon, 2017 <sup>9</sup>                            |                            | <b>E</b> (includes preterm infants)                       |      |                    | <b>E</b>            |                                      | <b>Adj</b>                                   | <b>Adj:</b> SGA, PDA                                                                                        |
| Chawla, 2016 <sup>3</sup>                            |                            | <b>E</b> (includes extremely preterm infants), <b>Adj</b> |      |                    |                     |                                      |                                              | <b>Adj:</b> infant sex, race/ ethnicity                                                                     |
| Tseng, 2016 <sup>10</sup>                            |                            | <b>E</b> (includes infants born <35 weeks, BW <1500g)     |      |                    |                     |                                      |                                              |                                                                                                             |
| Chawla, 2013 <sup>1</sup>                            |                            | <b>E:</b> includes extremely preterm infants only         |      |                    | <b>E</b>            |                                      |                                              | <b>E:</b> still births, congenital infection, neonates not resuscitated at birth due to extreme prematurity |
| McElrath, 2009 <sup>8</sup>                          |                            | <b>E</b> (includes infants born <28 weeks)                |      |                    |                     |                                      |                                              |                                                                                                             |
| Lee, 2008 <sup>4</sup>                               | <b>Adj</b>                 | <b>Adj</b>                                                |      | <b>Adj</b>         | <b>E</b>            | <b>Adj:</b> mode of delivery         | <b>Adj:</b> early onset or late onset sepsis | <b>Adj:</b> infant sex, SGA, severe IVH, PVL, treated PDA, chronic                                          |

| Author, year                                                       | Postnatal steroid exposure | GA at birth                                | IUGR | Multiple gestation | Chromosomal anomaly | Delivery difficulties/<br>mode of birth | Neonatal sepsis | Other fetal confounders                                                                                        |
|--------------------------------------------------------------------|----------------------------|--------------------------------------------|------|--------------------|---------------------|-----------------------------------------|-----------------|----------------------------------------------------------------------------------------------------------------|
|                                                                    |                            |                                            |      |                    |                     |                                         |                 | lung disease, race                                                                                             |
| Laughon, 2009 <sup>7</sup>                                         |                            | <b>E</b> (includes infants born <28 weeks) |      |                    |                     |                                         |                 |                                                                                                                |
| <b>Unspecified number of courses of ACS versus those unexposed</b> |                            |                                            |      |                    |                     |                                         |                 |                                                                                                                |
| <i>Children born preterm or at term</i>                            |                            |                                            |      |                    |                     |                                         |                 |                                                                                                                |
| Lamminmaki 2021 <sup>11</sup>                                      |                            | <b>M</b>                                   |      | <b>Adj</b>         |                     |                                         |                 | <b>Adj:</b> age, number of brothers, number of sisters, motor, or cognitive impairment                         |
| Raikonnen, 2020 <sup>12</sup>                                      |                            | <b>Adj</b>                                 |      | <b>E</b>           |                     | <b>Adj:</b> mode of delivery            |                 | <b>Adj:</b> infant sex, admission to NICU, weight, low 5-min Apgar (maximum at 1 and 5 min)                    |
| Wolford, 2020 <sup>13</sup>                                        |                            | <b>Adj</b>                                 |      | <b>E</b>           |                     | <b>Adj</b>                              |                 | <b>Adj:</b> infant sex, birth year, birth weight standardized by sex and GA according to Finnish growth charts |
| <i>Children born preterm</i>                                       |                            |                                            |      |                    |                     |                                         |                 |                                                                                                                |
| Aviram, 2021 <sup>15</sup>                                         |                            | <b>Adj, E</b> (excludes                    |      | <b>E</b>           | <b>E</b>            | <b>Adj:</b> mode of delivery            |                 | <b>Adj:</b> resuscitation                                                                                      |

| Author, year                 | Postnatal steroid exposure | GA at birth                                               | IUGR       | Multiple gestation | Chromosomal anomaly                             | Delivery difficulties/ mode of birth | Neonatal sepsis | Other fetal confounders                                                                                                                       |
|------------------------------|----------------------------|-----------------------------------------------------------|------------|--------------------|-------------------------------------------------|--------------------------------------|-----------------|-----------------------------------------------------------------------------------------------------------------------------------------------|
|                              |                            | infants born <34 weeks)                                   |            |                    |                                                 |                                      |                 | at birth, Infant sex, 5 min Apgar, birth weight <10th percentile, NICU admission<br><b>E:</b> deliveries complicated by intrapartum asphyxia, |
| Hutcheon, 2020 <sup>17</sup> |                            | <b>Adj</b>                                                |            |                    |                                                 | <b>Adj:</b> mode of delivery         |                 | <b>Adj:</b> infant sex, birthweight, 5 min Apgar                                                                                              |
| Gentle, 2020 <sup>16</sup>   |                            | <b>S, Adj</b>                                             |            | <b>SU</b>          | <b>E</b>                                        |                                      |                 | <b>Adj:</b> infant sex, SGA, follow-up window                                                                                                 |
| Ushida, 2020 <sup>21</sup>   |                            | <b>E</b> (excludes infants born <24 weeks),<br><b>Adj</b> |            | <b>E</b>           | <b>E</b>                                        | <b>Adj</b>                           |                 | <b>Adj:</b> out-of-hospital birth, non-reassuring fetal status, SGA, infant sex                                                               |
| Li, 2019 <sup>24</sup>       |                            | <b>E</b> (includes extremely preterm infants)             |            |                    |                                                 |                                      |                 |                                                                                                                                               |
| Basset, 2018 <sup>22</sup>   |                            | <b>Adj</b>                                                | <b>Adj</b> | <b>Adj</b>         | <b>E:</b> genetic abnormalities / malformations |                                      |                 | <b>Adj:</b> ZS of birth weight and head                                                                                                       |

| Author, year                 | Postnatal steroid exposure | GA at birth                                            | IUGR | Multiple gestation | Chromosomal anomaly                                           | Delivery difficulties/ mode of birth | Neonatal sepsis               | Other fetal confounders                                                |
|------------------------------|----------------------------|--------------------------------------------------------|------|--------------------|---------------------------------------------------------------|--------------------------------------|-------------------------------|------------------------------------------------------------------------|
|                              |                            |                                                        |      |                    |                                                               |                                      |                               | circumference, sex<br><b>S, Adj:</b> head circumference at birth       |
| Haslam, 2018 <sup>14</sup>   |                            | <b>E</b> (includes preterm infants), <b>Adj</b>        |      |                    | <b>E</b>                                                      |                                      | <b>Adj:</b> late onset sepsis | <b>Adj:</b> male sex, SNAP-II score >20, BPD, brain injury             |
| Ishikawa, 2015 <sup>23</sup> |                            | <b>E</b> (includes preterm infants), <b>Adj</b>        |      | <b>E</b>           | <b>E:</b> major congenital malformation                       | <b>Adj:</b> mode of delivery         |                               | <b>Adj:</b> infant sex, non-reassuring fetal status, birth weight      |
| Kallen, 2015 <sup>27</sup>   |                            | <b>E</b> (includes infants born <27 weeks), <b>Adj</b> |      |                    |                                                               |                                      |                               |                                                                        |
| Miyazaki, 2015 <sup>19</sup> |                            | <b>E</b> (includes preterm infants), <b>Adj</b>        |      | <b>E</b>           | <b>E</b>                                                      | <b>Adj:</b> mode of delivery         |                               | <b>Adj:</b> infant sex, non-reassuring fetal status, birth weight, SGA |
| Sun, 2015 <sup>29</sup>      |                            | <b>E</b> (includes infants <32 weeks)                  |      |                    | <b>E:</b> genetic or metabolic diseases, congenital anomalies |                                      |                               | <b>E:</b> pneumothorax                                                 |
| Ochiai, 2014 <sup>25</sup>   |                            | <b>E</b> (includes infants born 22-24 weeks)           |      |                    | <b>E</b> (none of the infants had congenital anomalies)       |                                      |                               |                                                                        |

| Author, year                             | Postnatal steroid exposure                    | GA at birth                                                                           | IUGR                                                             | Multiple gestation                                             | Chromosomal anomaly                                            | Delivery difficulties/ mode of birth                            | Neonatal sepsis                                                | Other fetal confounders                                                                                                                                               |
|------------------------------------------|-----------------------------------------------|---------------------------------------------------------------------------------------|------------------------------------------------------------------|----------------------------------------------------------------|----------------------------------------------------------------|-----------------------------------------------------------------|----------------------------------------------------------------|-----------------------------------------------------------------------------------------------------------------------------------------------------------------------|
| Kiechl-Kohlen-dorfer, 2009 <sup>28</sup> |                                               | <b>E</b> (includes infants born 23-32 weeks),<br><b>S</b> : <30 weeks GA, 30-32 weeks |                                                                  |                                                                |                                                                |                                                                 |                                                                |                                                                                                                                                                       |
| <i>Children born at term</i>             |                                               |                                                                                       |                                                                  |                                                                |                                                                |                                                                 |                                                                |                                                                                                                                                                       |
| Melamed, 2019 <sup>30</sup>              |                                               | <b>Adj</b>                                                                            |                                                                  | <b>E</b>                                                       | <b>E</b> : genetic or major structural abnormalities           | <b>Adj</b> : mode of delivery, induction of labor               |                                                                | <b>Adj</b> : infant sex, birth weight <10 <sup>th</sup> percentile, NICU admission, fetal acidemia (intrapartum asphyxia), need for delivery room CPR, 5 min Apgar <7 |
| <b>Total studies:</b>                    | <b>Single course of ACS v unexposed</b>       | <b>E</b> : 0<br><b>Adj</b> : 1<br><b>M</b> : 0<br><b>S</b> : 0                        | <b>E</b> : 6<br><b>Adj</b> : 2<br><b>M</b> : 0<br><b>S</b> : 1   | <b>E</b> : 0<br><b>Adj</b> : 0<br><b>M</b> : 0<br><b>S</b> : 0 | <b>E</b> : 0<br><b>Adj</b> : 1<br><b>M</b> : 0<br><b>S</b> : 0 | <b>E</b> : 3<br><b>Adj</b> : 0<br><b>M</b> : 0<br><b>S</b> : 0  | <b>E</b> : 0<br><b>Adj</b> : 1<br><b>M</b> : 0<br><b>S</b> : 0 | <b>E</b> : 0<br><b>Adj</b> : 2<br><b>M</b> : 0<br><b>S</b> : 0                                                                                                        |
|                                          | <b>Unspecified courses of ACS v unexposed</b> | <b>E</b> : 0<br><b>Adj</b> : 0<br><b>M</b> : 0<br><b>S</b> : 0                        | <b>E</b> : 10<br><b>Adj</b> : 12<br><b>M</b> : 1<br><b>S</b> : 2 | <b>E</b> : 0<br><b>Adj</b> : 1<br><b>M</b> : 0<br><b>S</b> : 0 | <b>E</b> : 7<br><b>Adj</b> : 2<br><b>M</b> : 0<br><b>S</b> : 0 | <b>E</b> : 10<br><b>Adj</b> : 0<br><b>M</b> : 0<br><b>S</b> : 0 | <b>E</b> : 0<br><b>Adj</b> : 8<br><b>M</b> : 0<br><b>S</b> : 0 | <b>E</b> : 0<br><b>Adj</b> : 1<br><b>M</b> : 0<br><b>S</b> : 0                                                                                                        |

**Legend:**

A – adjusted, E – excluded, S – stratified, SU – similar in univariate analysis, M – matched, GA – gestational age, NICU – neonatal intensive care unit, IVH – intraventricular hemorrhage, SGA – small for gestational age, BW – birth weight, PVL – periventricular leukomalacia, BPD – bronchopulmonary dysplasia, PDA – patent ductus arteriosus, **bolded confounders** – prespecified important confounders



**Uteroplacental factors:**

| Author, year                                                       | Placental abruption | Other uteroplacental factors |
|--------------------------------------------------------------------|---------------------|------------------------------|
| <b>A single course of ACS versus those unexposed</b>               |                     |                              |
| <i>Children born preterm</i>                                       |                     |                              |
| Agarwal, 2018 <sup>5</sup>                                         |                     |                              |
| Kim, 2018 <sup>6</sup>                                             |                     |                              |
| Lardon, 2017 <sup>9</sup>                                          |                     |                              |
| Chawla, 2016 <sup>3</sup>                                          |                     |                              |
| Tseng, 2016 <sup>10</sup>                                          |                     |                              |
| Chawla, 2013 <sup>1</sup>                                          |                     |                              |
| McElrath, 2009 <sup>8</sup>                                        |                     |                              |
| Lee, 2008 <sup>4</sup>                                             |                     |                              |
| Laughon, 2009 <sup>7</sup>                                         |                     |                              |
| <b>Unspecified number of courses of ACS versus those unexposed</b> |                     |                              |
| <i>Children born preterm or at term</i>                            |                     |                              |
| Lamminmaki 2021 <sup>11</sup>                                      |                     |                              |
| Raikonnen, 2020 <sup>12</sup>                                      |                     | <b>Adj:</b> PPROM            |
| Wolford, 2020 <sup>13</sup>                                        |                     | <b>Adj:</b> PROM             |
| <i>Children born preterm</i>                                       |                     |                              |
| Aviram, 2021 <sup>15</sup>                                         |                     | <b>Adj:</b> PPROM            |
| Hutcheon, 2020 <sup>17</sup>                                       |                     |                              |
| Gentle, 2020 <sup>16</sup>                                         |                     |                              |
| Ushida, 2020 <sup>21</sup>                                         |                     | <b>Adj:</b> PROM             |
| Li, 2019 <sup>24</sup>                                             |                     |                              |
| Basset, 2018 <sup>22</sup>                                         | <b>Adj</b>          | <b>Adj:</b> PROM             |
| Haslam, 2018 <sup>14</sup>                                         |                     |                              |
| Ishikawa, 2015 <sup>23</sup>                                       |                     | <b>Adj:</b> PROM             |
| Kallen, 2015 <sup>27</sup>                                         |                     |                              |
| Miyazaki, 2015 <sup>19</sup>                                       |                     | <b>Adj:</b> PROM             |
| Sun, 2015 <sup>29</sup>                                            |                     |                              |
| Ochiai, 2014 <sup>25</sup>                                         |                     |                              |
| Kiechl-Kohlendorfer, 2009 <sup>28</sup>                            |                     |                              |

| Author, year                 |                                               | Placental abruption             | Other uteroplacental factors |
|------------------------------|-----------------------------------------------|---------------------------------|------------------------------|
| <i>Children born at term</i> |                                               |                                 |                              |
| Melamed, 2019 <sup>30</sup>  |                                               |                                 | <b>Adj:</b> PPROM            |
| <b>Total studies:</b>        | <b>Single course of ACS v unexposed</b>       | <b>E: 0; Adj: 0; M: 0; S: 0</b> |                              |
|                              | <b>Unspecified courses of ACS v unexposed</b> | <b>E: 0; Adj: 1; M: 0; S: 0</b> |                              |

**Legend:** A – adjusted, E – excluded, PPROM – preterm premature rupture of membranes, PROM – premature rupture of membrane

## eReferences

1. Chawla S, Bapat R, Pappas A, Bara R, Zidan M, Natarajan G. Neurodevelopmental outcome of extremely premature infants exposed to incomplete, no or complete antenatal steroids. *J Matern Fetal Neonatal Med*. 2013;26(15):1542-1547.
2. Gover A, Brummelte S, Synnes AR, et al. Single course of antenatal steroids did not alter cortisol in preterm infants up to 18 months. *Acta Paediatr*. 2012;101(6):604-608.
3. Chawla S, Natarajan G, Shankaran S, et al. Association of neurodevelopmental outcomes and neonatal morbidities of extremely premature infants with differential exposure to antenatal steroids. *JAMA Pediatr*. 2016;170(12):1164-1172.
4. Lee BH, Stoll BJ, McDonald SA, Higgins RD. Neurodevelopmental outcomes of extremely low birth weight infants exposed prenatally to dexamethasone versus betamethasone. *Pediatrics*. 2008;121(2):289-296.
5. Agarwal PK, Shi L, Rajadurai VS, et al. Factors affecting neurodevelopmental outcome at 2 years in very preterm infants below 1250 grams: A prospective study. *J Perinatol*. 2018;38(8):1093-1100.
6. Kim S-M, Sung J-H, Kuk J-Y, et al. Short-and long-term neonatal outcomes according to differential exposure to antenatal corticosteroid therapy in preterm births prior to 24 weeks of gestation. *PLoS One*. 2018;13(6):e0198471.
7. Laughon M, O'Shea MT, Allred EN, et al. Chronic lung disease and developmental delay at 2 years of age in children born before 28 weeks' gestation. *Pediatrics*. 2009;124(2):637-648.
8. McElrath TF, Allred EN, Boggess KA, et al. Maternal antenatal complications and the risk of neonatal cerebral white matter damage and later cerebral palsy in children born at an extremely low gestational age. *Am J Epidemiol*. 2009;170(7):819-828.
9. Lardón M, Uberos J, Narbona E. Does corticosteroid treatment during the pre and postnatal periods affect the neurodevelopmental outcome of premature newborns? *Biomedica*. 2017;37:104-111.
10. Tseng W-N, Chen C-C, Yu H-R, Huang L-T, Kuo H-C. Antenatal dexamethasone exposure in preterm infants is associated with allergic diseases and the mental development index in children. *Int J Environ Res Public Health*. 2016;13(12):1206.
11. Lamminmäki A, Kuiri-Hänninen T, Sankilampi U. Sex-typical behavior in children born preterm at very low birth weight. *Pediatr Res*. 2021;89(7):1765-1770.
12. Räikkönen K, Gissler M, Kajantie E. Associations between maternal antenatal corticosteroid treatment and mental and behavioral disorders in children. *JAMA*. 2020;323(19):1924-1933.
13. Wolford E, Lahti-Pulkkinen M, Girchenko P, et al. Associations of antenatal glucocorticoid exposure with mental health in children. *Psychol Med*. 2020;50(2):247-257.
14. Haslam MD, Lisonkova S, Creighton D, et al. Severe neurodevelopmental impairment in neonates born preterm: impact of varying definitions in a Canadian cohort. *J Pediatr*. 2018;197:75-81. e4.

15. Aviram A, Murphy K, McDonald S, et al. Antenatal corticosteroids and neurodevelopmental outcomes in late preterm births. *Arch Dis Child Fetal Neonatal Ed.* 2021;(0):F1-F6.
16. Gentle SJ, Carlo WA, Tan S, et al. Association of antenatal corticosteroids and magnesium sulfate therapy with neurodevelopmental outcome in extremely preterm children. *Obstet Gynecol.* 2020;135(6):1377-1386.
17. Hutcheon JA, Harper S, Liauw J, Skoll MA, Srouf M, Strumpf EC. Antenatal corticosteroid administration and early school age child development: A regression discontinuity study in British Columbia, Canada. *PLoS Med.* 2020;17(12):e1003435.
18. Bulbul L, Elitok GK, Ayyıldız E, et al. Neuromotor Development Evaluation of Preterm Babies Less than 34 Weeks of Gestation with Bayley III at 18-24 Months. *Biomed Res Int.* 2020;2020
19. Miyazaki K, Furuhashi M, Ishikawa K, et al. Long-term outcomes of antenatal corticosteroids treatment in very preterm infants after chorioamnionitis. *Arch Gynecol Obstet.* 2015;292(6):1239-1246.
20. Ushida T, Kotani T, Sadachi R, et al. Antenatal corticosteroids and outcomes in preterm twins. *Obstet Gynecol.* 2020;135(6):1387-1397.
21. Ushida T, Kotani T, Hayakawa M, et al. Antenatal corticosteroids and preterm offspring outcomes in hypertensive disorders of pregnancy: A Japanese cohort study. *Sci Rep.* 2020;10(1):1-10.
22. Basset H, Nusinovici S, Huetz N, et al. Efficacy of antenatal corticosteroid treatment on neurodevelopmental outcome according to head circumference at birth. *Neonatology.* 2018;113(1):55-62.
23. Ishikawa H, Miyazaki K, Ikeda T, et al. The effects of antenatal corticosteroids on short-and long-term outcomes in small-for-gestational-age infants. *Int J Med Sci.* 2015;12(4):295.
24. Li Y, Meng D-h, Wei Q-f, et al. Neurodevelopmental outcomes of extremely preterm infants in southern China: A multicenter study. *Early Hum Dev.* 2019;133:5-10.
25. Ochiai M, Kinjo T, Takahata Y, et al. Survival and neurodevelopmental outcome of preterm infants born at 22-24 weeks of gestational age. *Neonatology.* 2014;105(2):79-84.
26. Young JM, Morgan BR, Powell TL, et al. Associations of perinatal clinical and magnetic resonance imaging measures with developmental outcomes in children born very preterm. *J Pediatr.* 2016;170:90-96.
27. Källén K, Serenius F, Westgren M, Maršál K, Group E. Impact of obstetric factors on outcome of extremely preterm births in Sweden: prospective population-based observational study (EXPRESS). *Acta Obstet Gynecol Scand.* 2015;94(11):1203-1214.
28. Kiechl-Kohlendorfer U, Ralser E, Peglow UP, Reiter G, Trawöger R. Adverse neurodevelopmental outcome in preterm infants: risk factor profiles for different gestational ages. *Acta Paediatr.* 2009;98(5):792-796.
29. Sun H, Zhou Y, Xiong H, et al. Prognosis of very preterm infants with severe respiratory distress syndrome receiving mechanical ventilation. *Lung.* 2015;193(2):249-254.

30. Melamed N, Asztalos E, Murphy K, et al. Neurodevelopmental disorders among term infants exposed to antenatal corticosteroids during pregnancy: a population-based study. *BMJ Open*. 2019;9(9):e031197.
